# Supplementary material for: A study of long-range transported smoke aerosols in the Upper Troposphere/Lower Stratosphere
Source: Copernicus journal article supplement (doi:10.5194/acp-2018-655), 2018-07-09
Supplement: Supplementary file 1 [file acp-2018-655-supplement.zip]

TotCO\_A

11 August

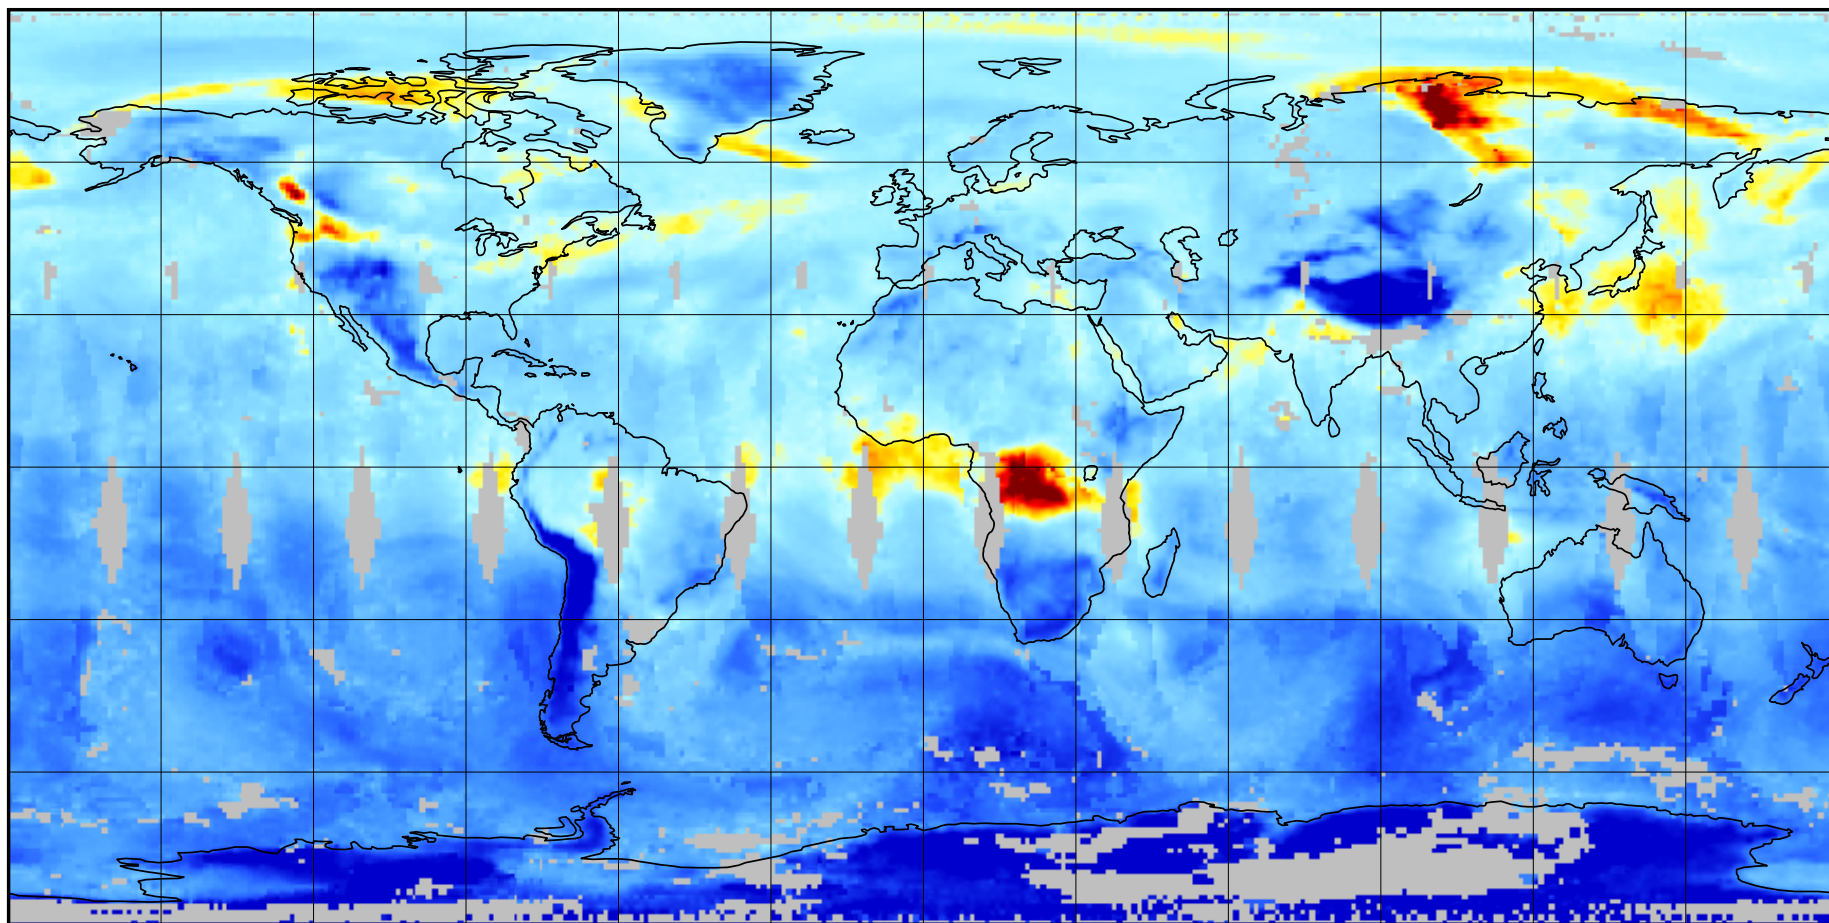

Total column CO (molecules/cm<sup>2</sup>)

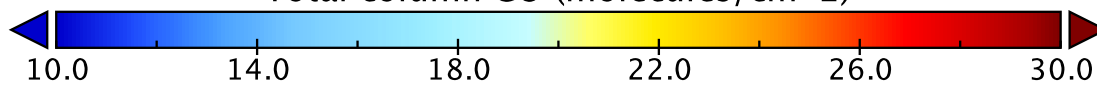

Data Min = 6.6, Max = 41.4, Mean = 15.4

TotCO\_A

12 August

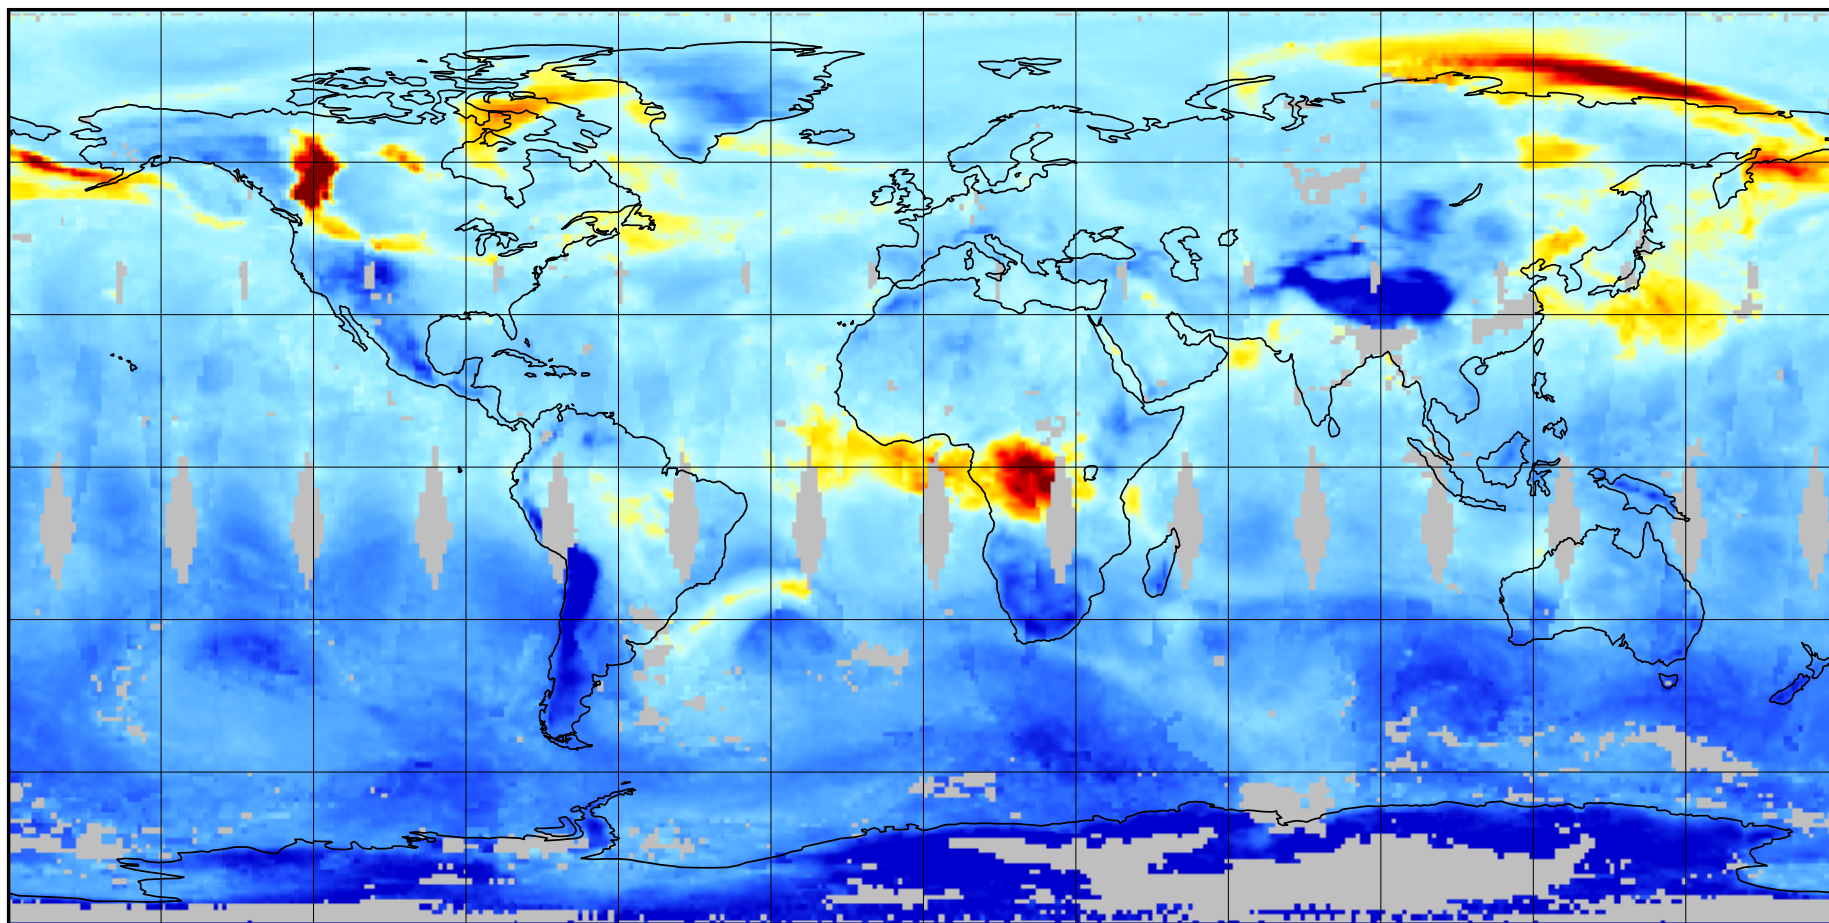

Total Column CO (molecules/cm<sup>2</sup>)

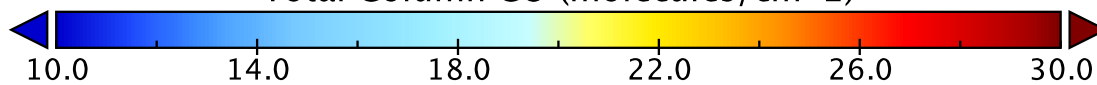

Data Min = 6.6, Max = 46.6, Mean = 15.6

TotCO\_A

13 August

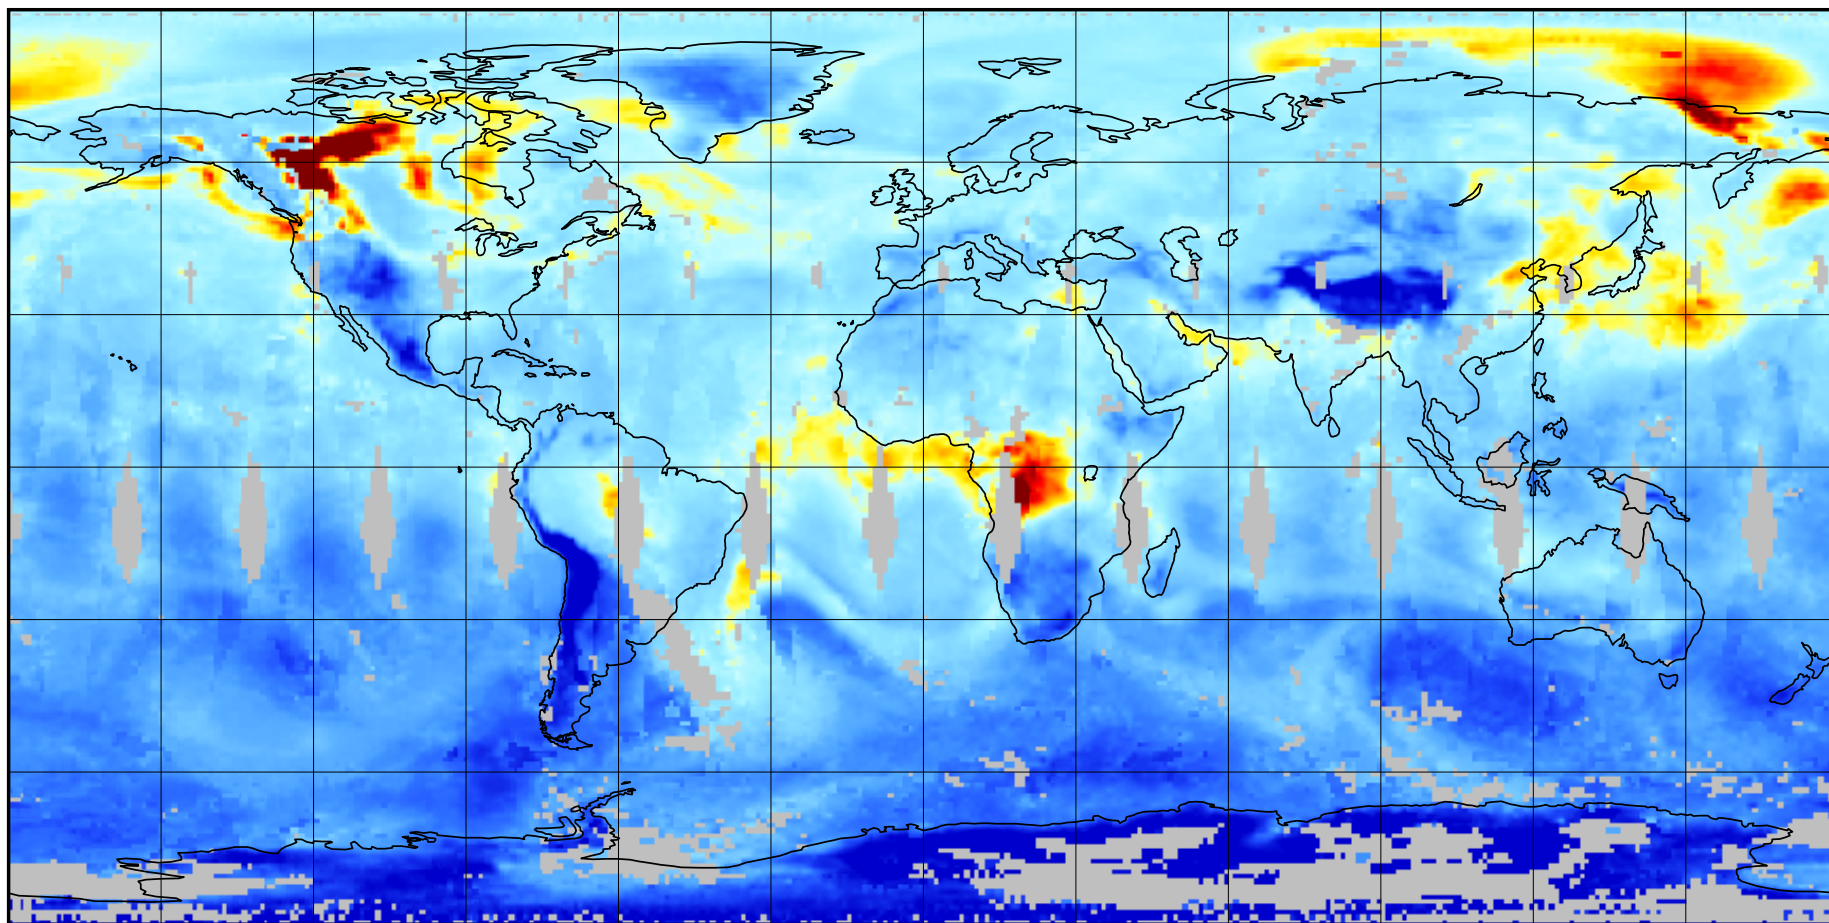

Total Column CO (molecules/cm<sup>2</sup>)



Data Min = 6.7, Max = 65.7, Mean = 15.7



TotCO\_A

14 August

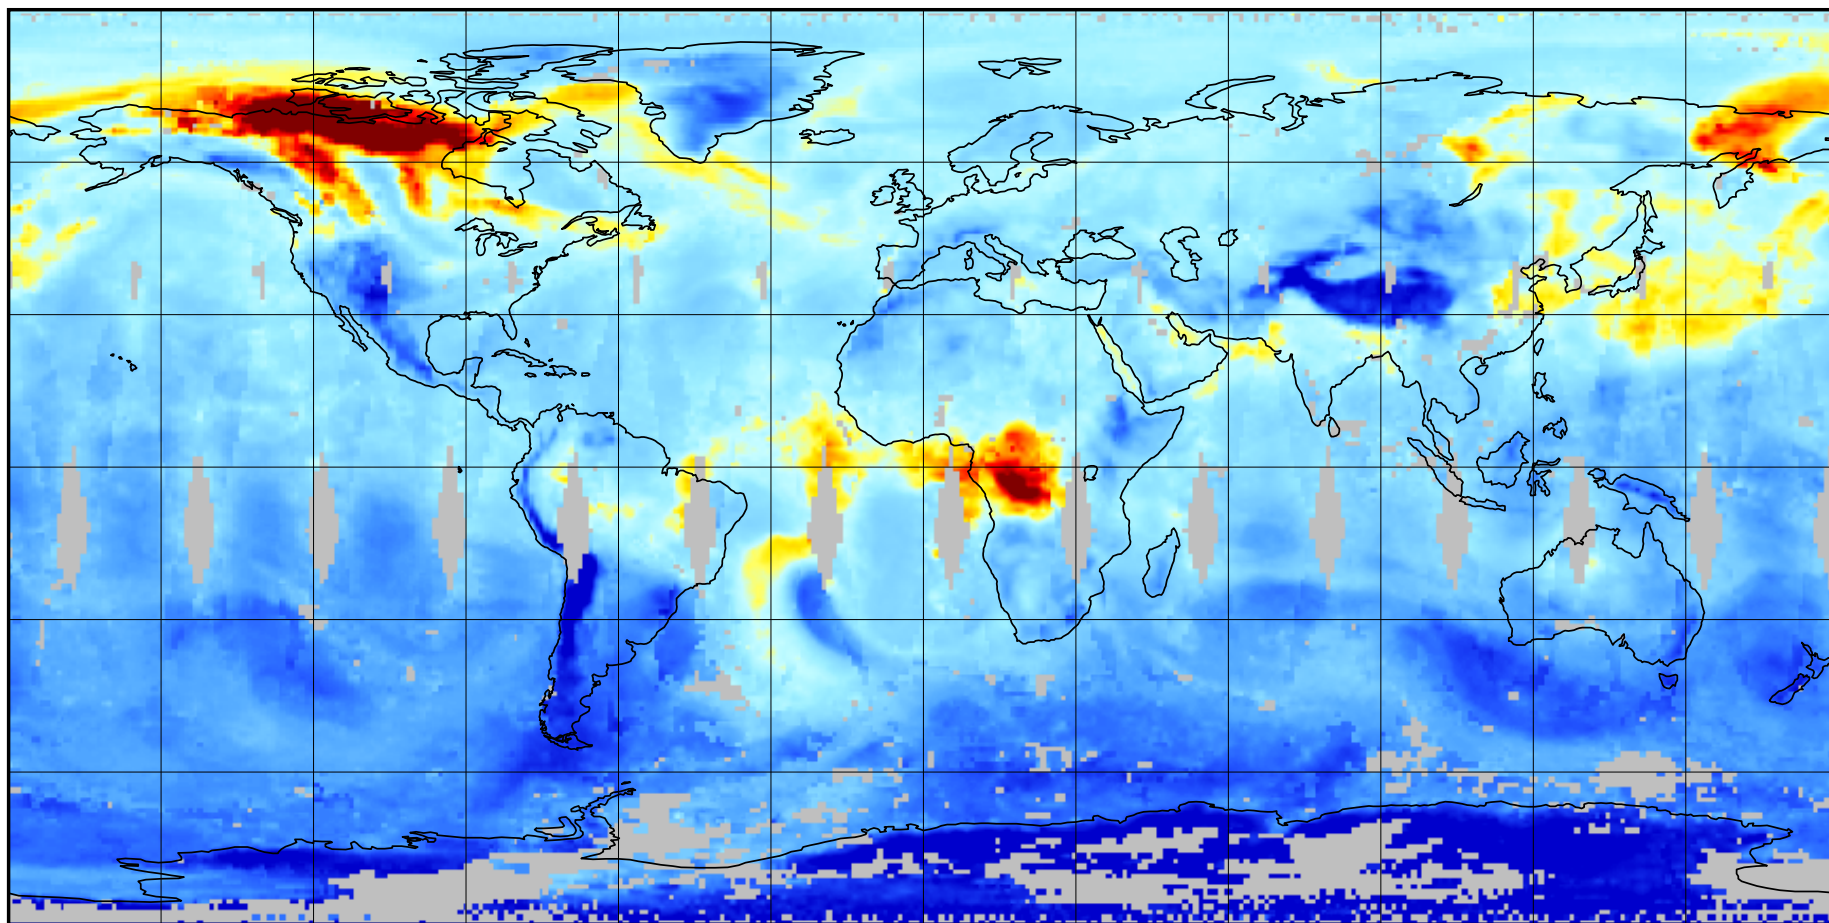

Total Column CO (molecules/cm<sup>2</sup>)



Data Min = 6.9, Max = 53.8, Mean = 15.8

TotCO\_A

15 August

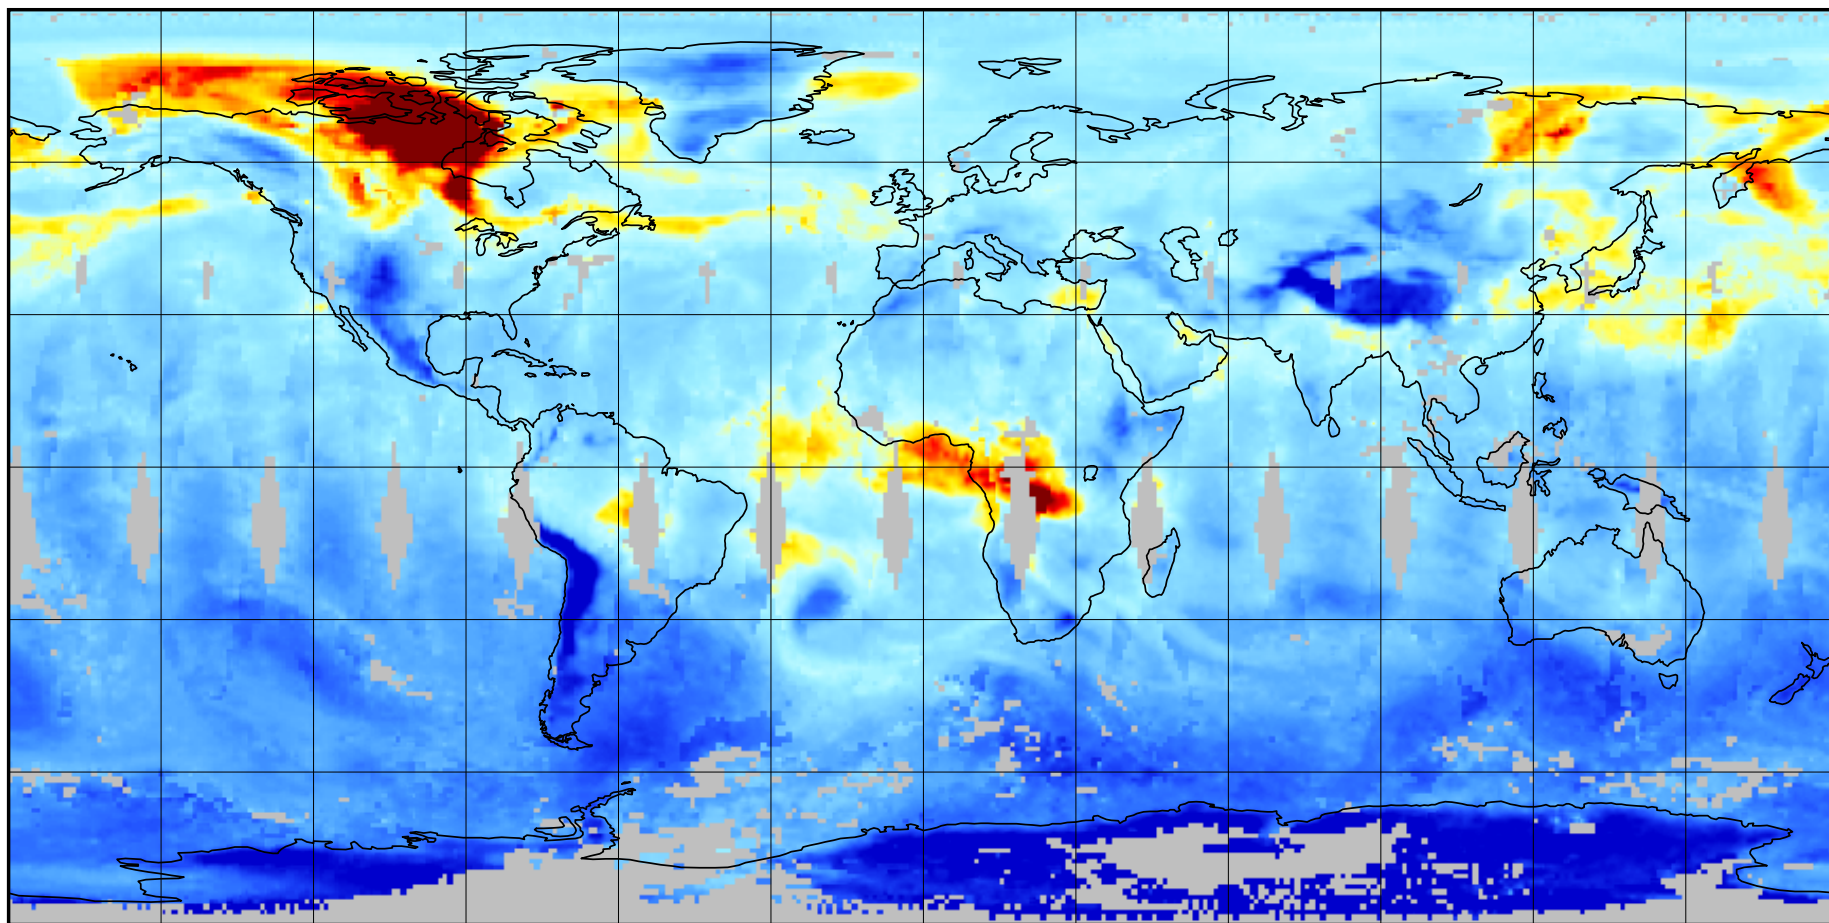

Total Column CO (molecules/cm<sup>2</sup>)

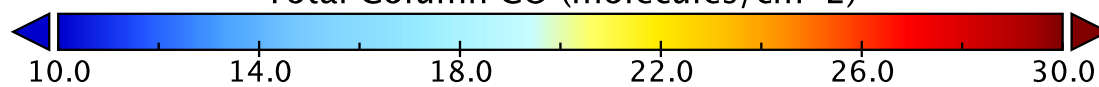

Data Min = 6.8, Max = 78.1, Mean = 15.8

TotCO\_A

16 August

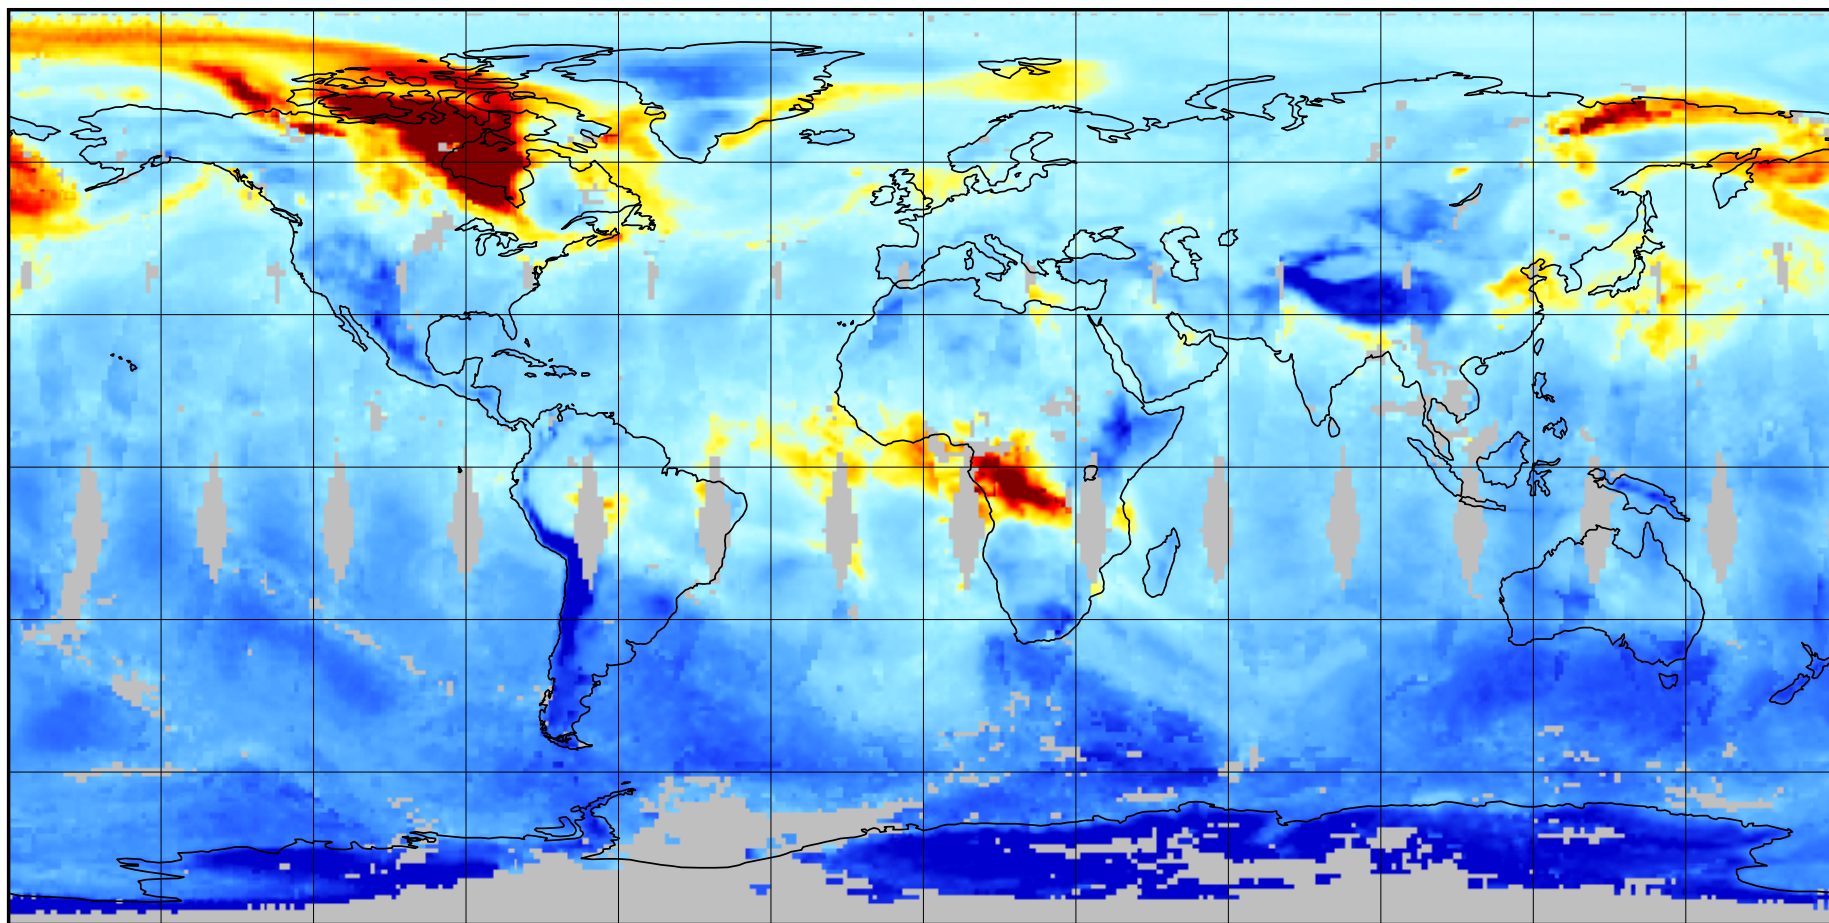

Total column CO (molecules/cm<sup>2</sup>)



Data Min = 6.1, Max = 74.4, Mean = 15.9



TotCO\_A

17 August

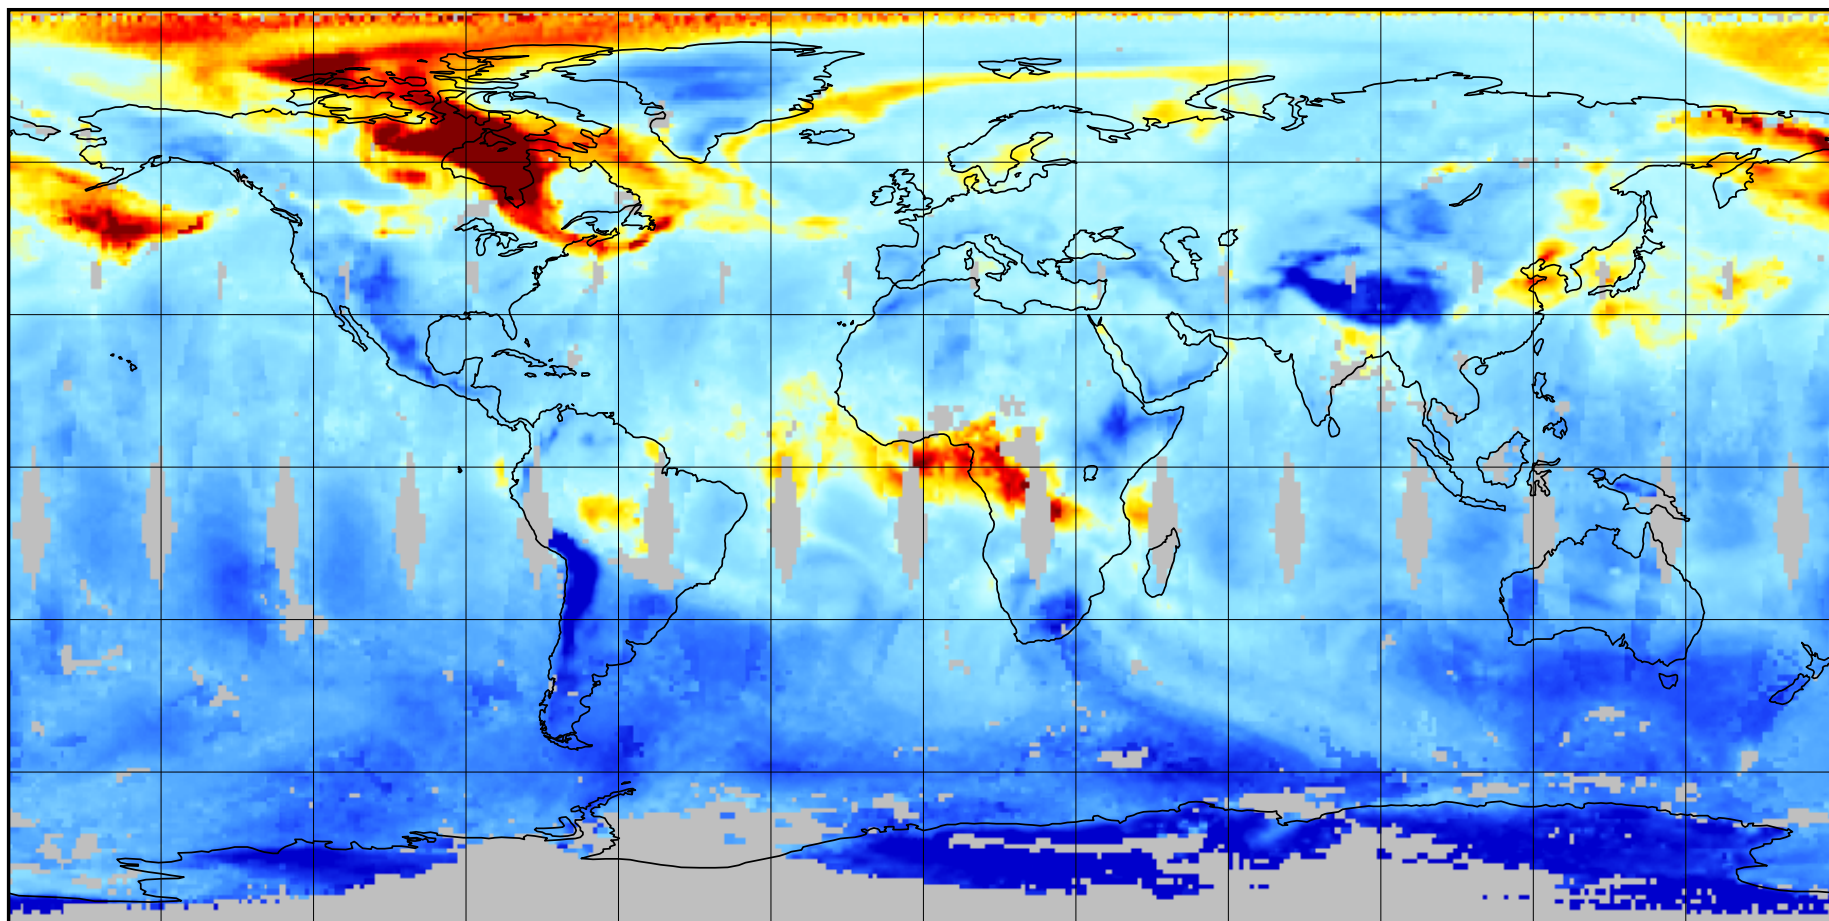

Total column CO (molecules/cm<sup>2</sup>)

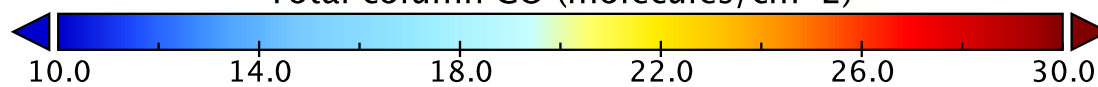

Data Min = 6.9, Max = 56.2, Mean = 15.9

TotCO\_A

18 August

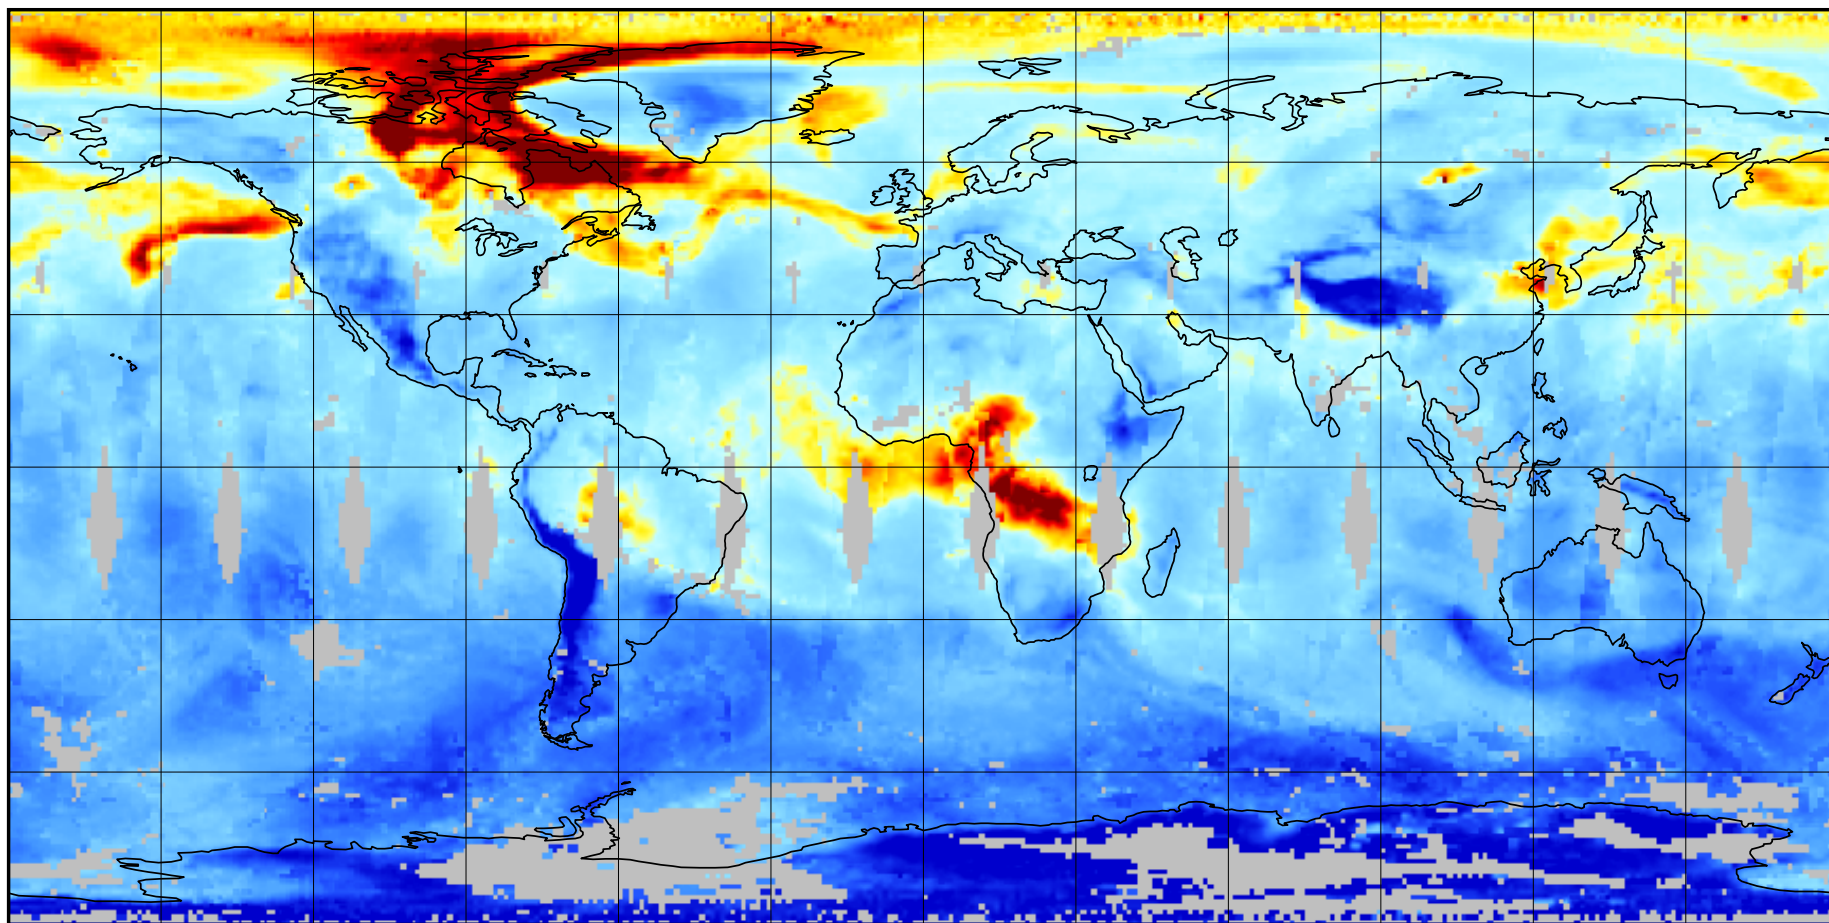

Total column CO (molecules/cm<sup>2</sup>)

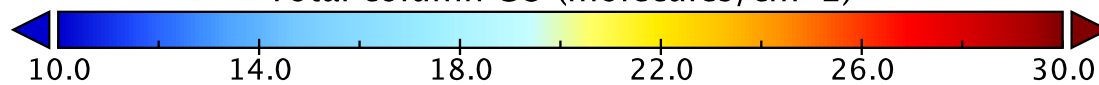

Data Min = 6.2, Max = 57.3, Mean = 16.0



TotCO\_A

19 August

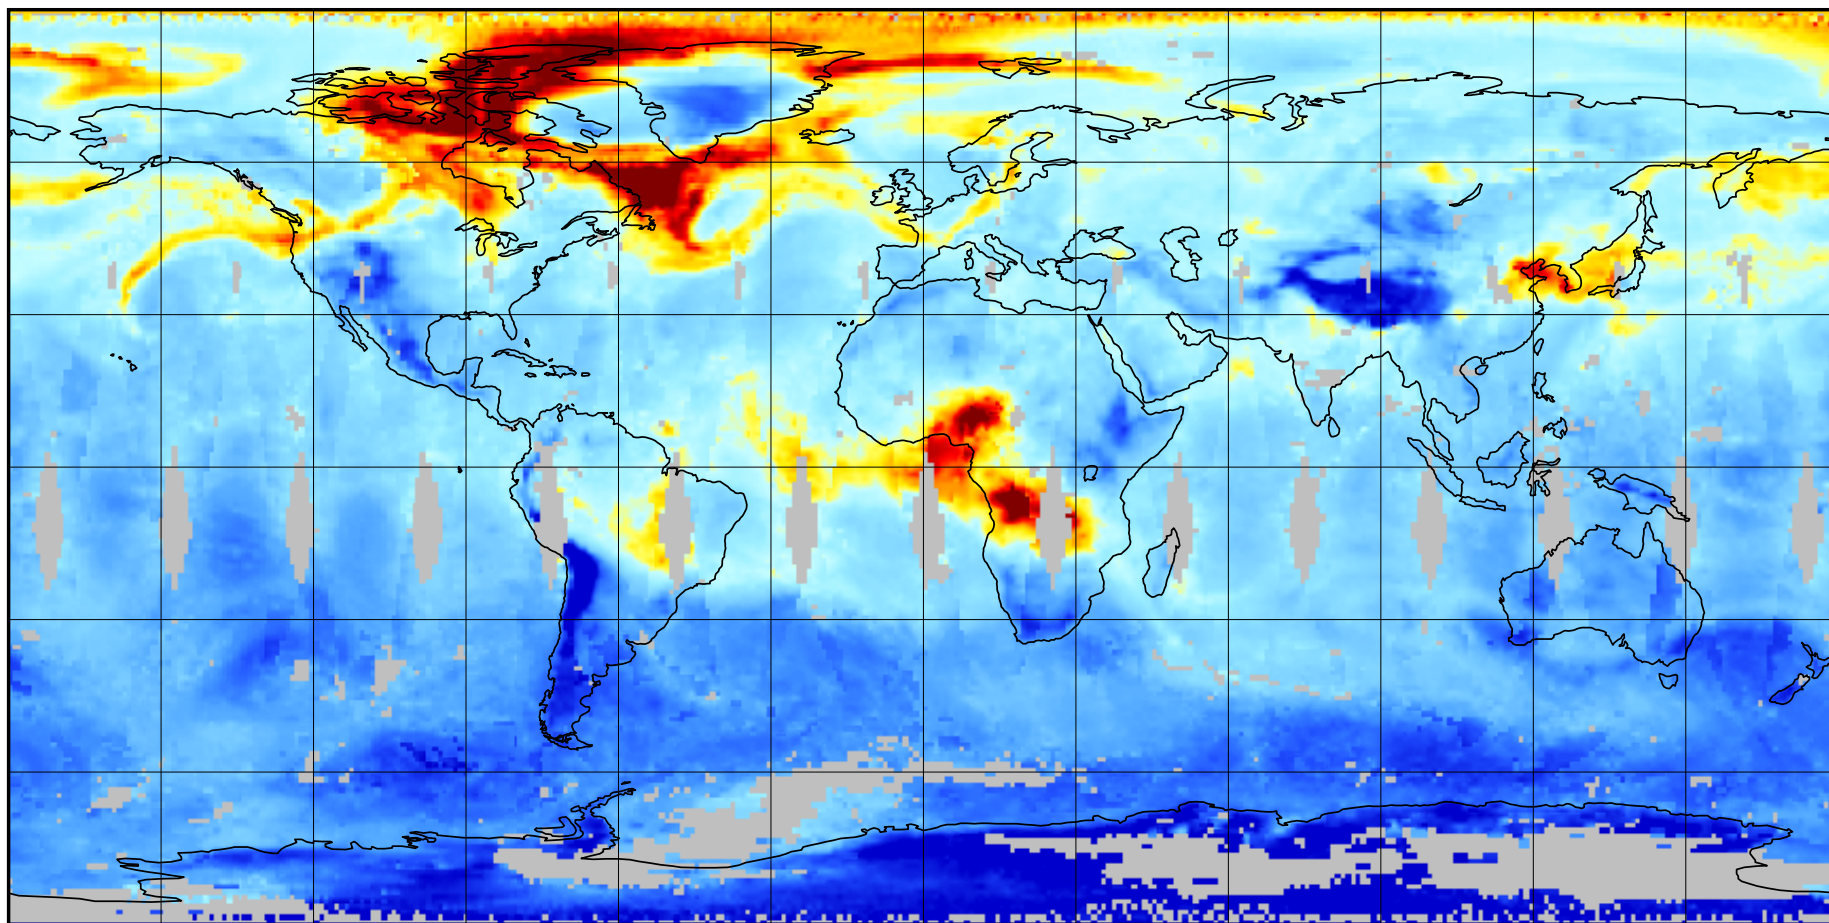

Total column CO (molecules/cm<sup>2</sup>)

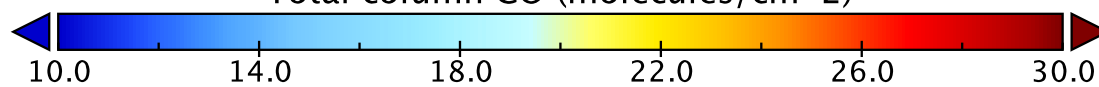

Data Min = 6.8, Max = 40.4, Mean = 16.0

TotCO\_A

20 August

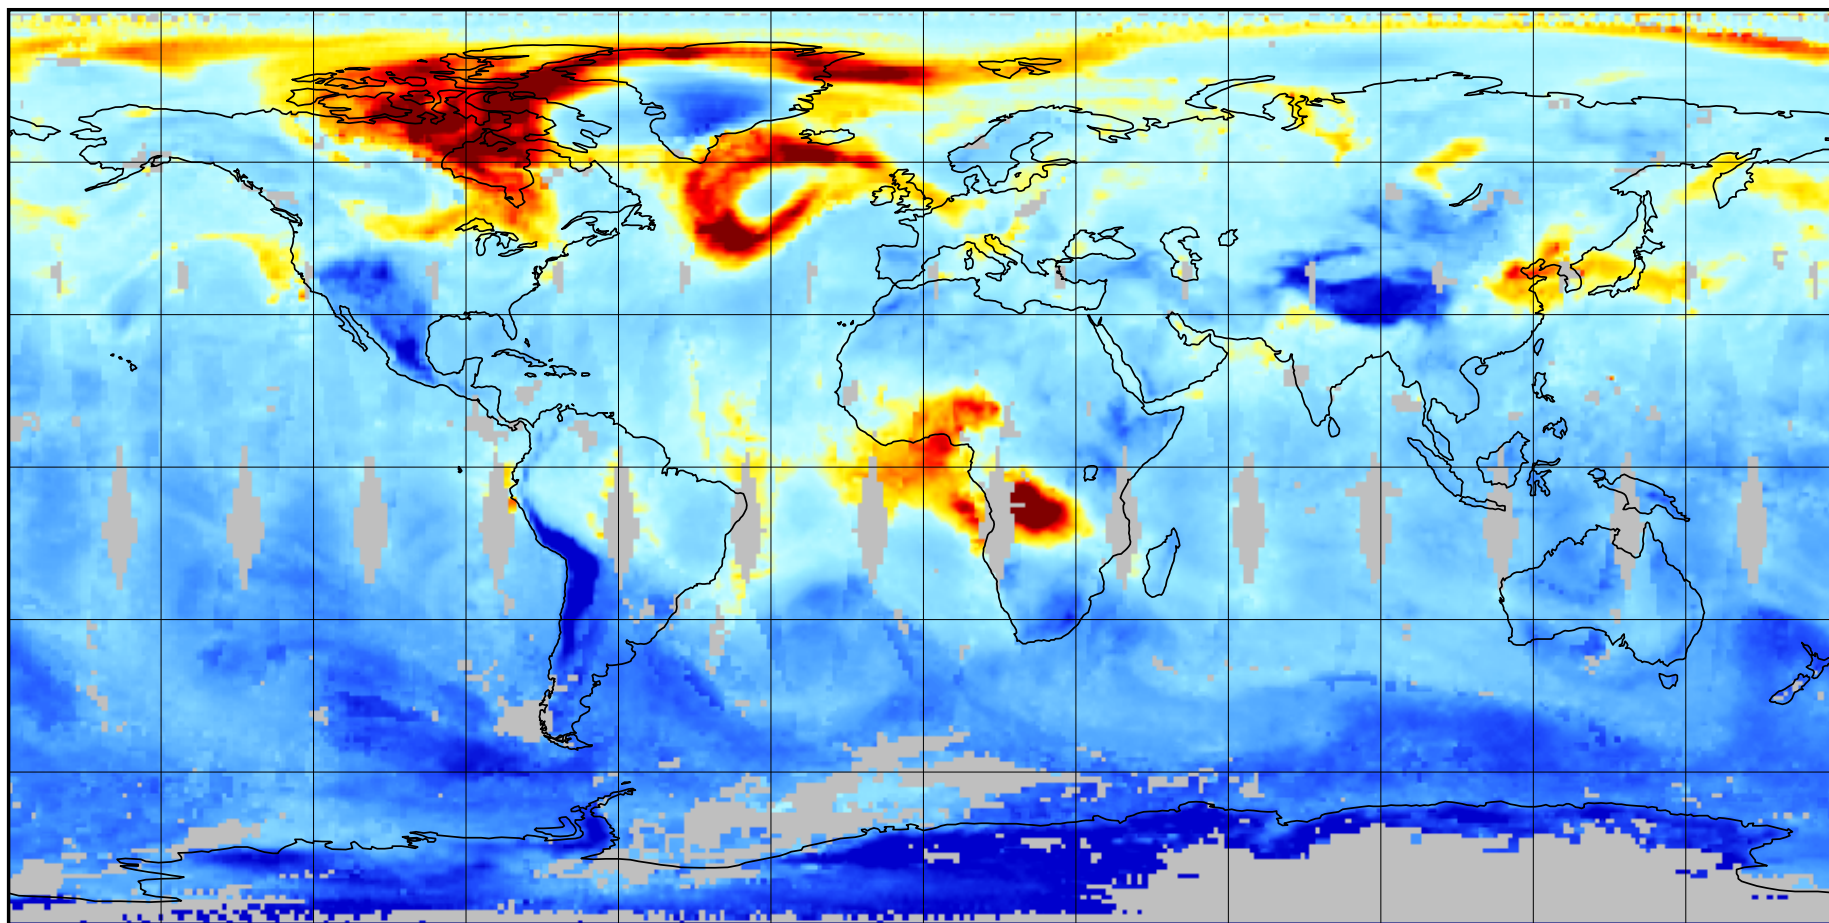

Total column CO (molecules/cm<sup>2</sup>)

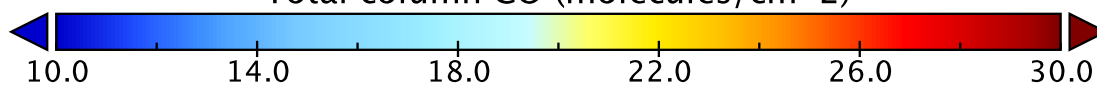

Data Min = 7.0, Max = 54.4, Mean = 16.1

TotCO\_A

21 August

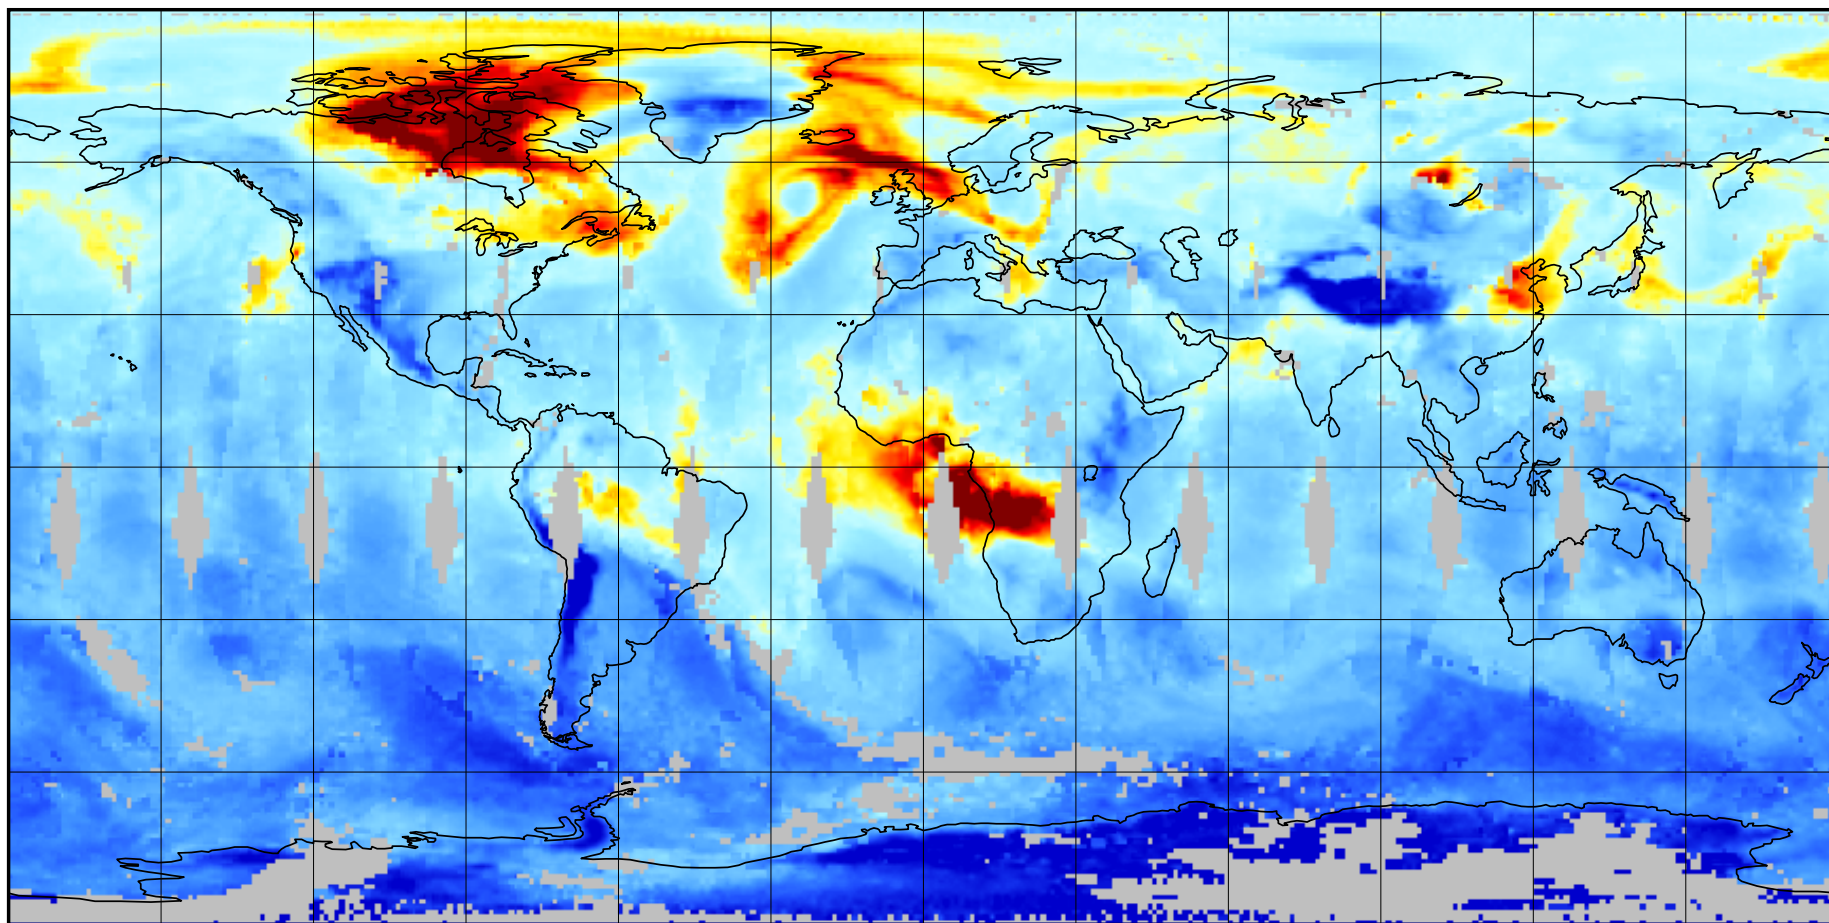

Total column CO (molecules/cm<sup>2</sup>)



Data Min = 7.5, Max = 40.8, Mean = 16.1



TotCO\_A

22 August

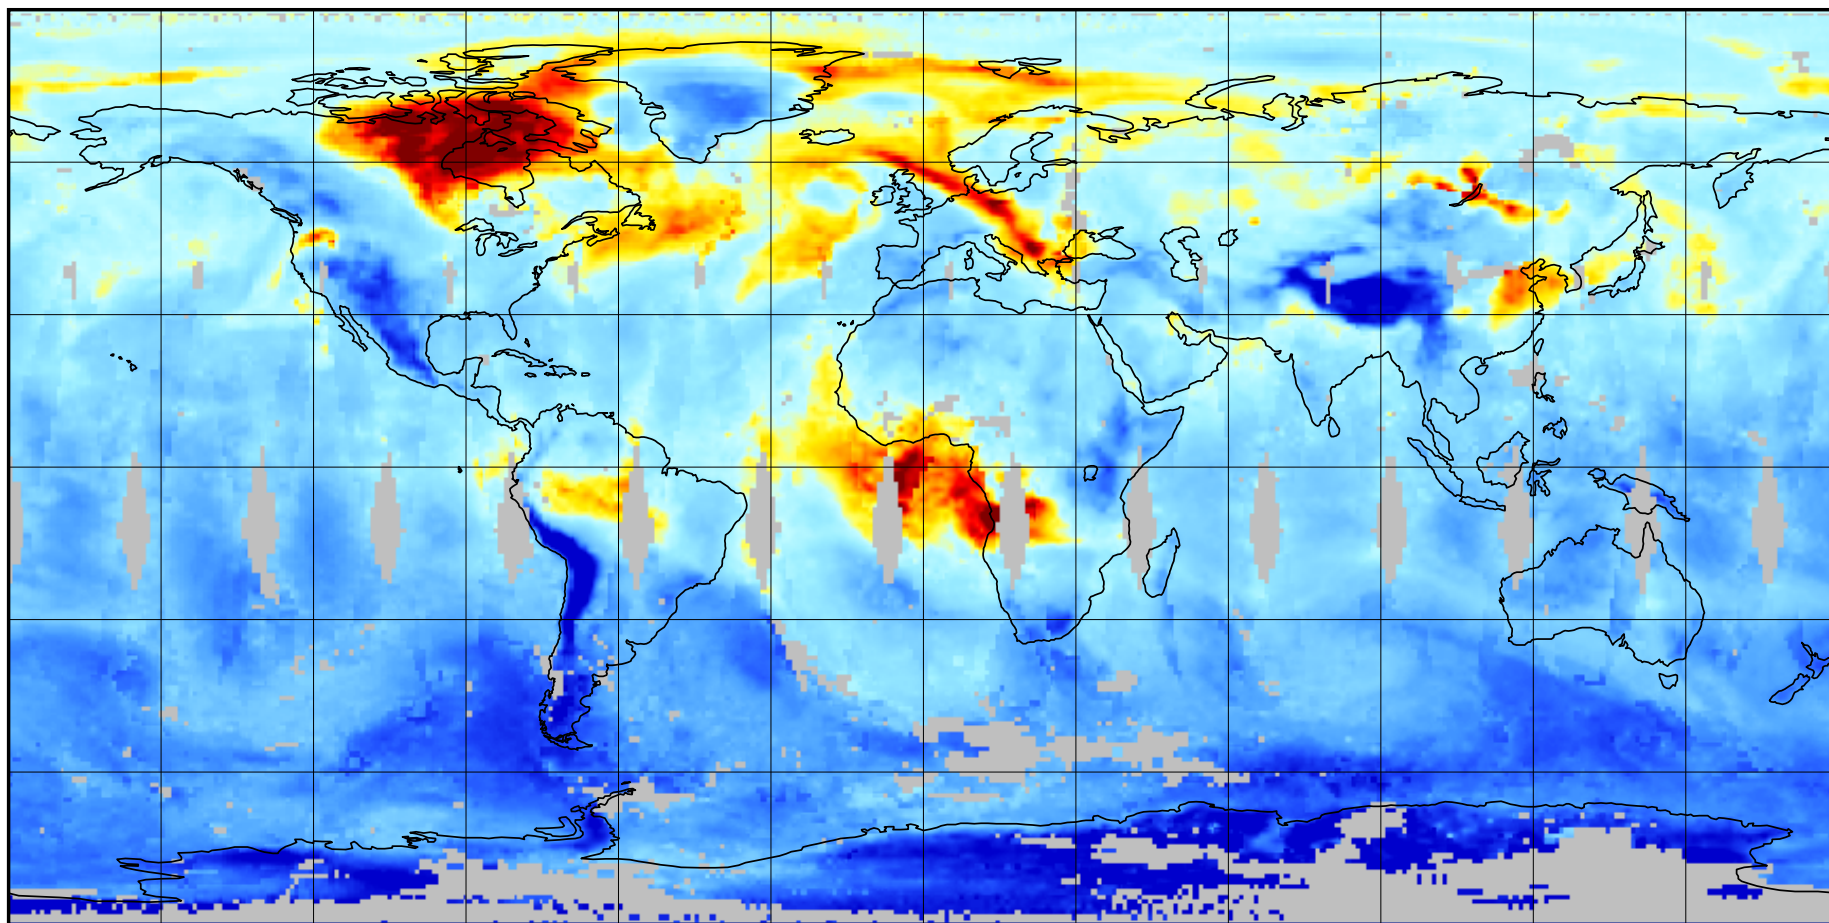

Total column CO (molecules/cm<sup>2</sup>)



Data Min = 7.3, Max = 37.5, Mean = 16.1

TotCO\_A

23 August

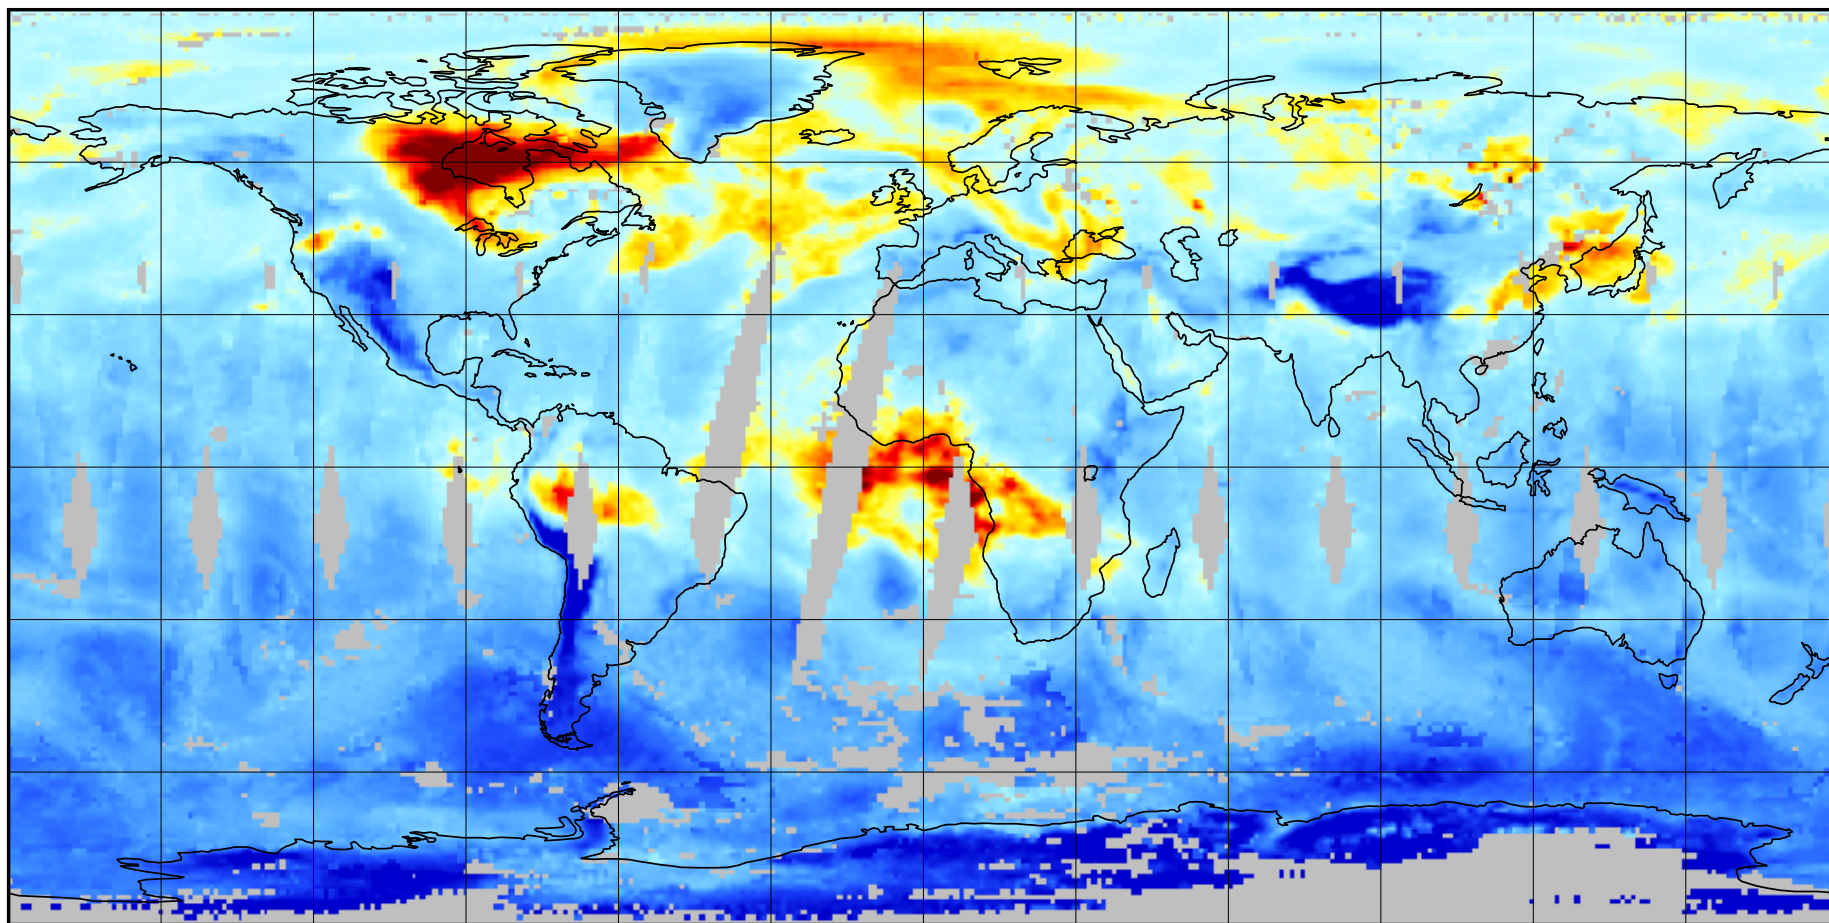

Total column CO (molecules/cm<sup>2</sup>)



Data Min = 6.6, Max = 33.8, Mean = 16.1

TotCO\_A

24 August

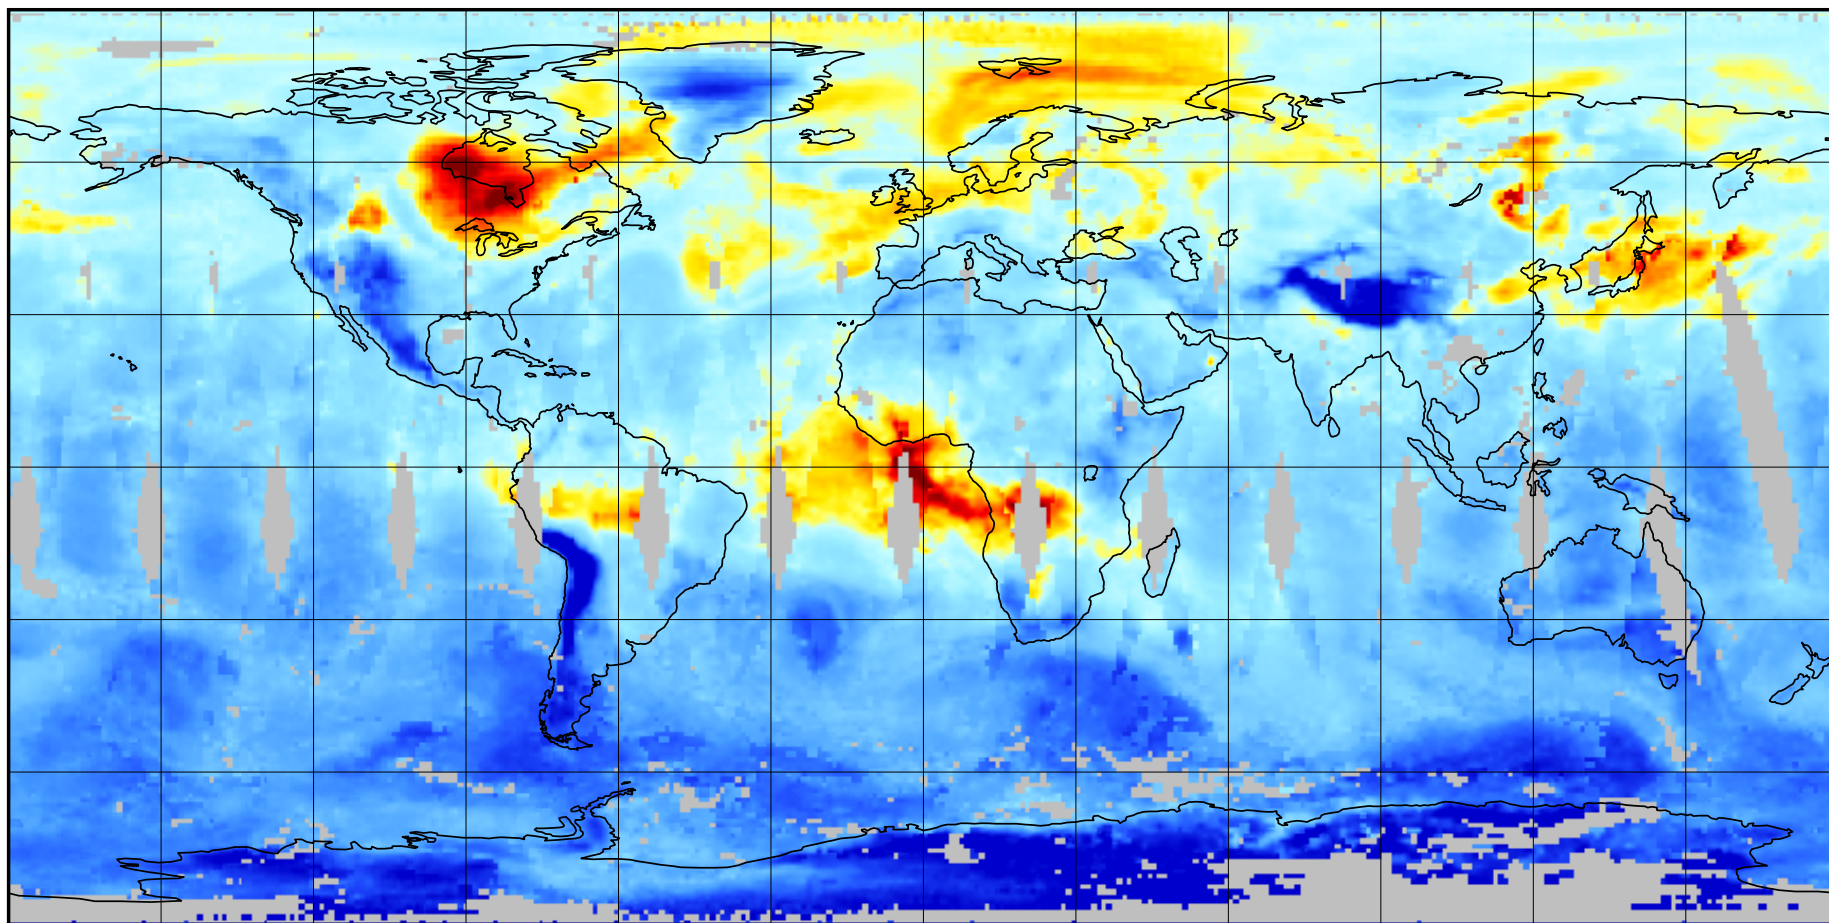

Total column CO (molecules/cm<sup>2</sup>)



Data Min = 7.1, Max = 32.0, Mean = 16.1



TotCO\_A

25 August

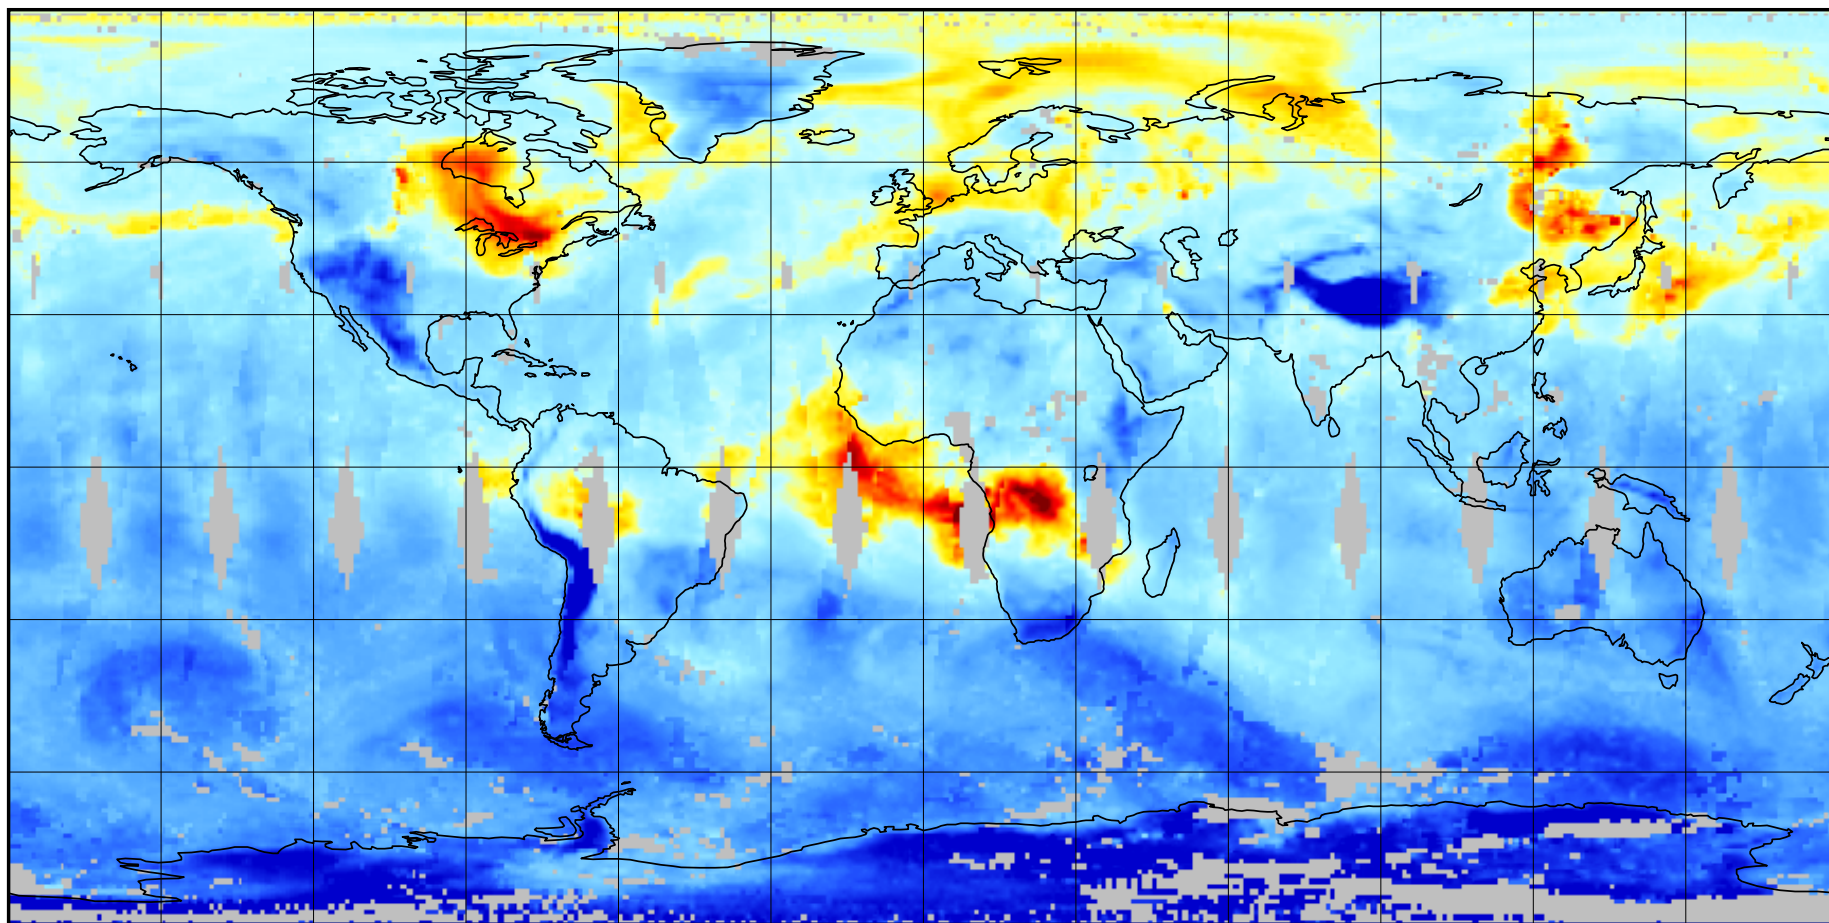

Total column CO (molecules/cm<sup>2</sup>)



Data Min = 6.5, Max = 31.7, Mean = 16.1

TotCO\_A

26 August

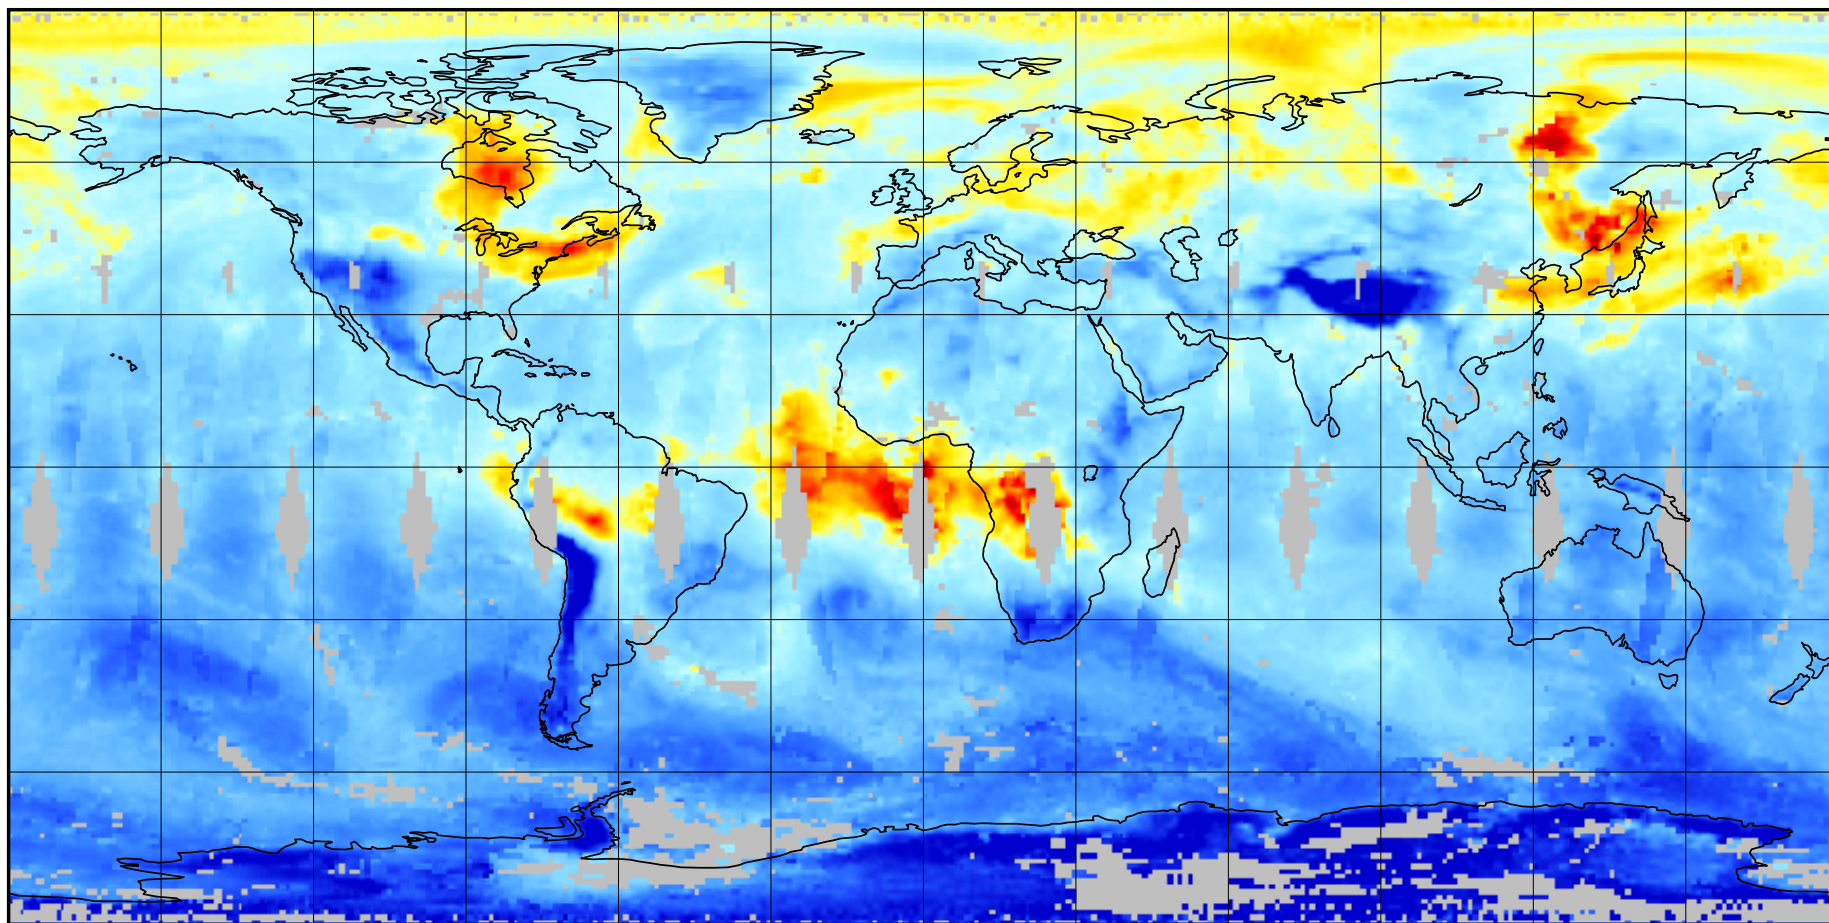

Total column CO (molecules/cm<sup>2</sup>)



Data Min = 7.1, Max = 29.4, Mean = 16.1



TotCO\_A

27 August

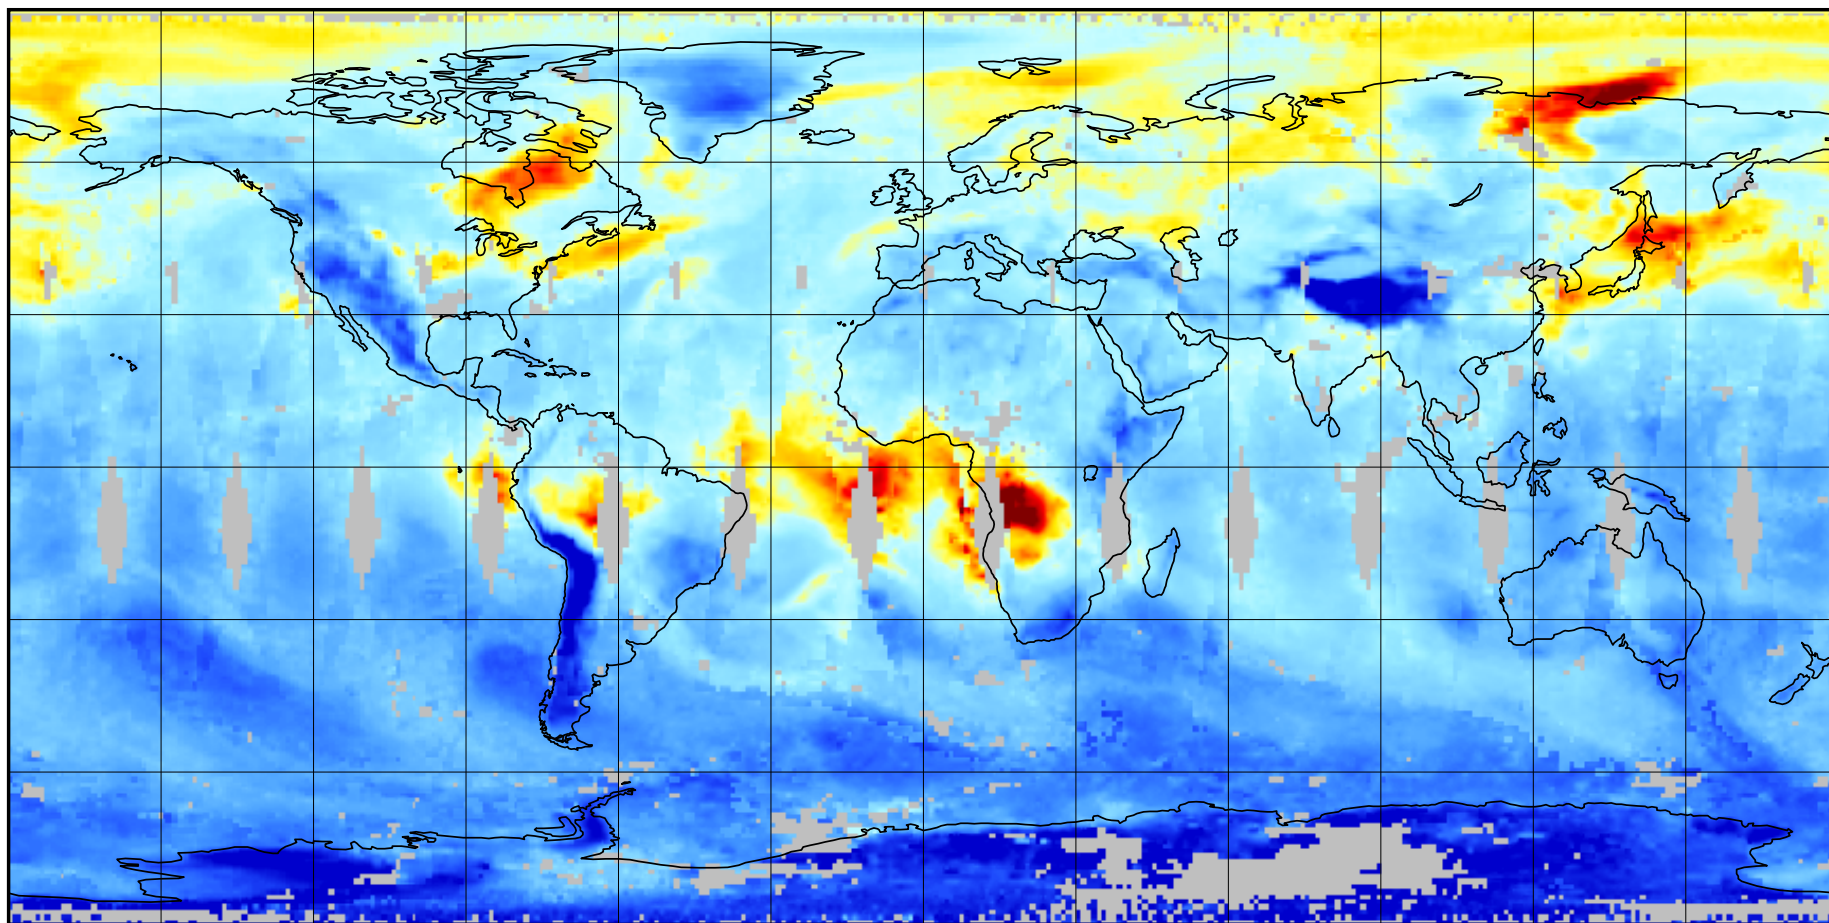

Total column CO (molecules/cm<sup>2</sup>)

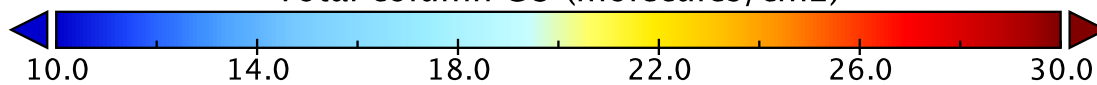

Data Min = 7.2, Max = 37.8, Mean = 16.1



TotCO\_A

28 August

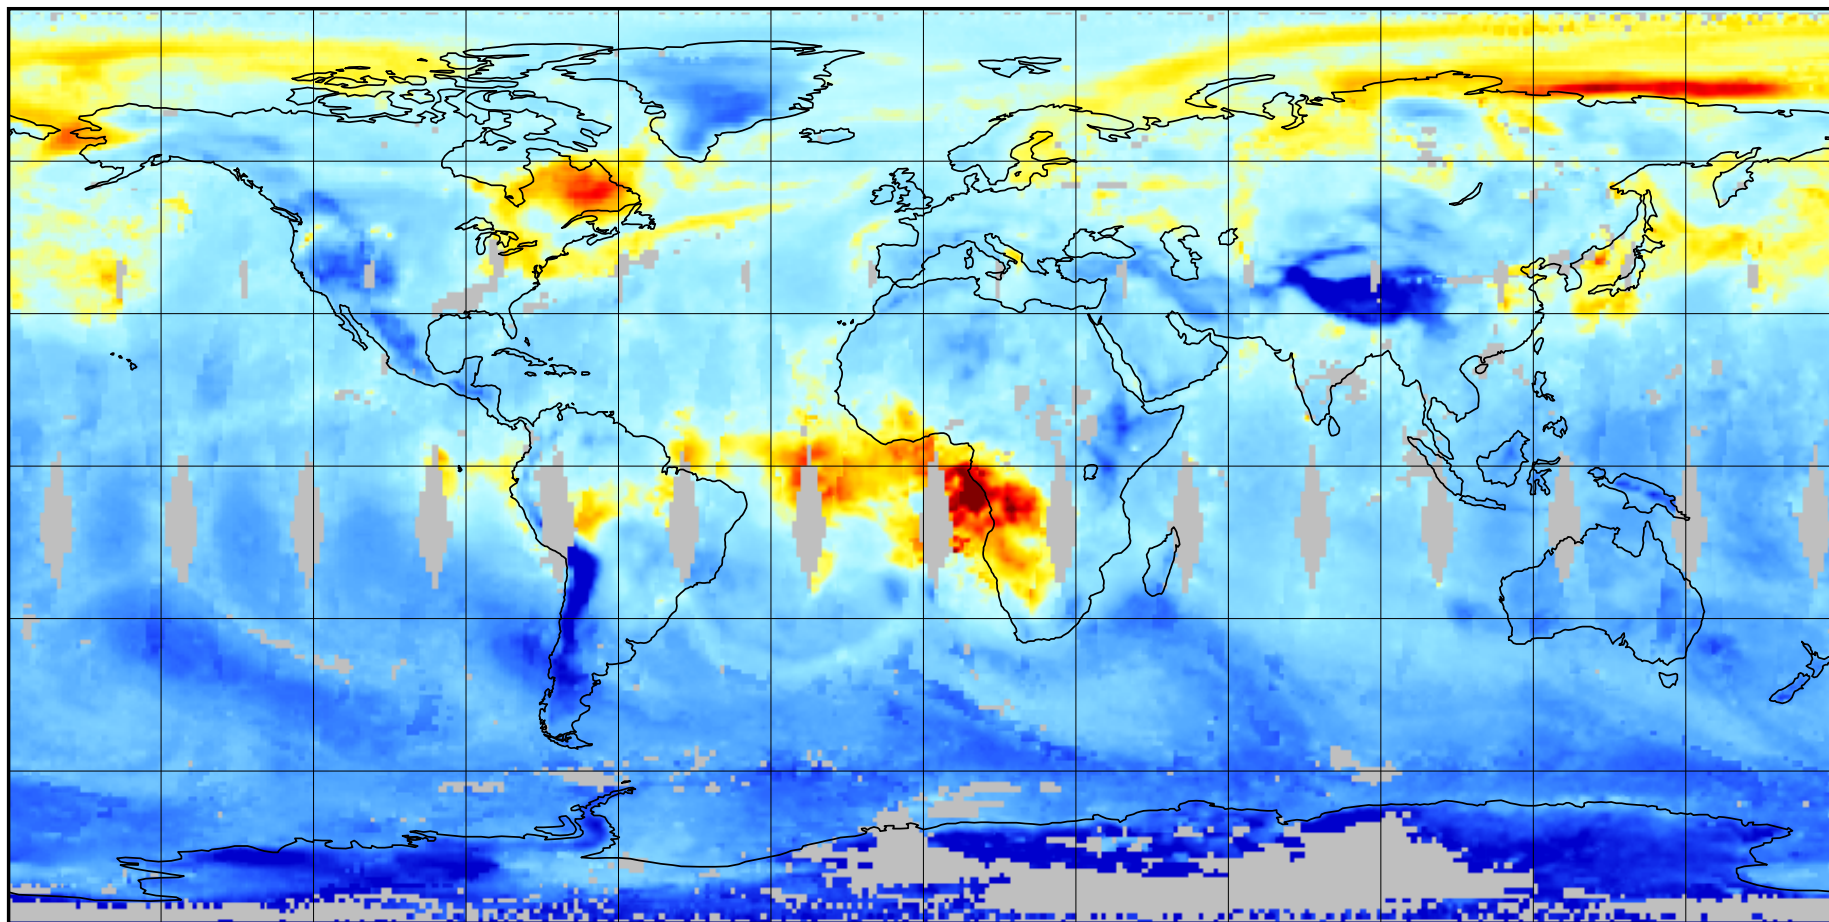

Combine (TotCO\_A, TotCO\_D) ( $10^{17}$  1)

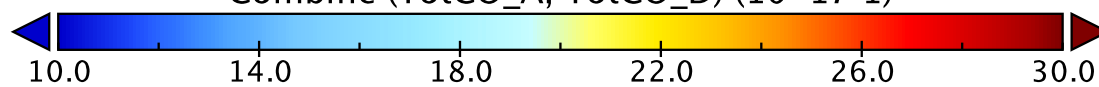

Data Min = 7.6, Max = 33.7, Mean = 16.2

TotCO\_A

29 August

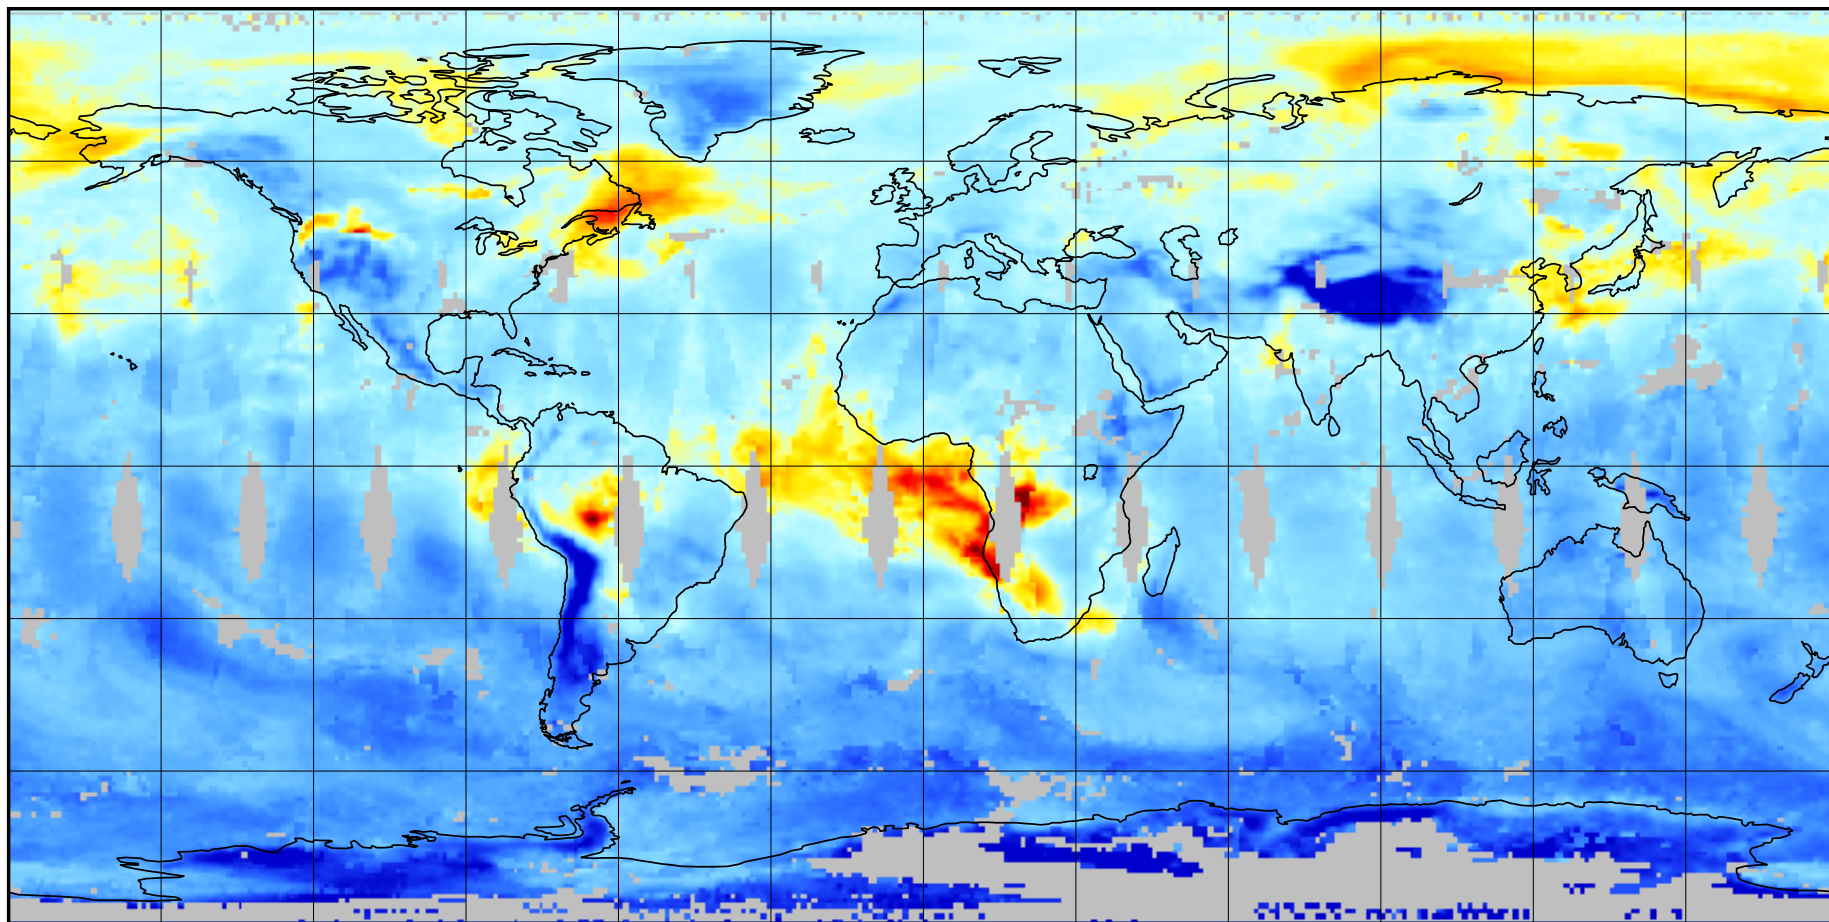

Total column CO (molecules/cm<sup>2</sup>)



Data Min = 8.1, Max = 32.8, Mean = 16.2

TotCO\_A

30 August

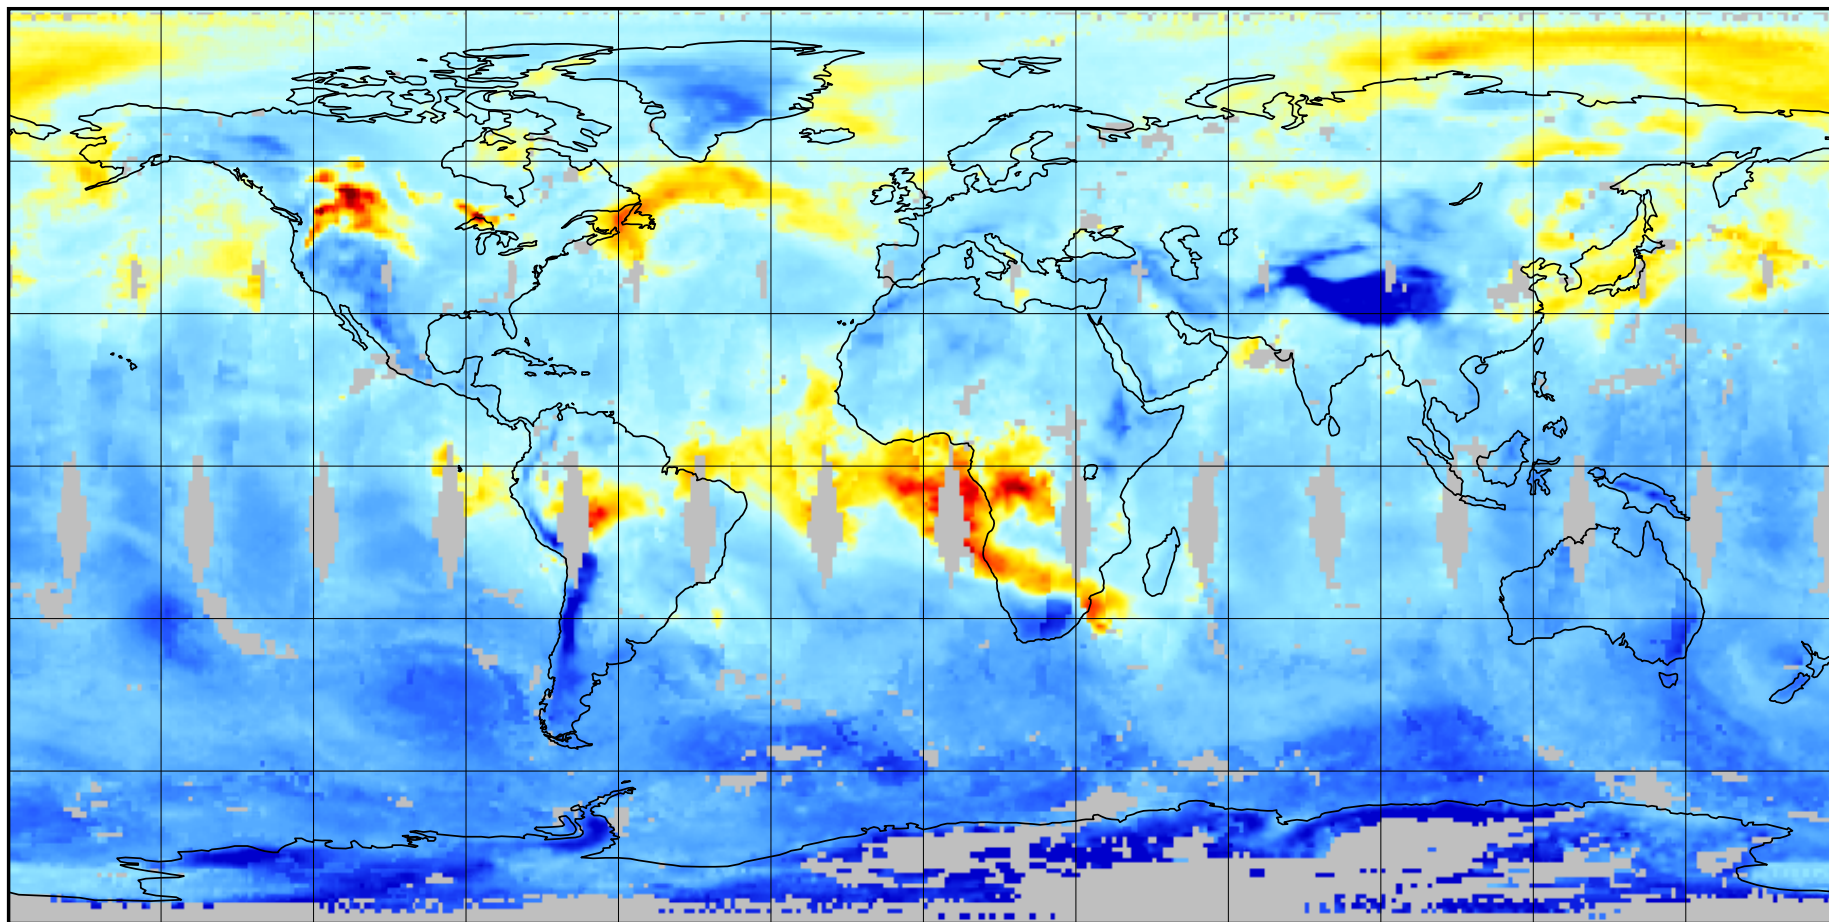

Total column CO (molecules/cm<sup>2</sup>)

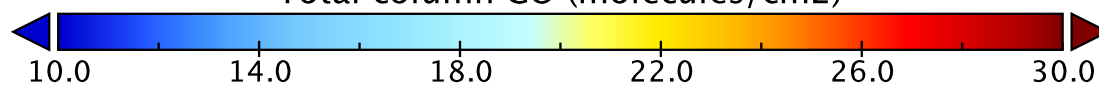

Data Min = 7.7, Max = 36.1, Mean = 16.3



TotCO\_A

31 August

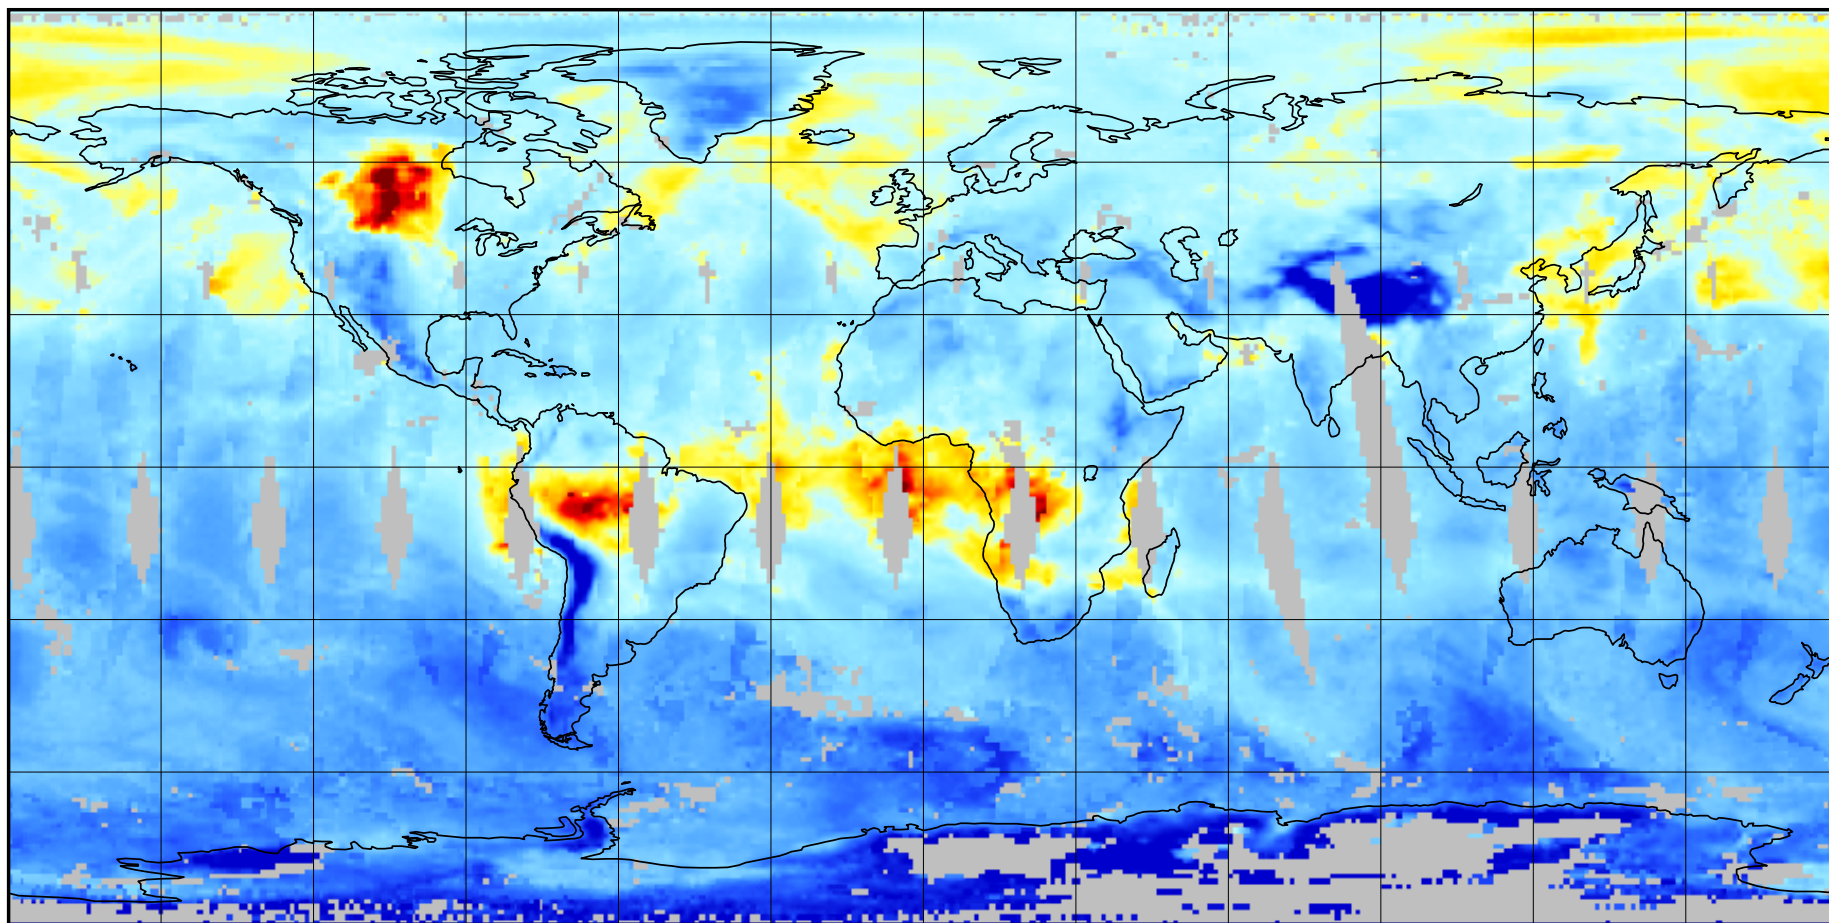

Total column CO (molecules/cm<sup>2</sup>)



Data Min = 7.6, Max = 34.9, Mean = 16.3
