# Supplementary material for: A study of long-range transported smoke aerosols in the Upper Troposphere/Lower Stratosphere
Source: Copernicus journal article supplement (doi:10.5194/acp-2018-655), 2018-07-09
Supplement: Supplementary file 2 [file acp-2018-655-supplement.zip]

11 August 2017

## UV Aerosol Index

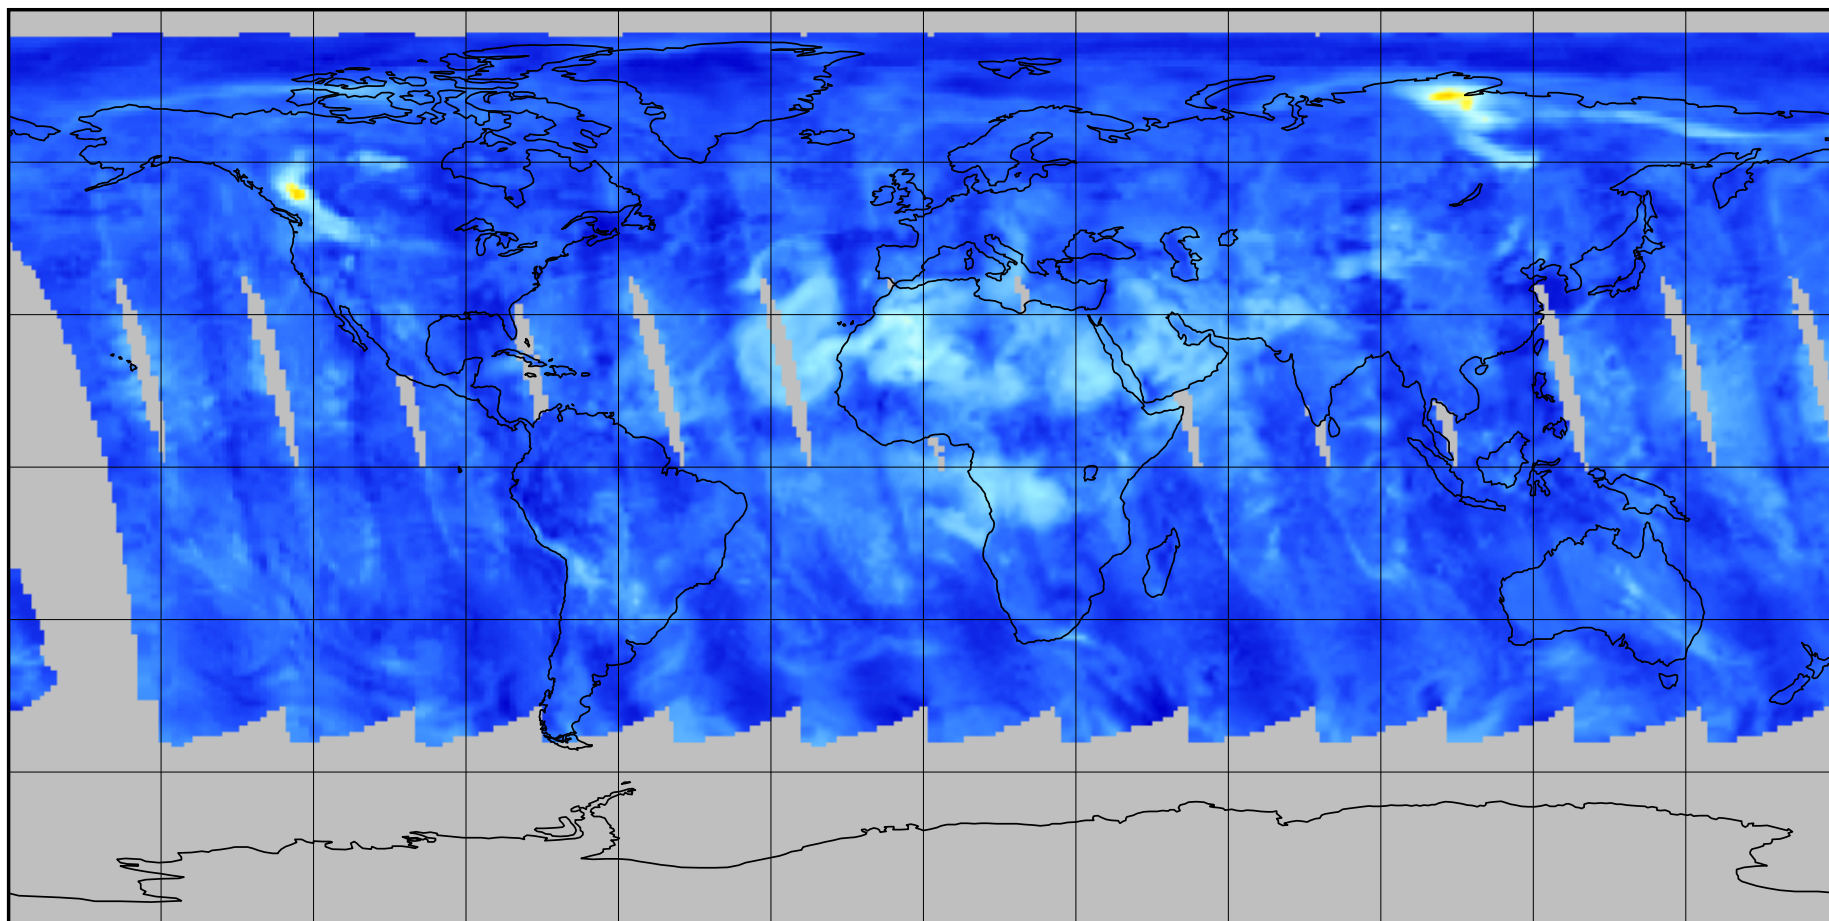

UV aerosol index

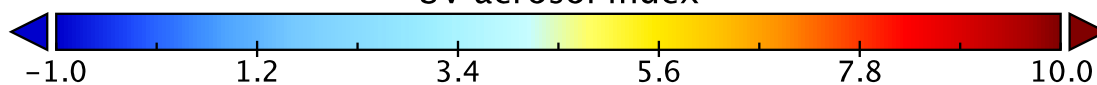

Data Min = -1.1, Max = 6.3, Mean = 0.2

12 August 2017

## UV Aerosol Index

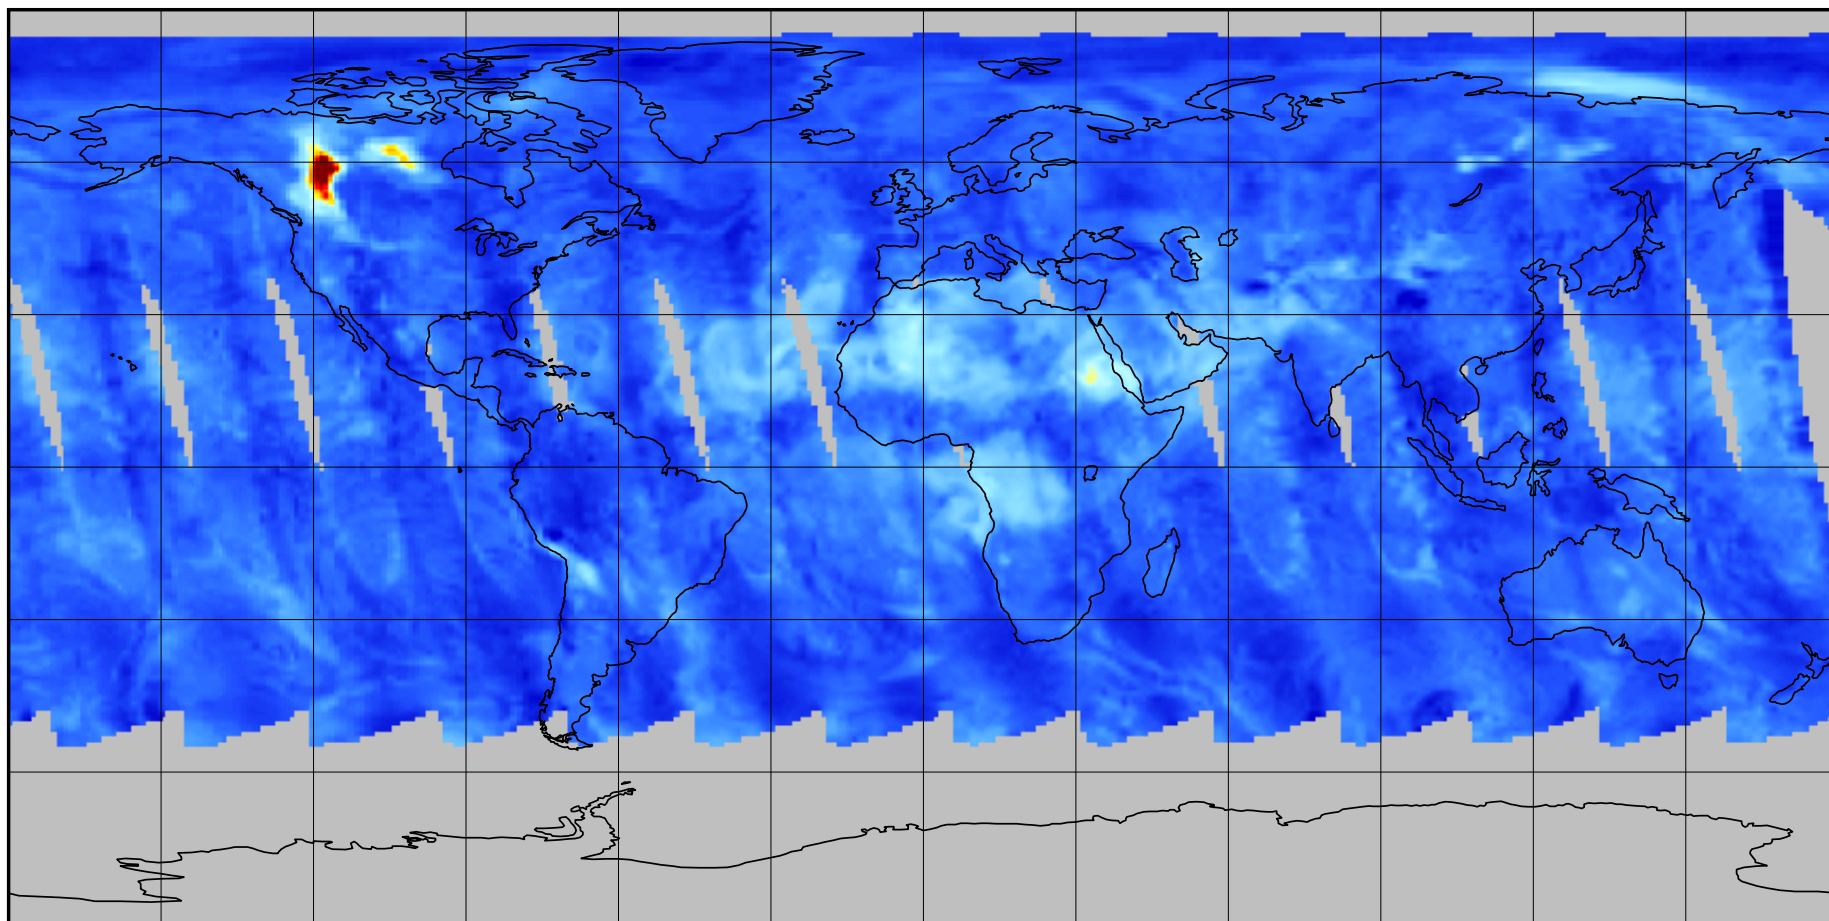

UV aerosol index



Data Min = -1.3, Max = 14.4, Mean = 0.2

13 August 2017

## UV Aerosol Index

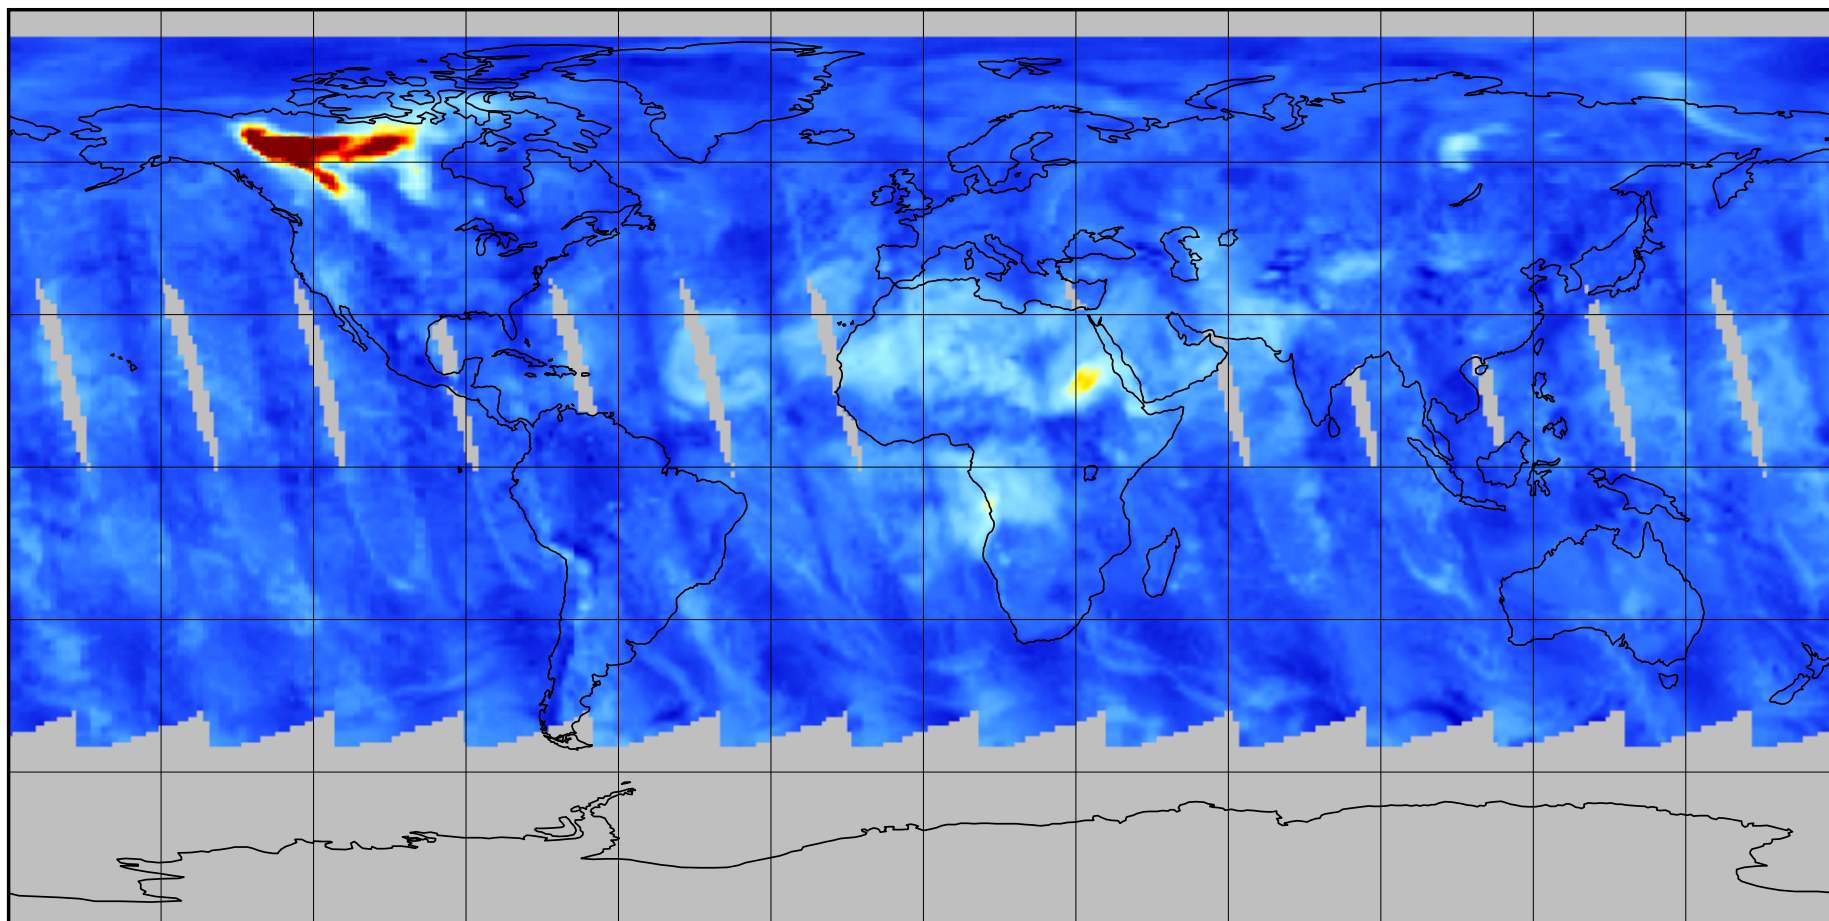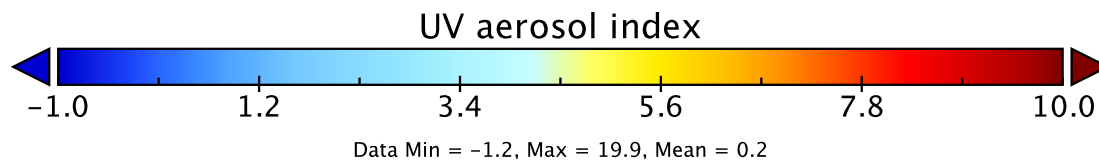



14 August 2017

## UV Aerosol Index

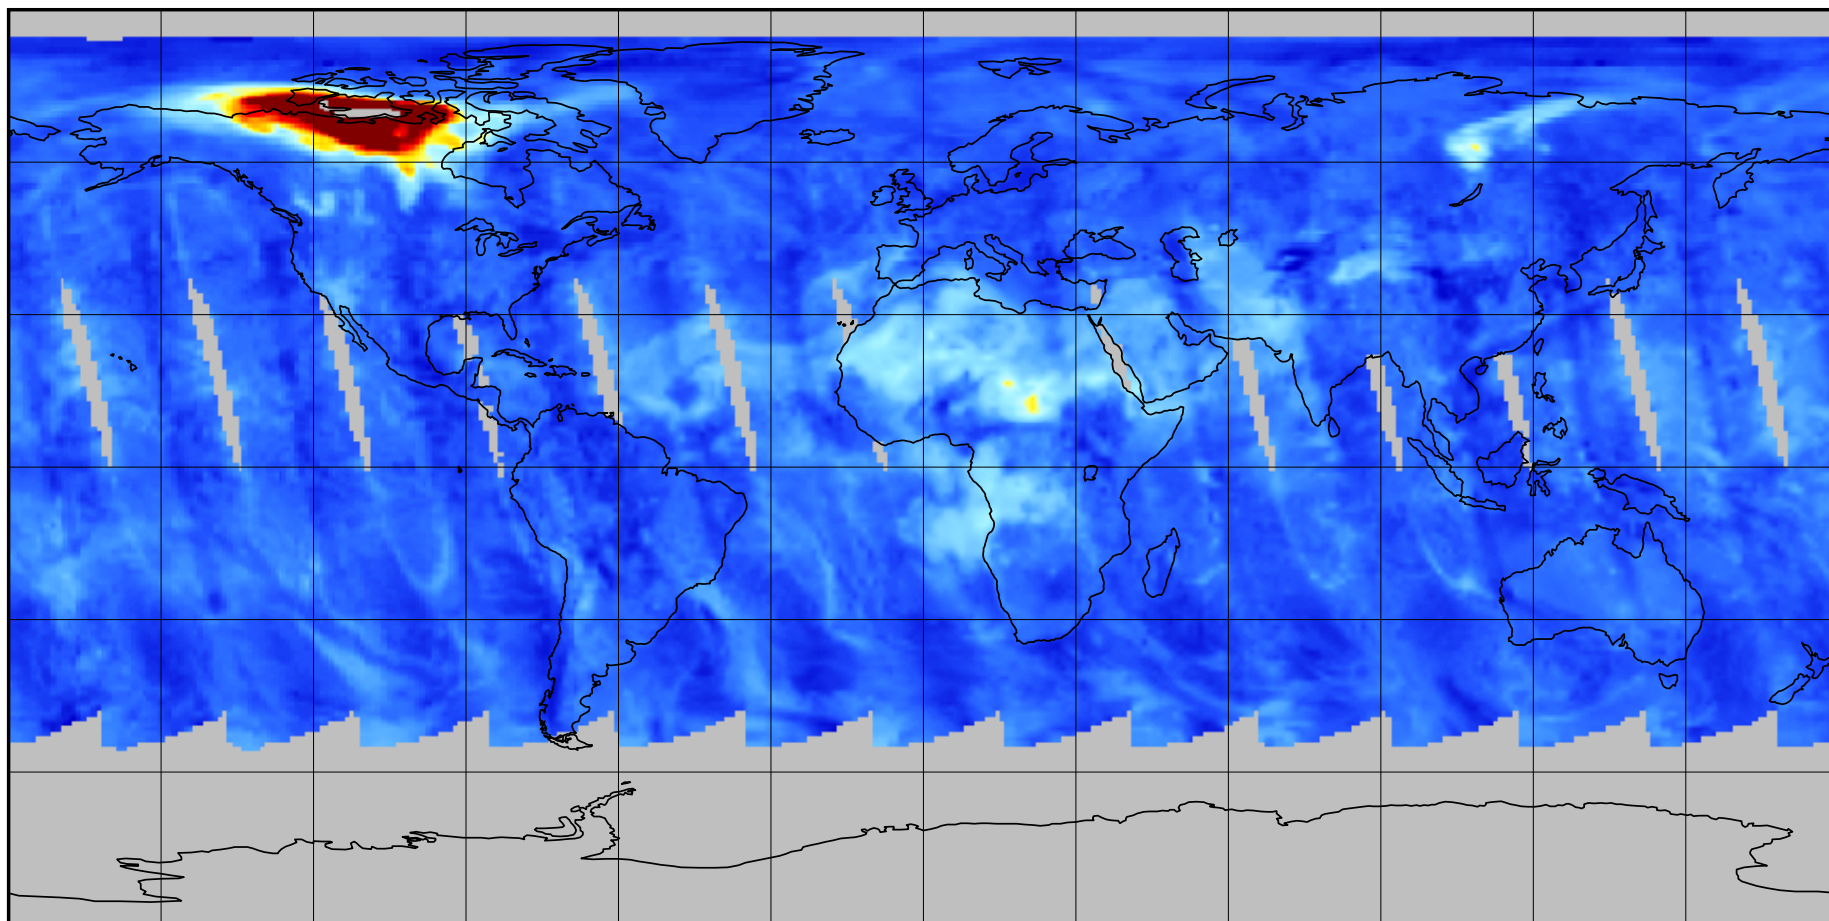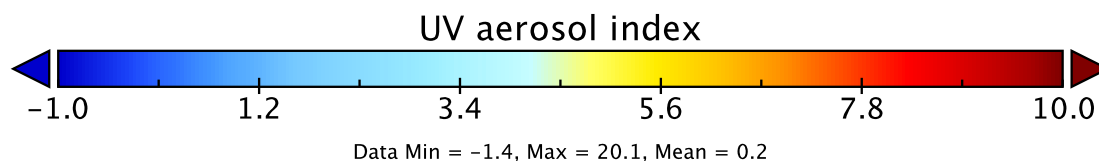

15 August 2017

## UV Aerosol Index

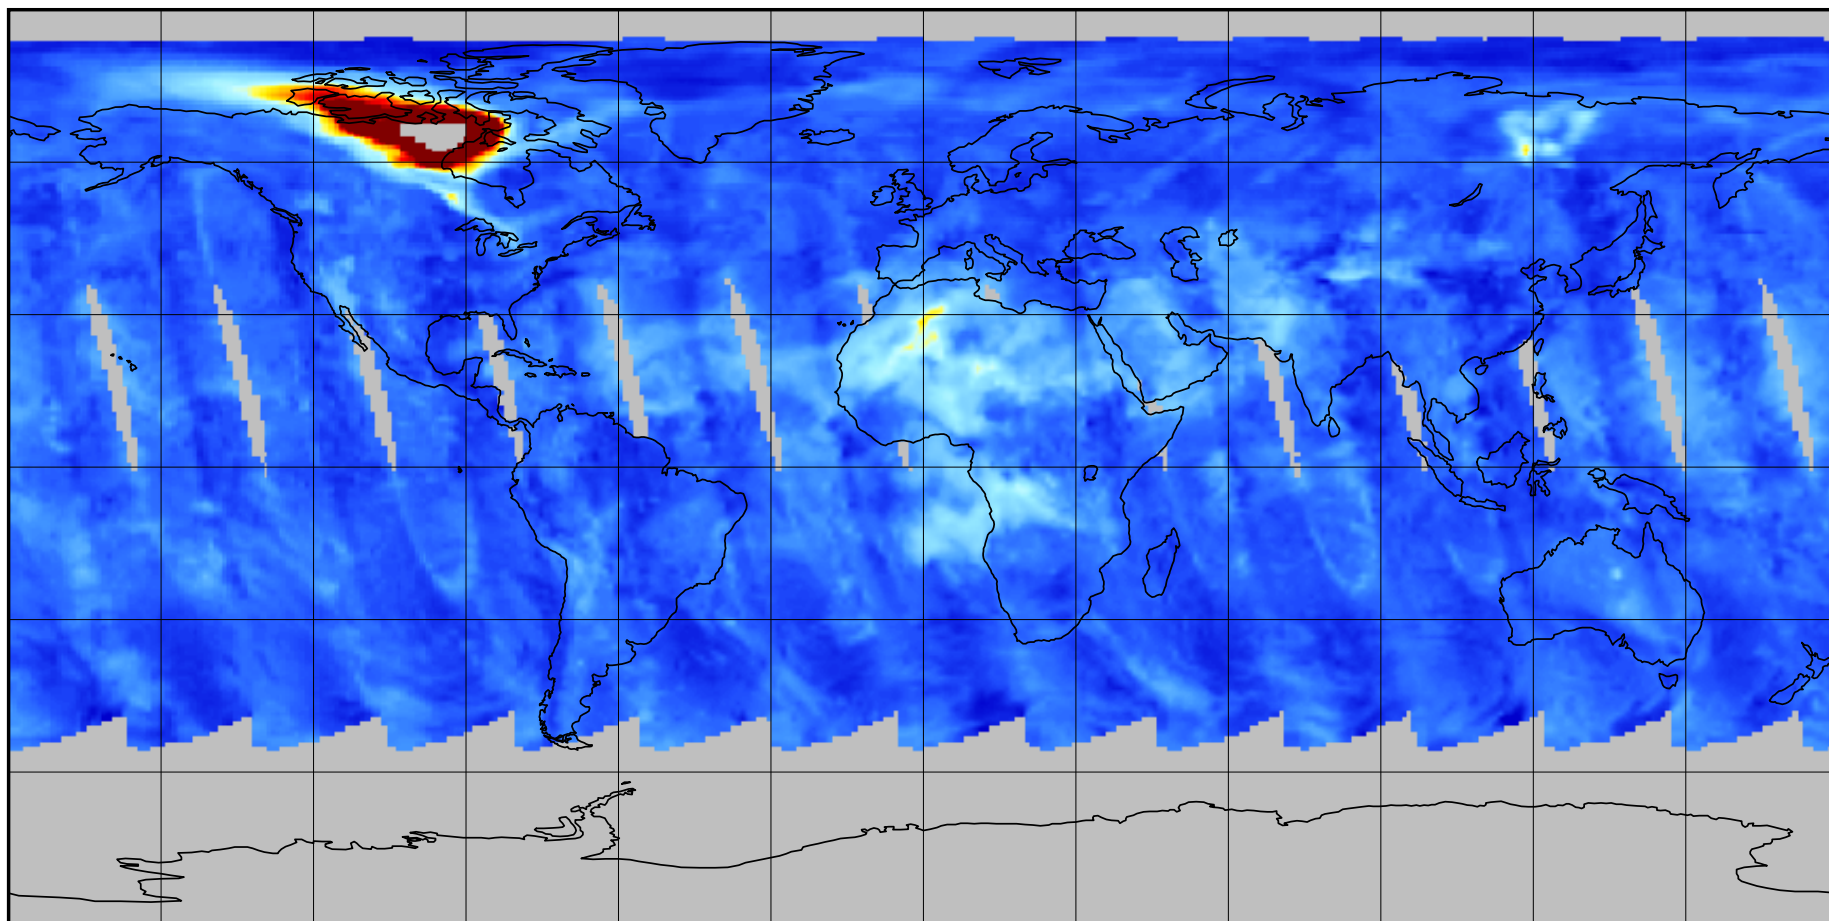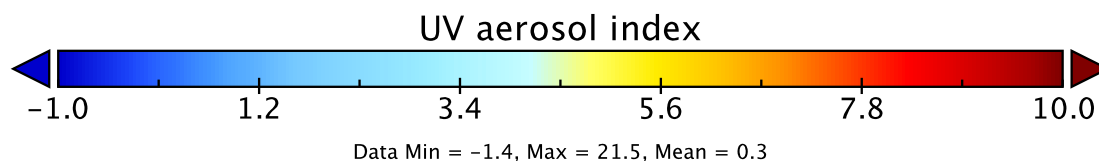

16 August 2017

## UV Aerosol Index

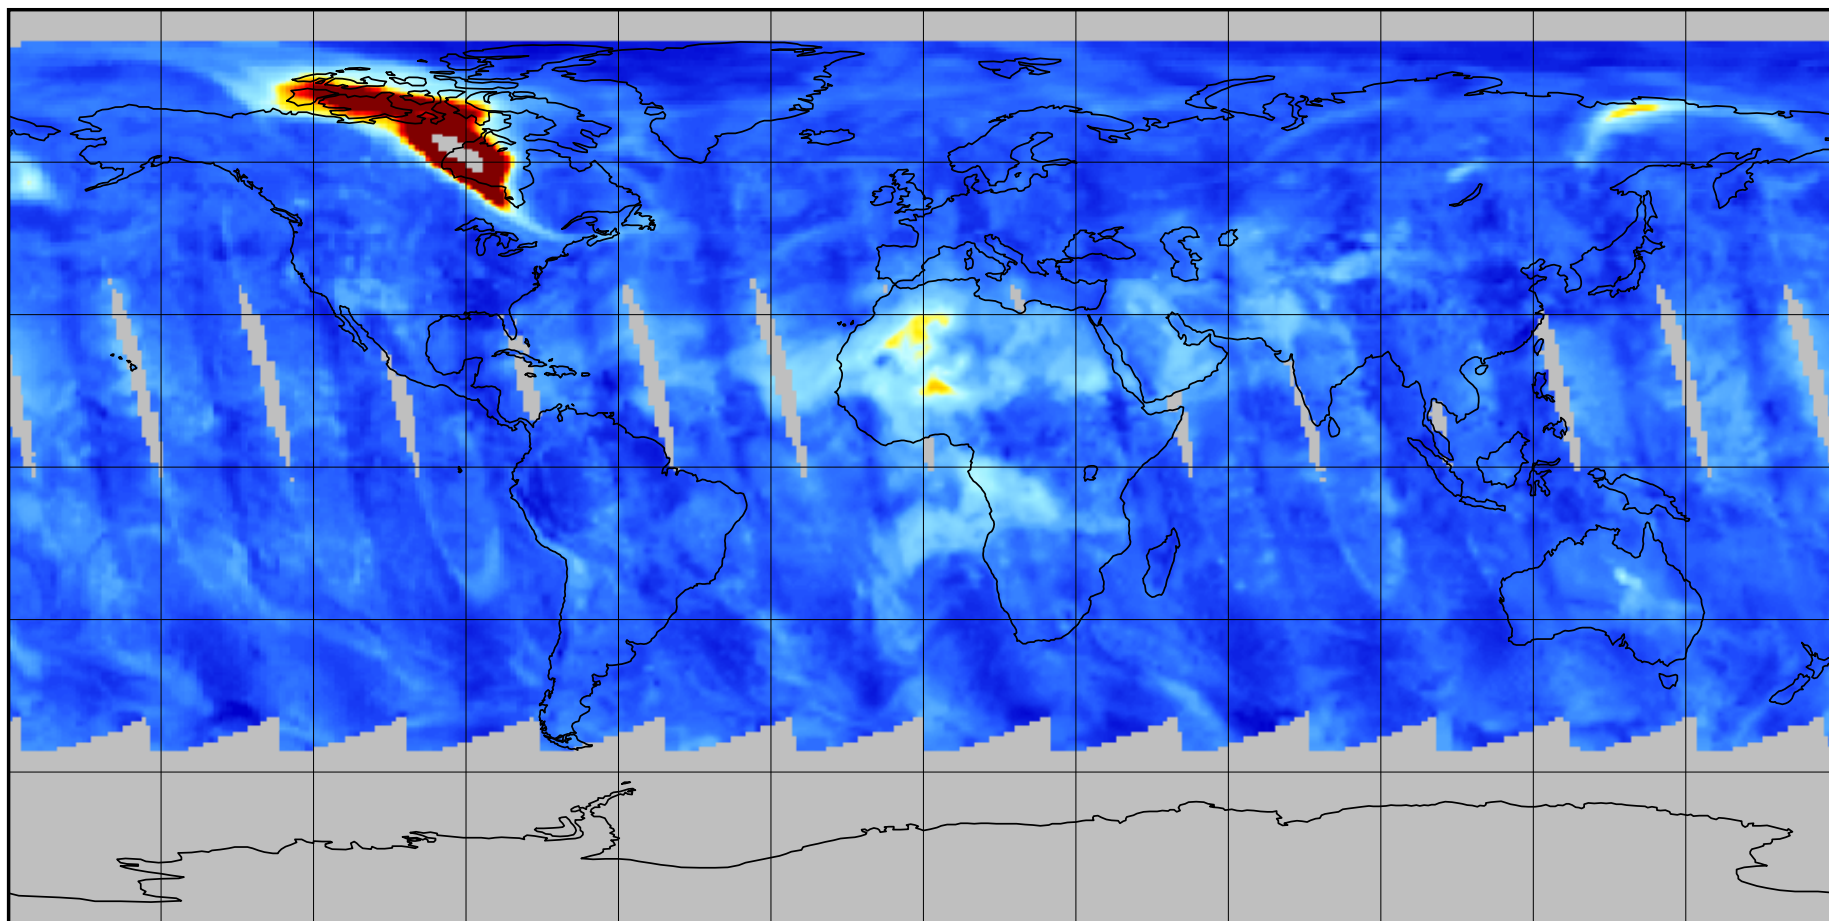

UV aerosol index

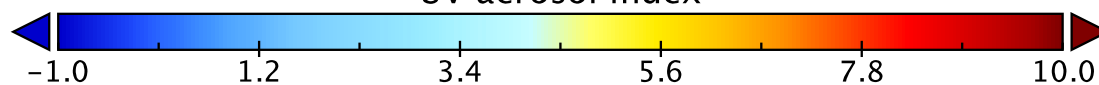

Data Min = -1.2, Max = 20.8, Mean = 0.3



17 August 2017

## UV Aerosol Index

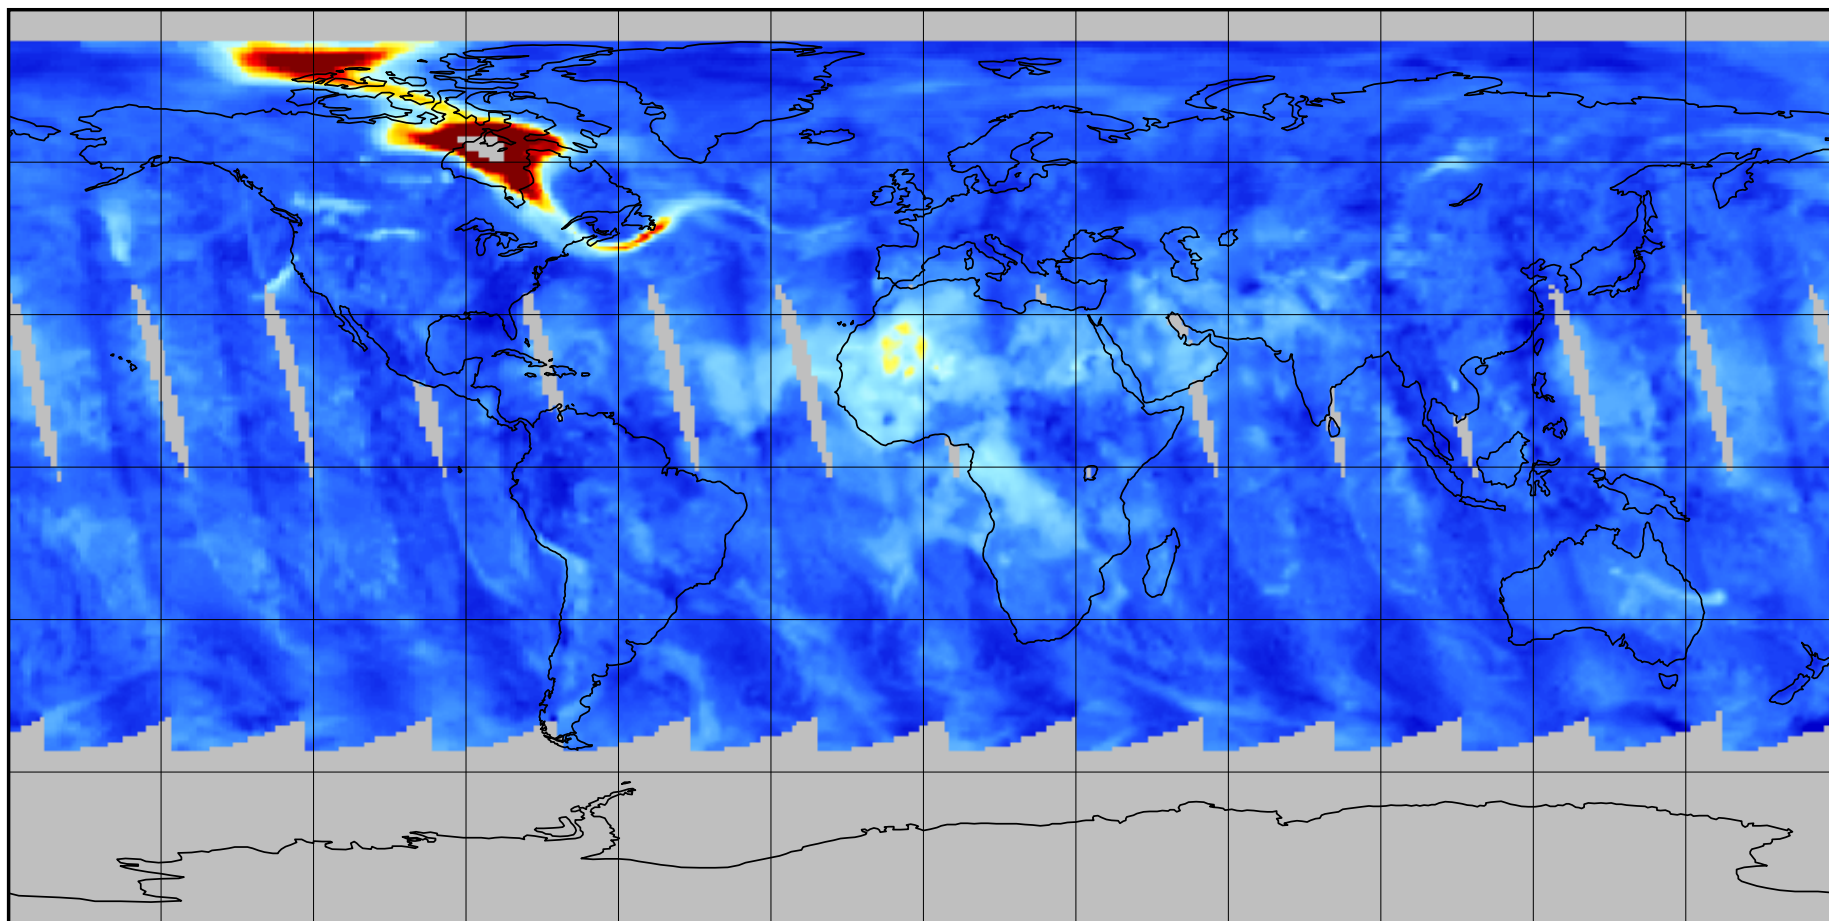

UV aerosol index

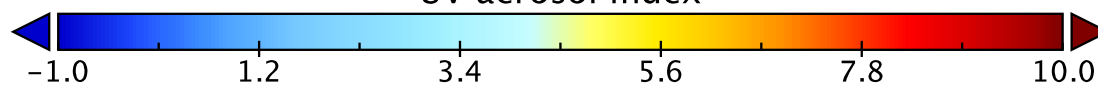

Data Min = -1.4, Max = 20.1, Mean = 0.3

18 August 2017

## UV Aerosol Index

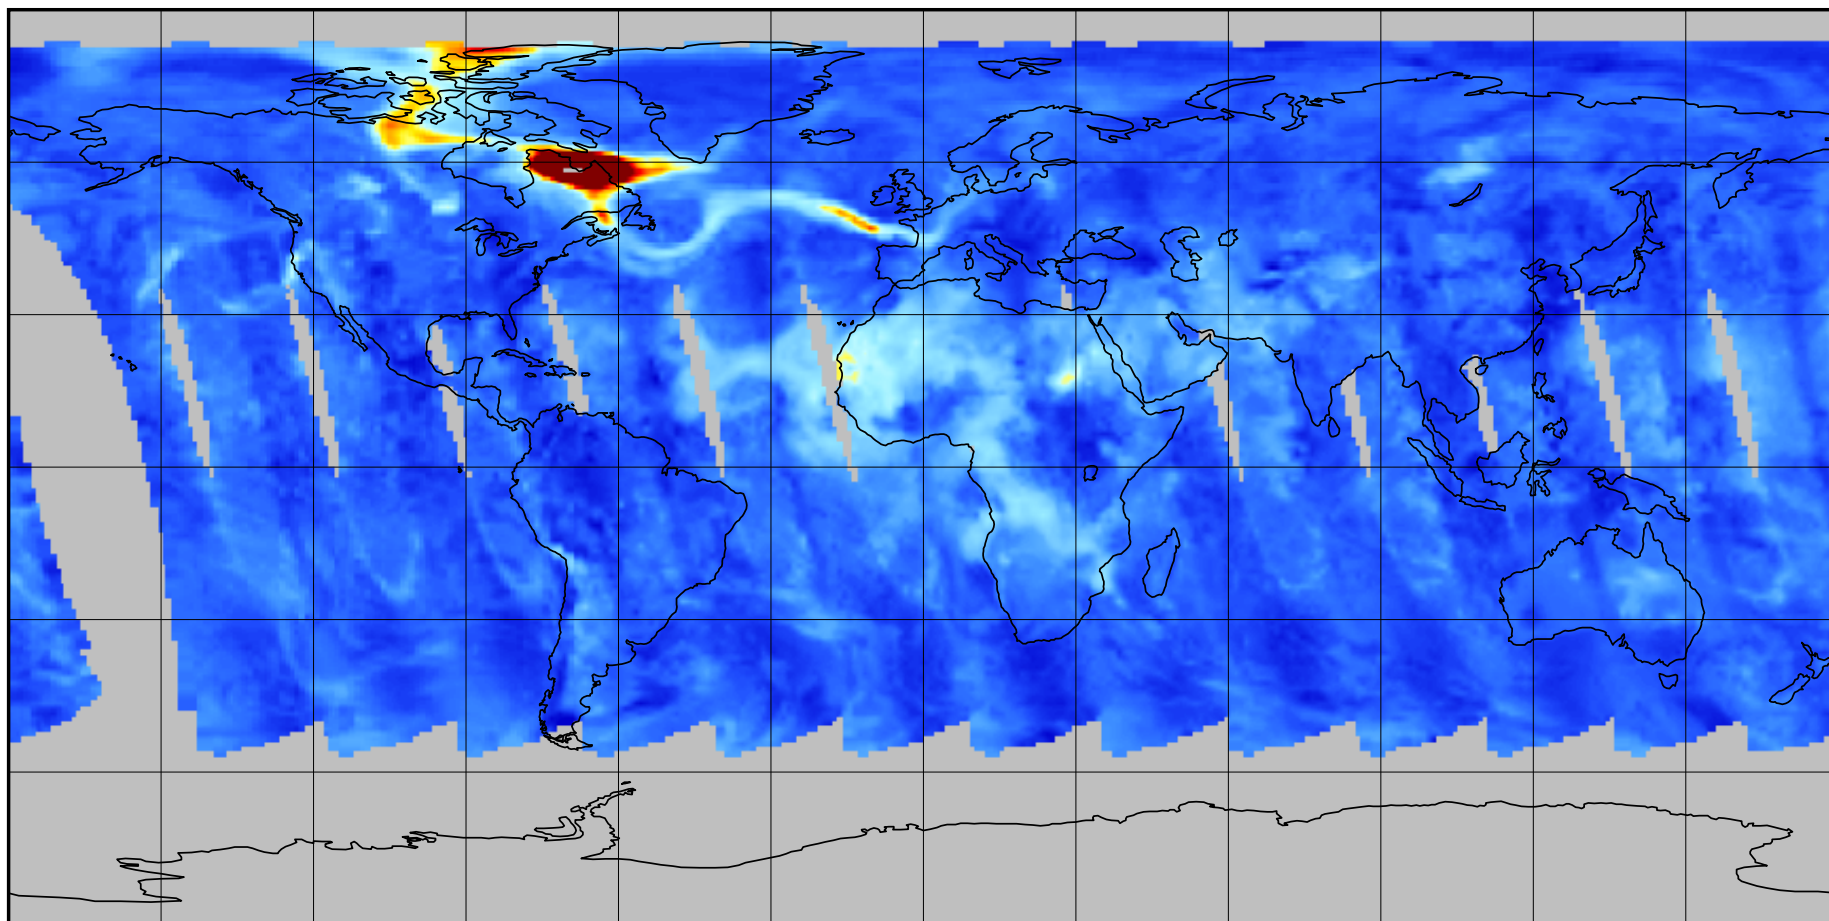

UV aerosol index



Data Min = -1.3, Max = 21.4, Mean = 0.3



19 August 2017

## UV Aerosol Index

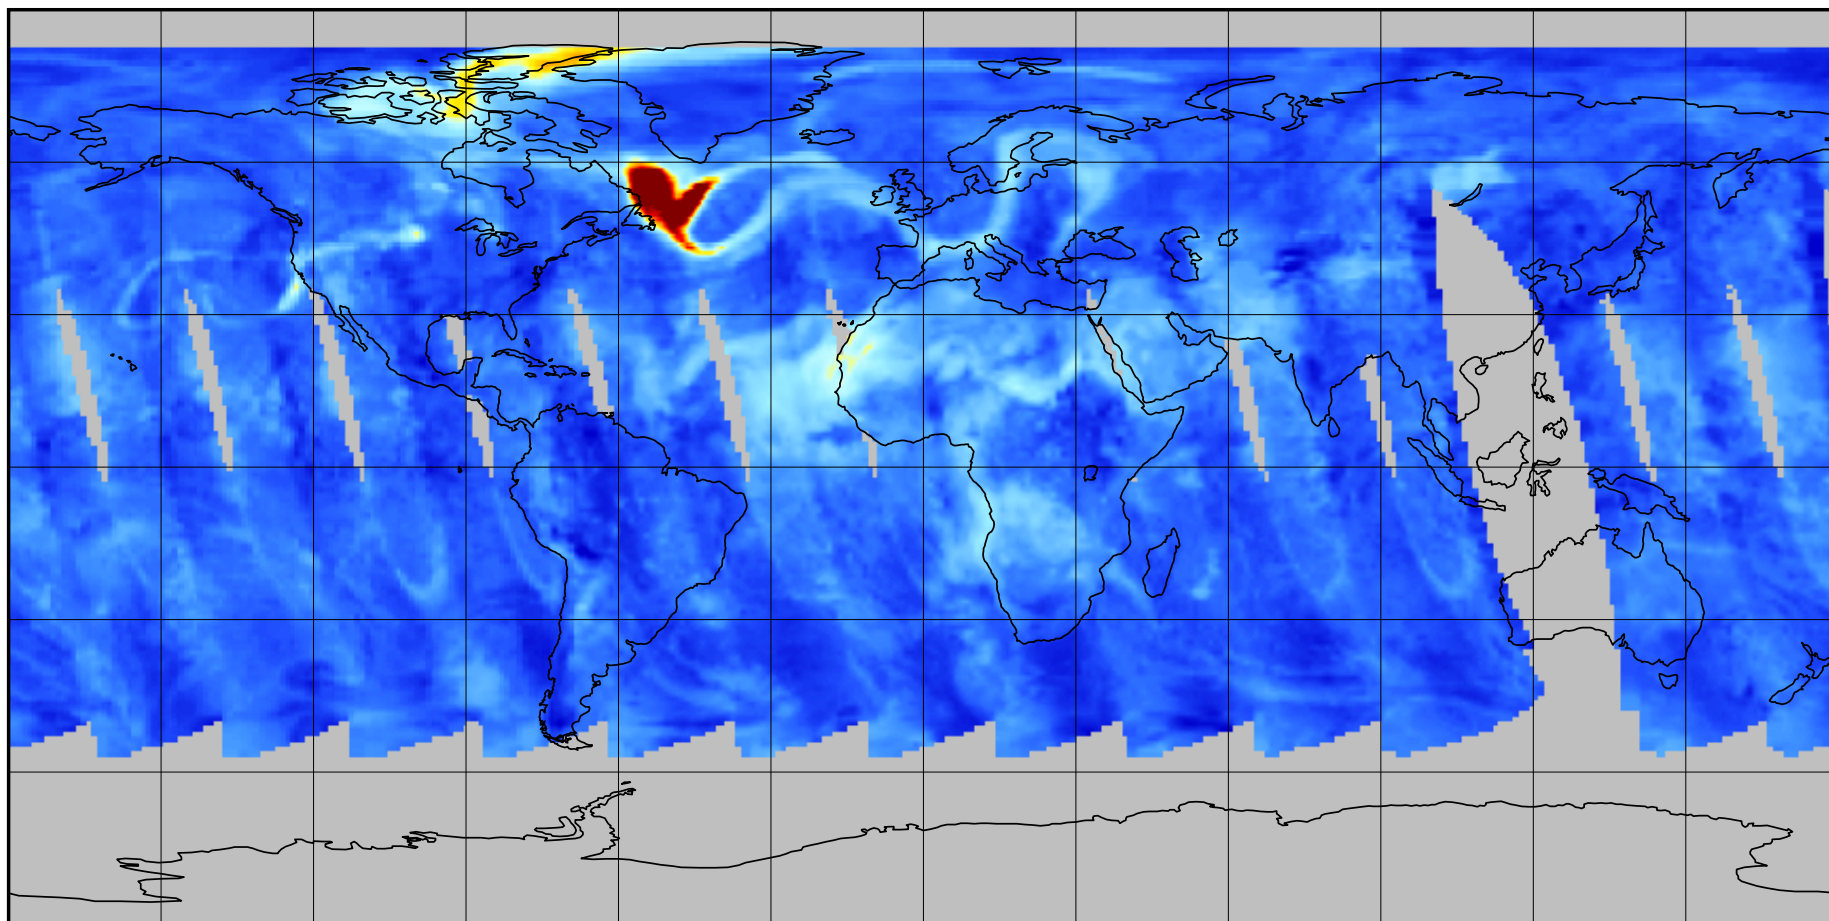

UV aerosol index

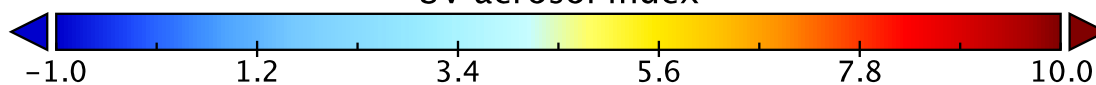

Data Min = -1.6, Max = 17.3, Mean = 0.3

20 August 2017

## UV Aerosol Index

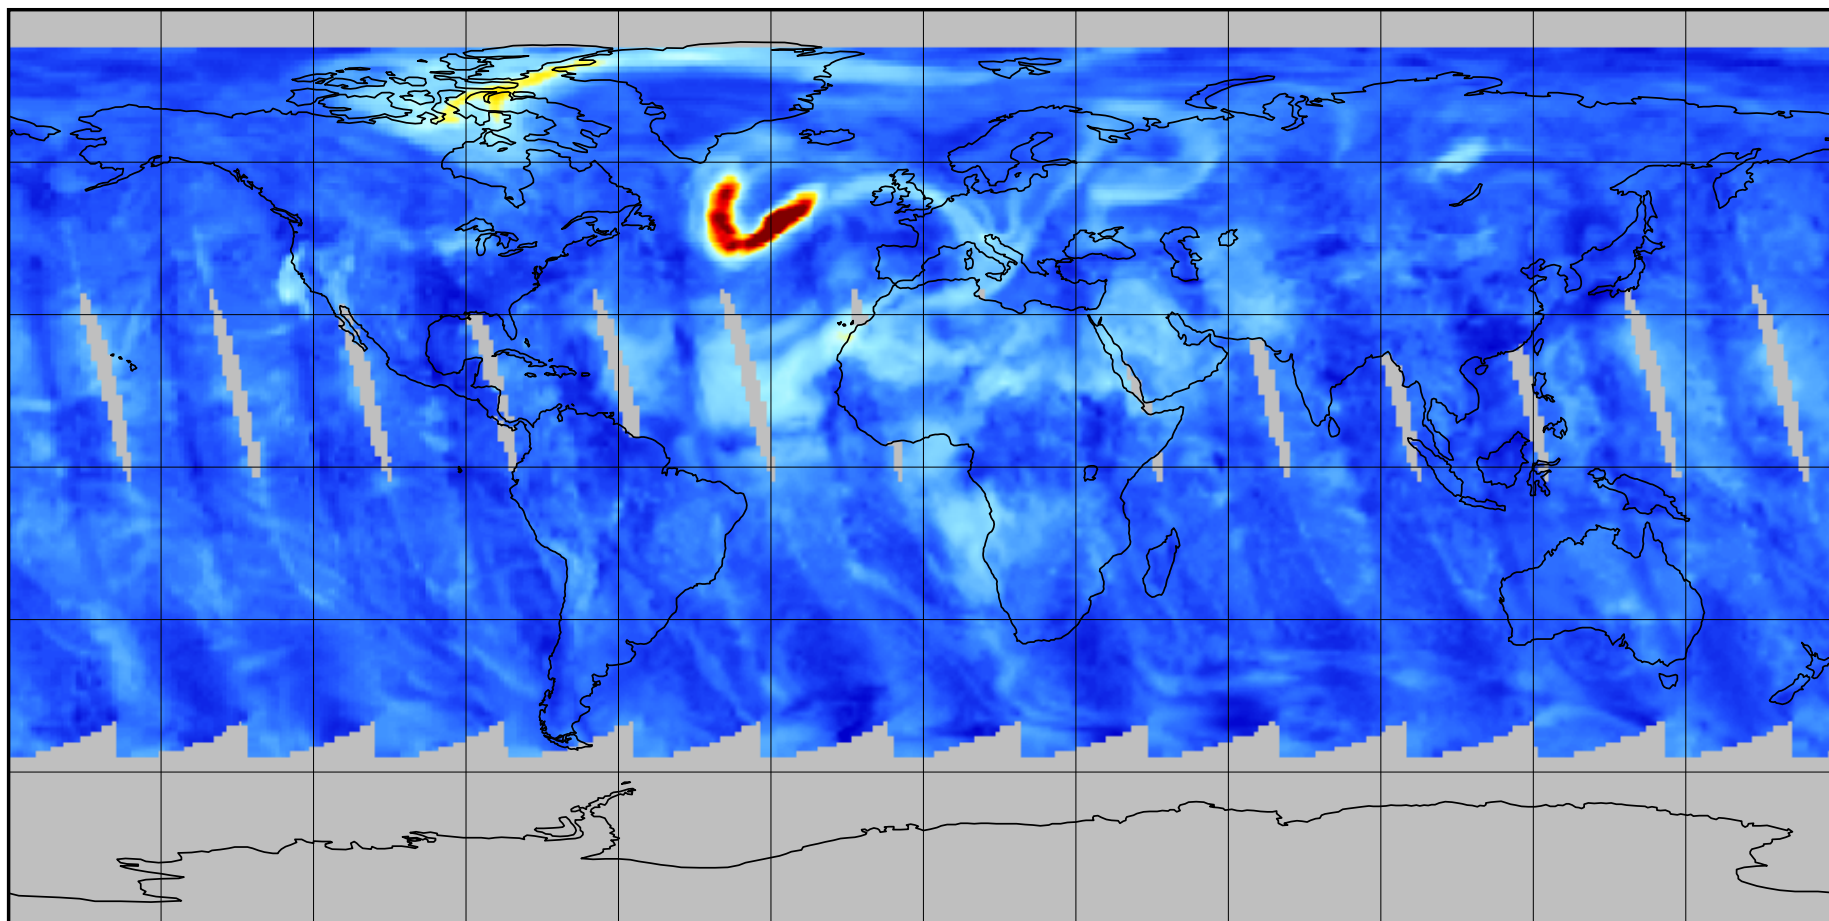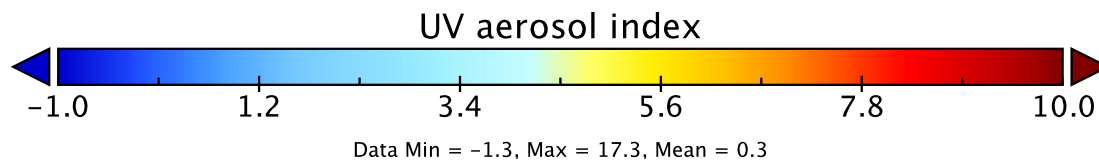

21 August 2017

## UV Aerosol Index

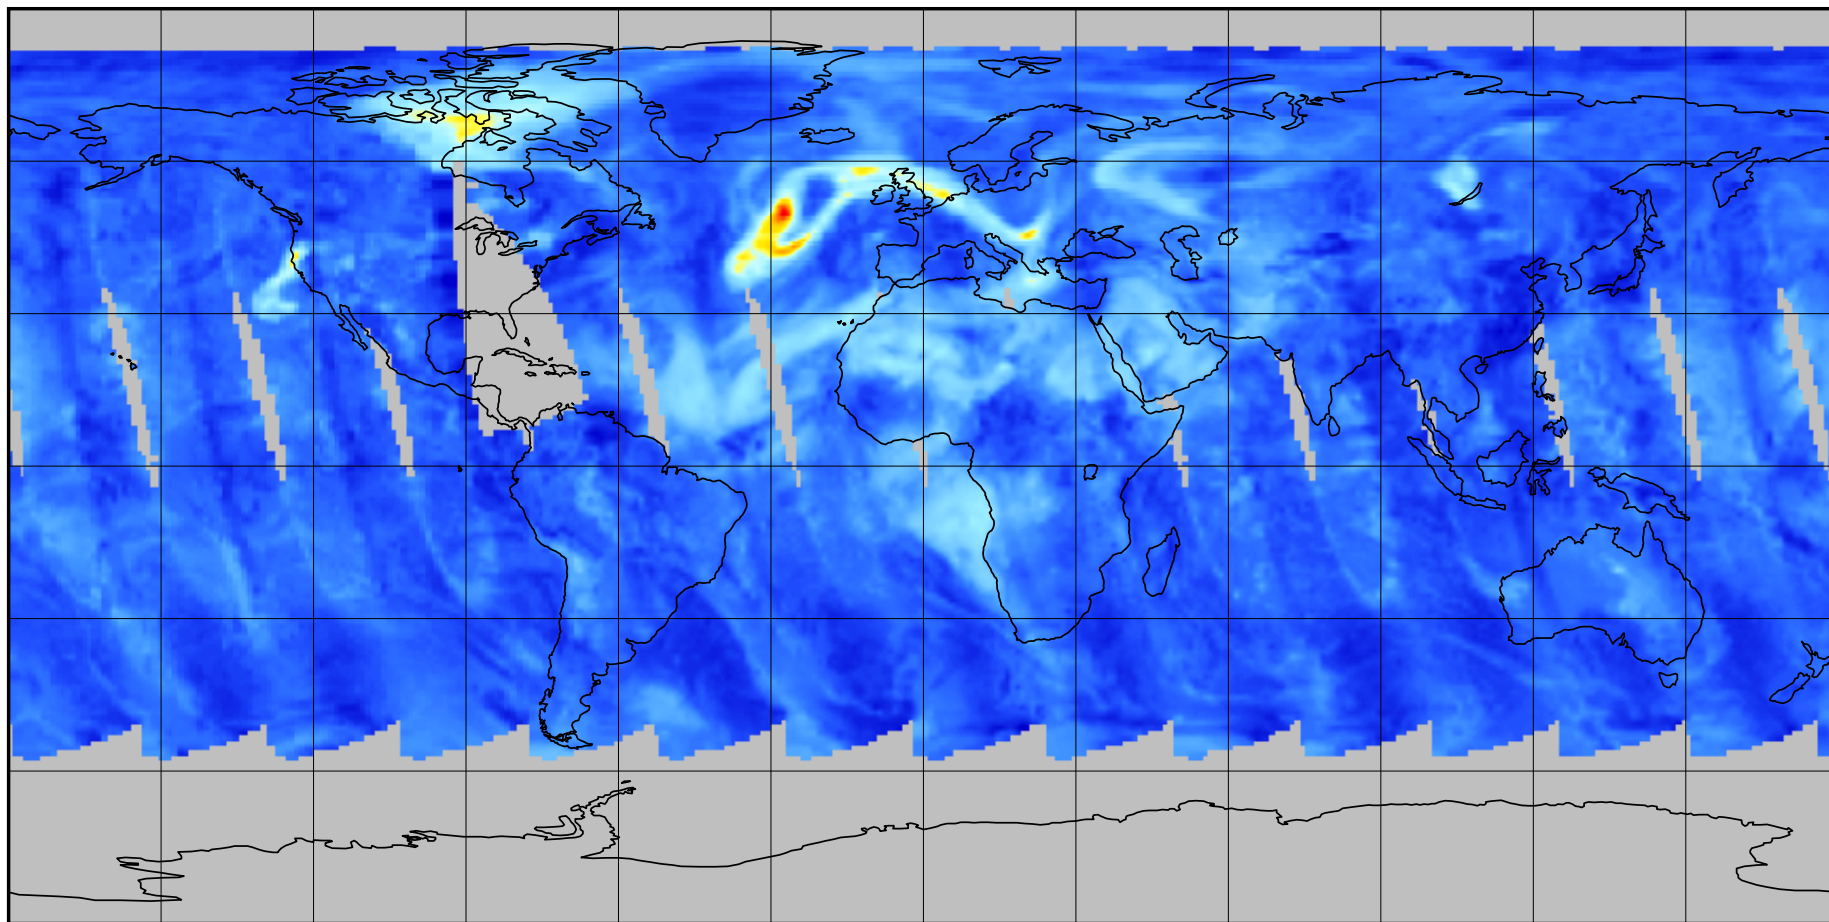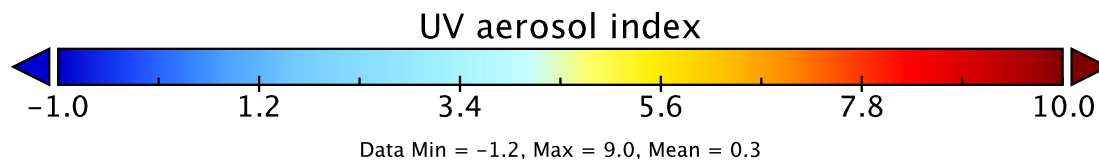



22 August 2017

## UV Aerosol Index

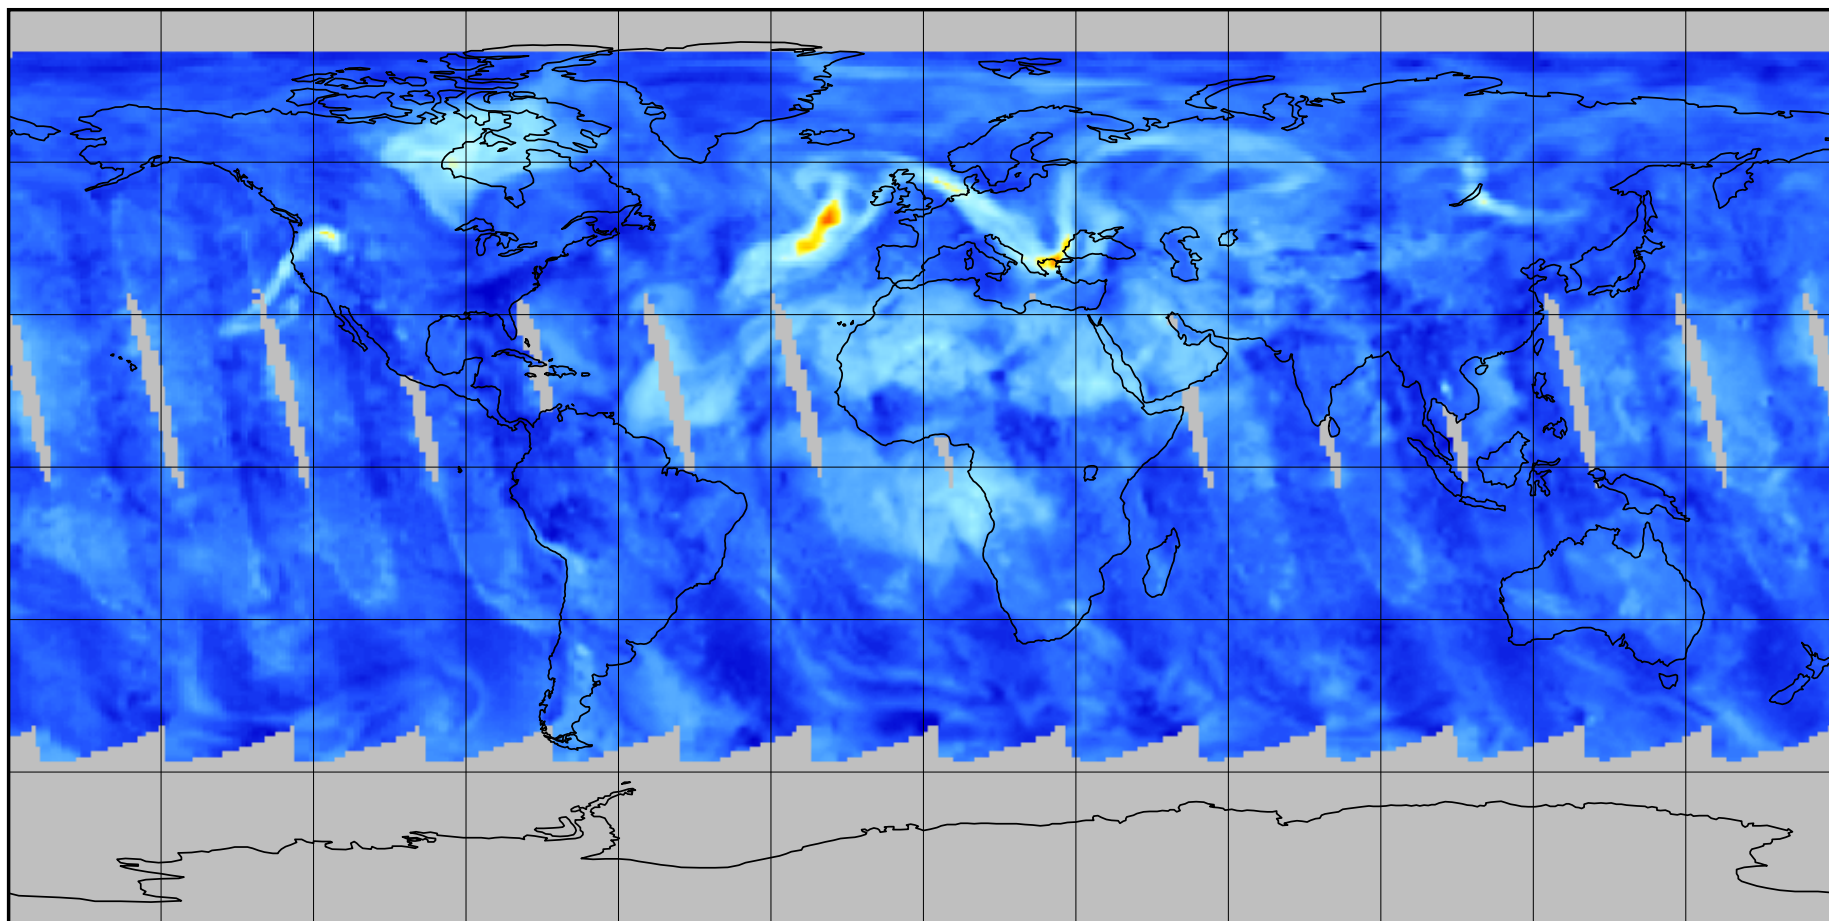

UV aerosol index

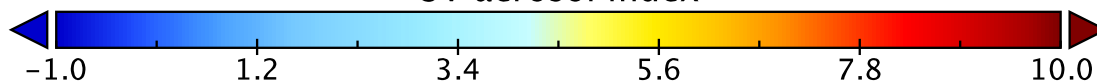

Data Min = -1.2, Max = 7.8, Mean = 0.3

23 August 2017

## UV Aerosol Index

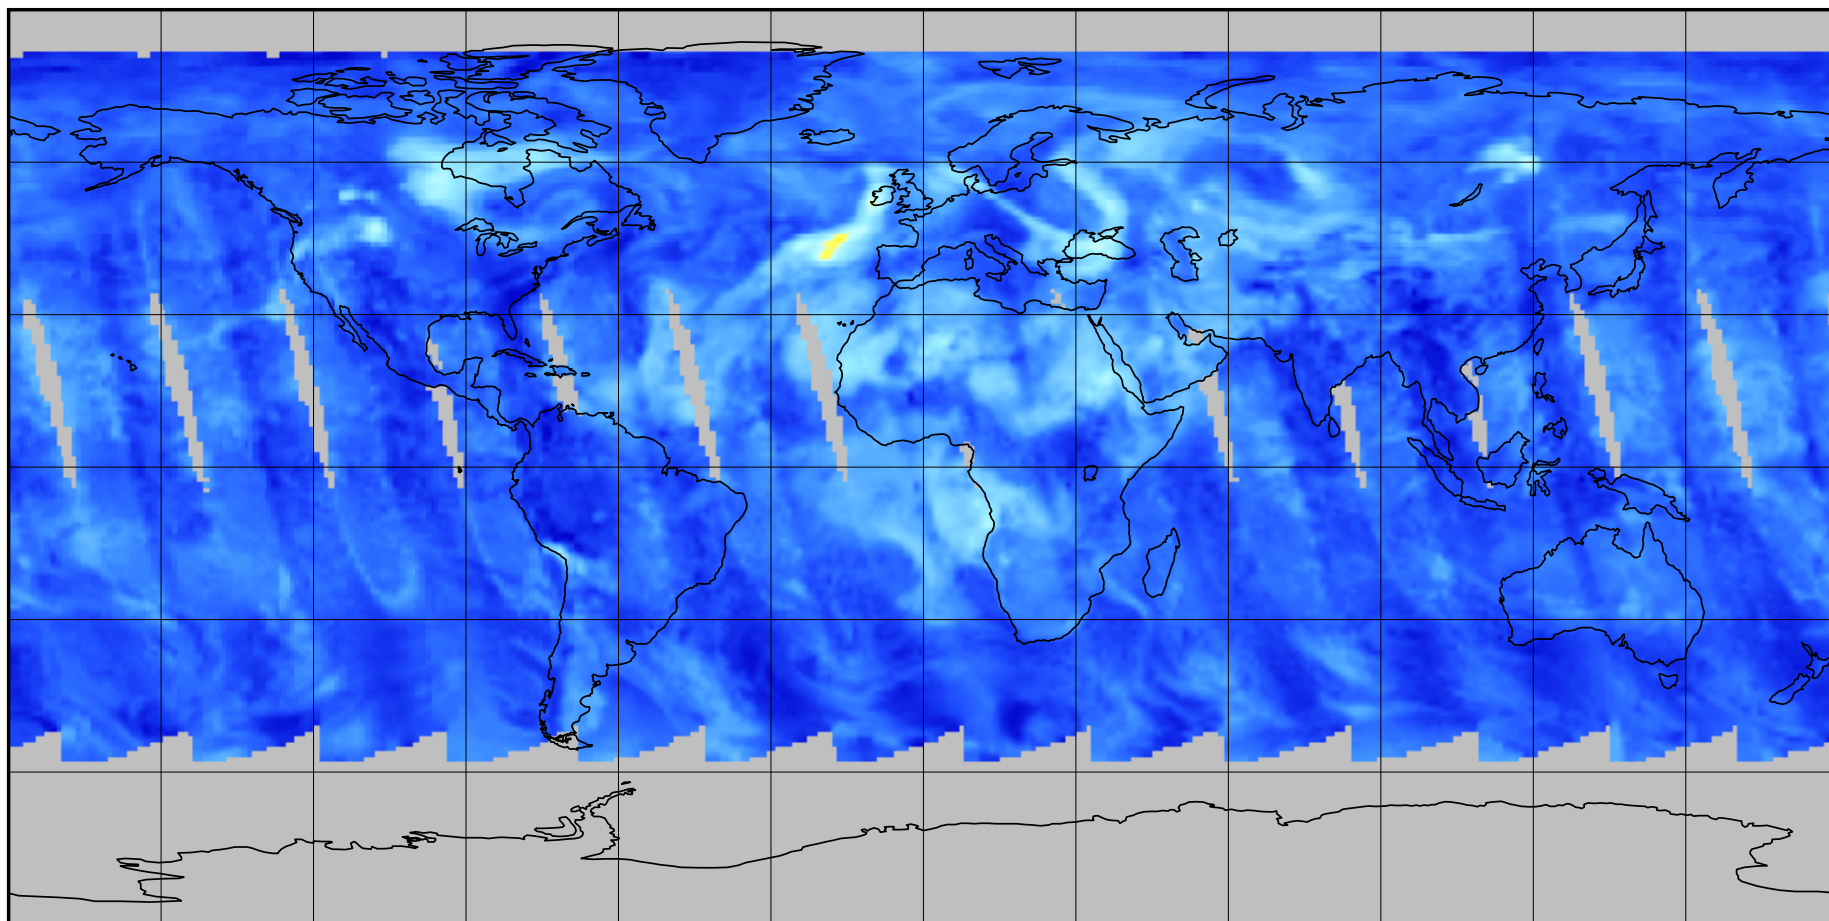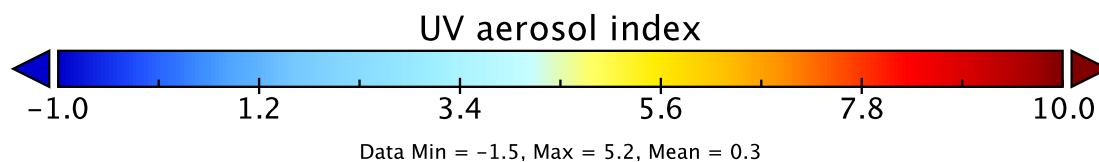

24 August 2017

## UV Aerosol Index

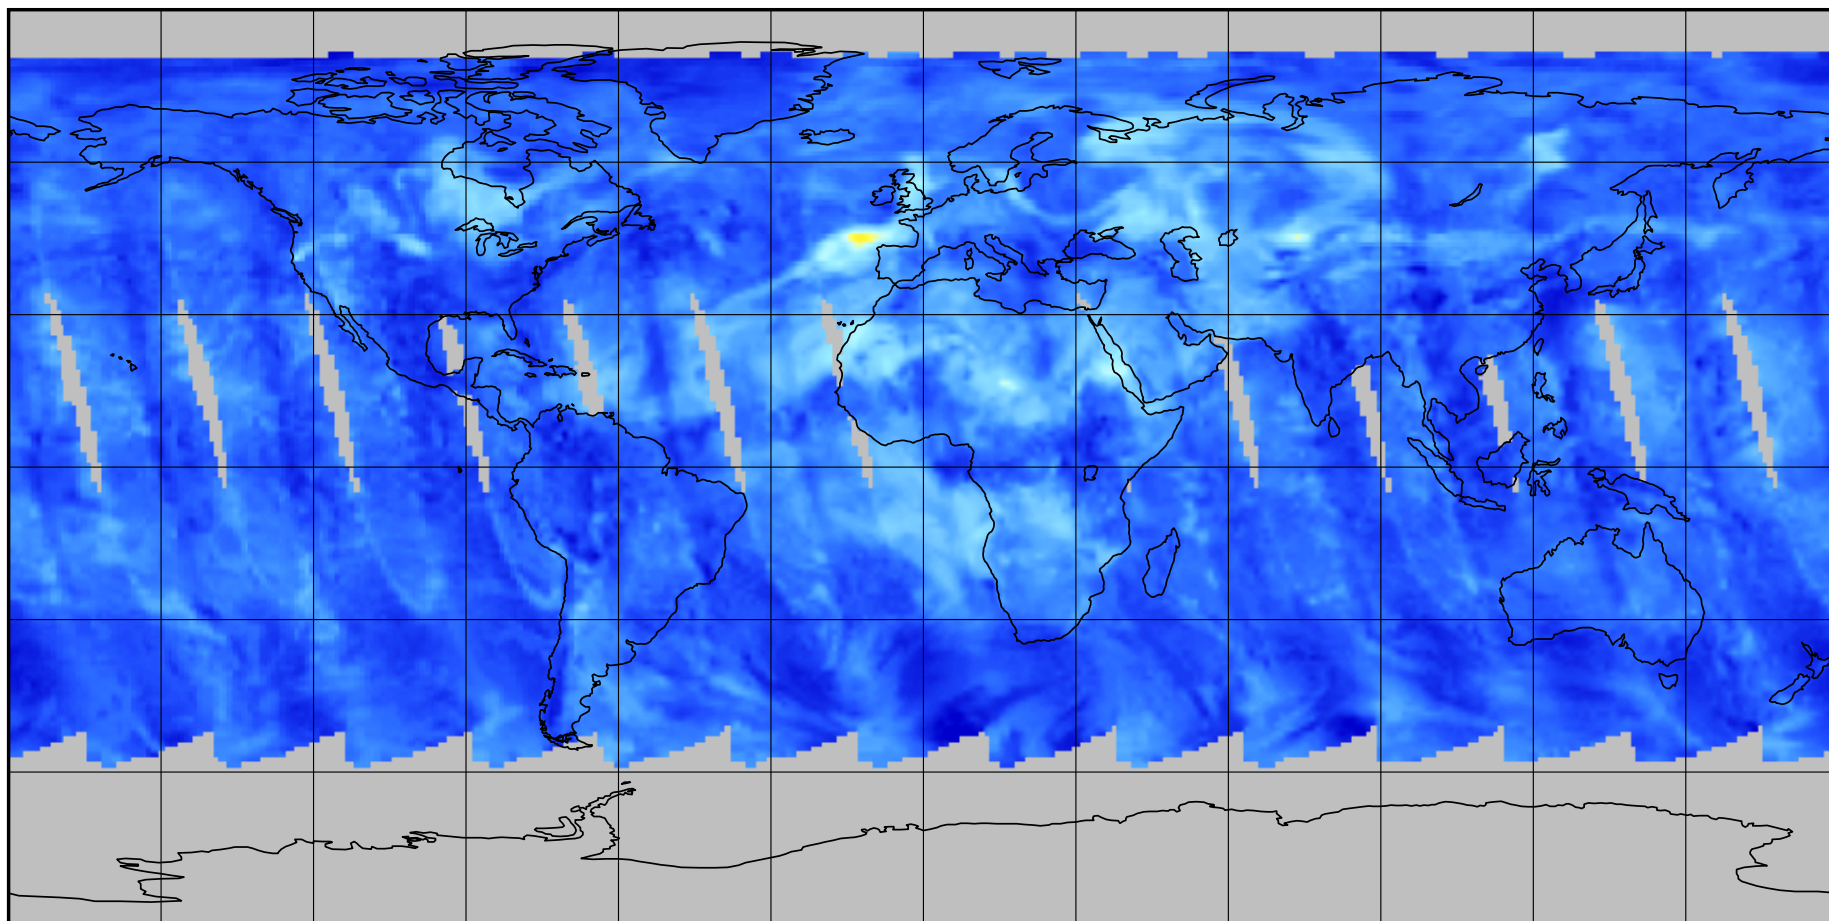

UV aerosol index



Data Min = -1.3, Max = 5.4, Mean = 0.3



25 August 2017

## UV Aerosol Index

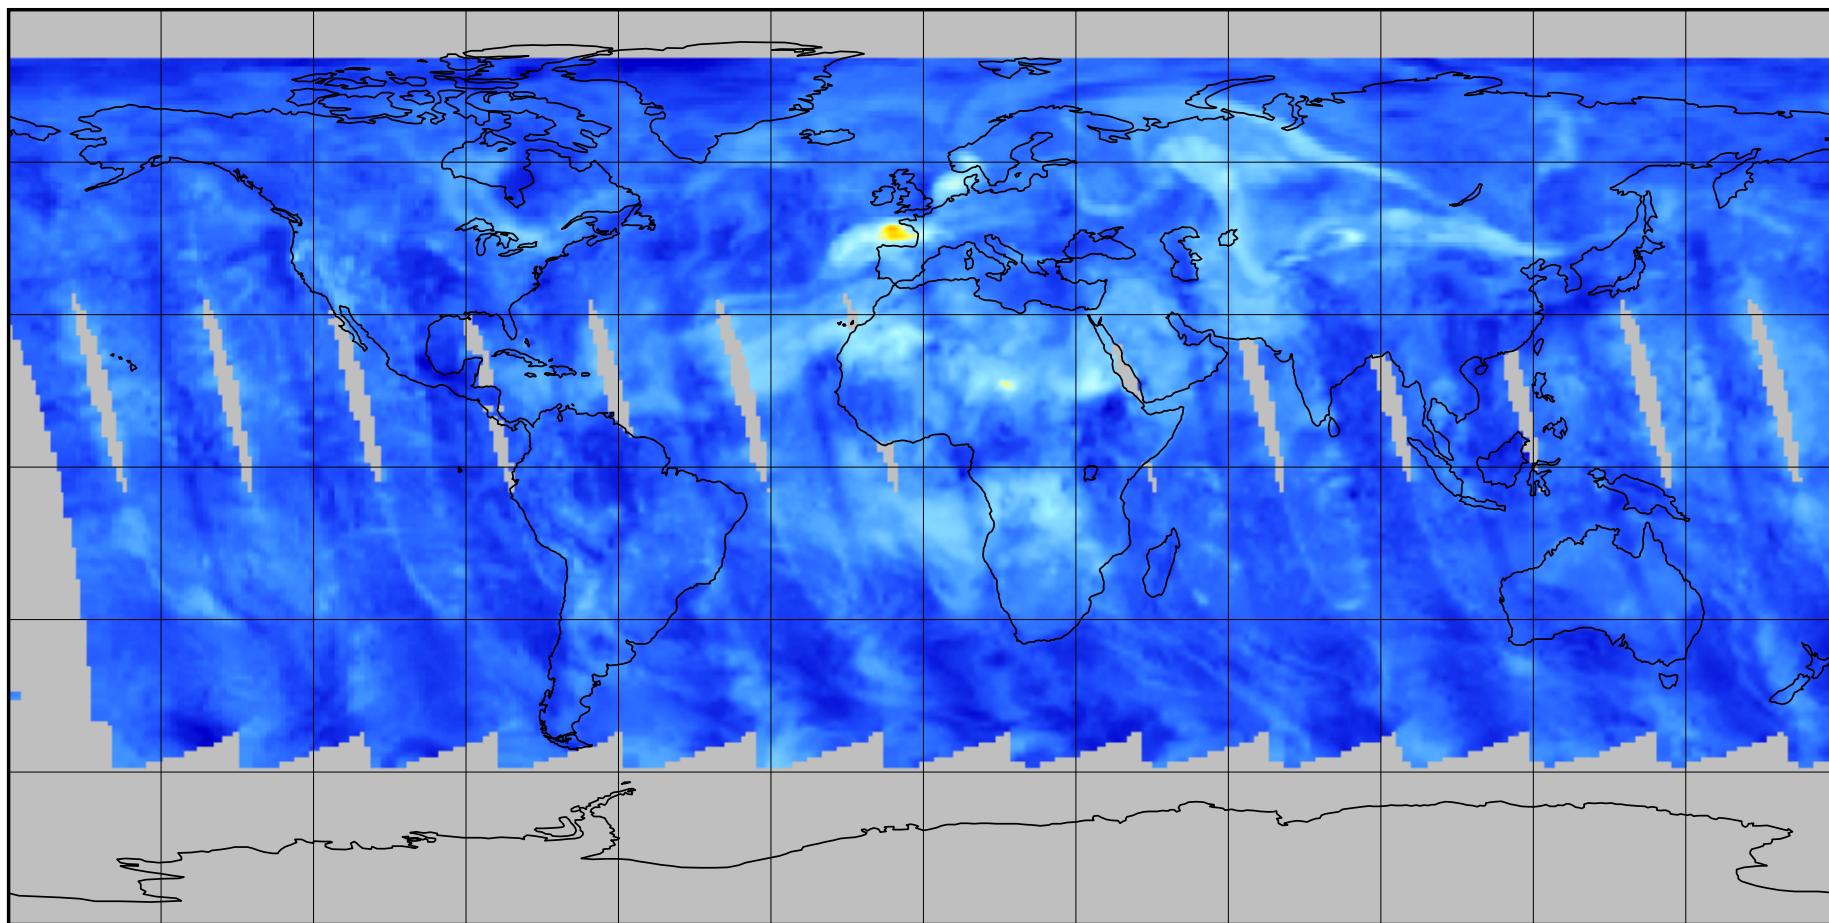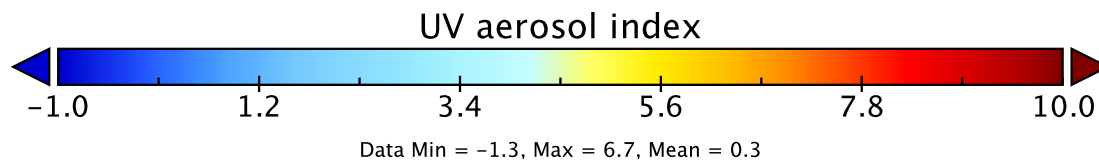

26 August 2017

## UV Aerosol Index

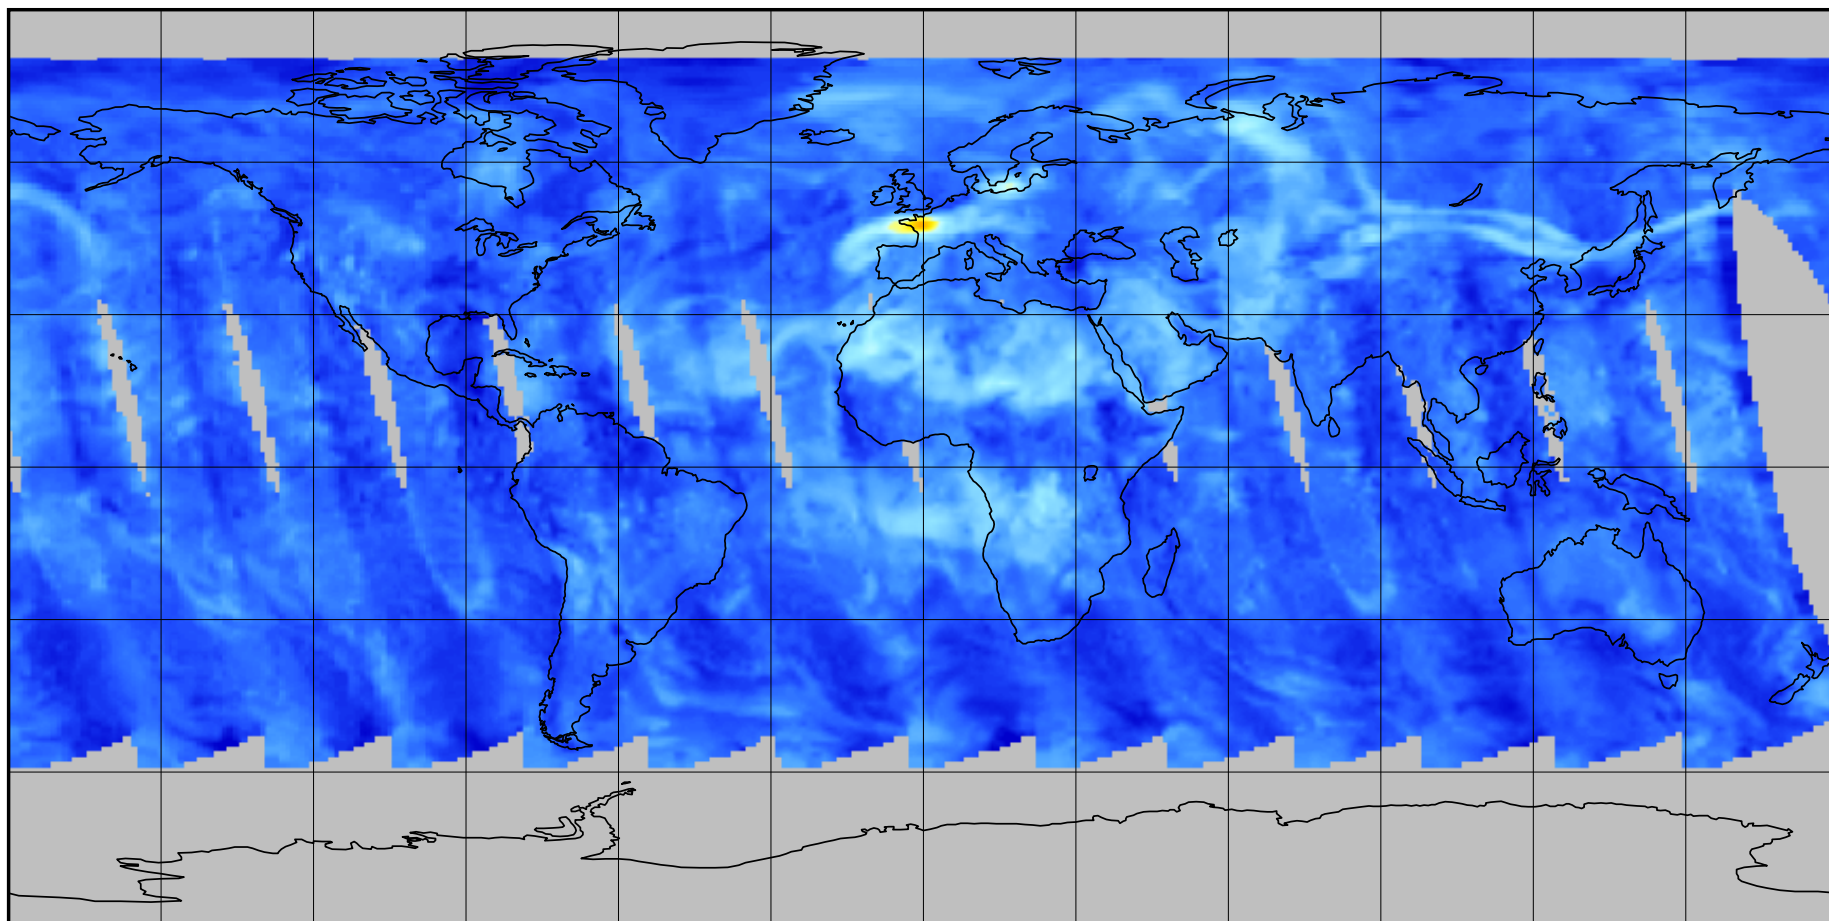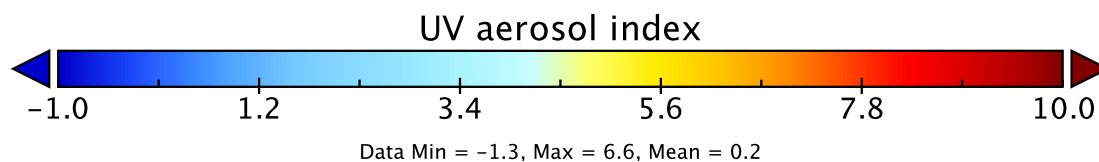

27 August 2017

## UV Aerosol Index

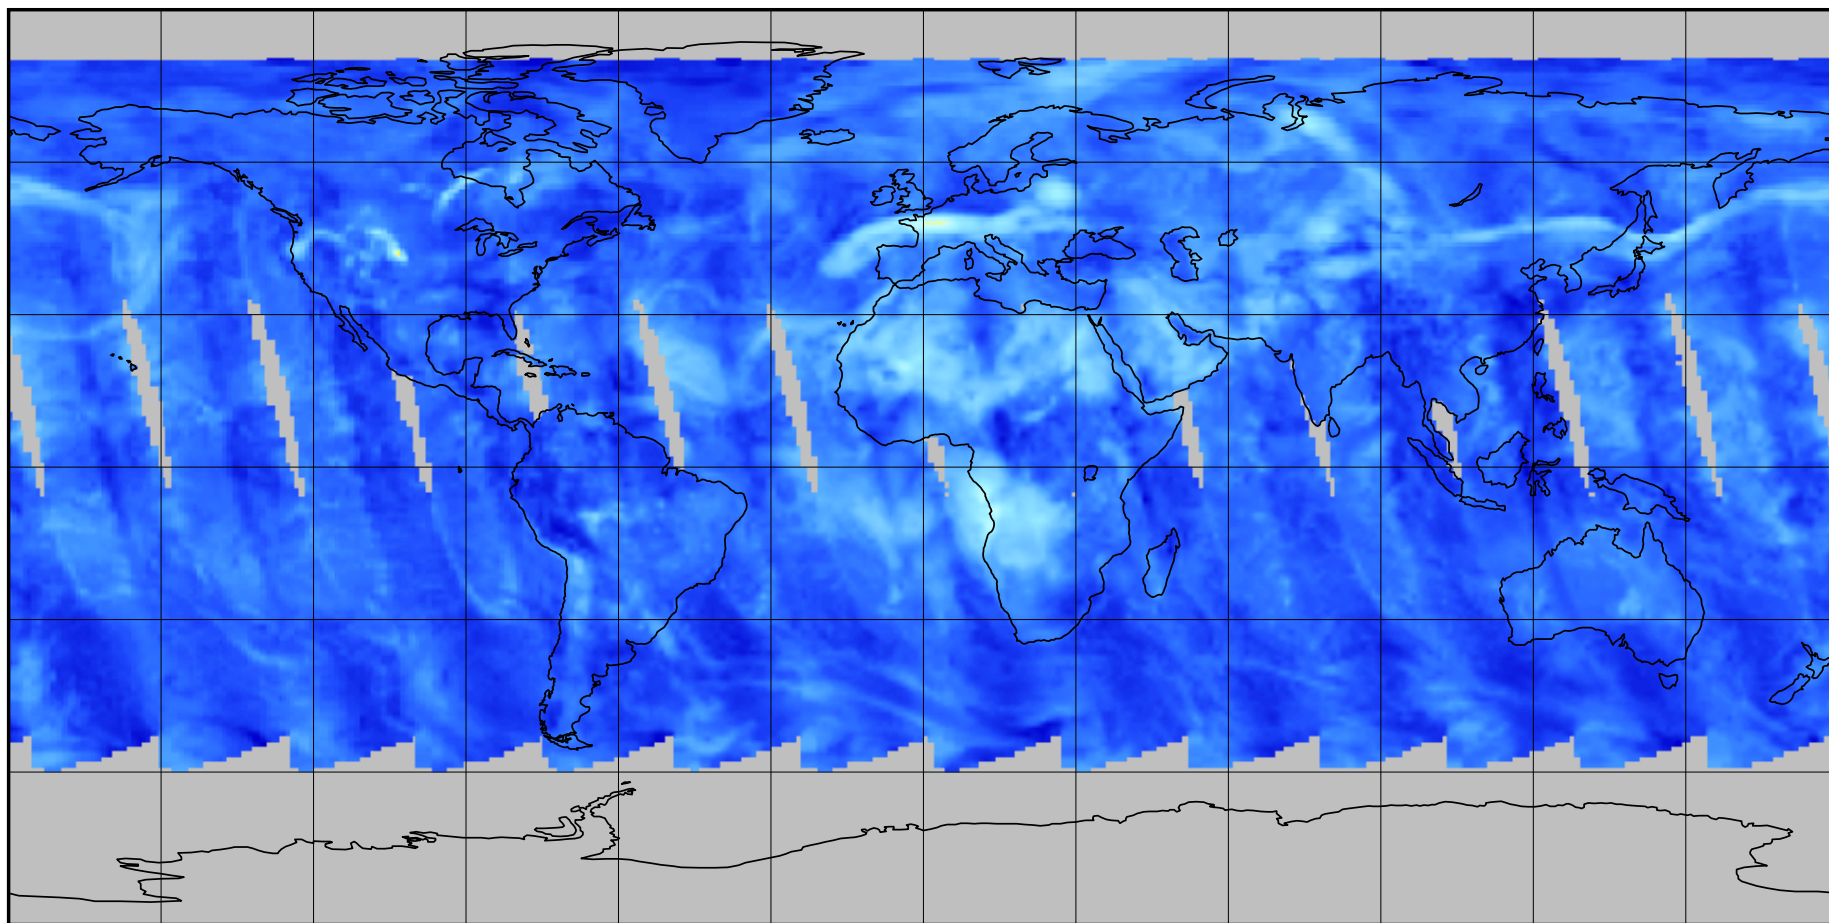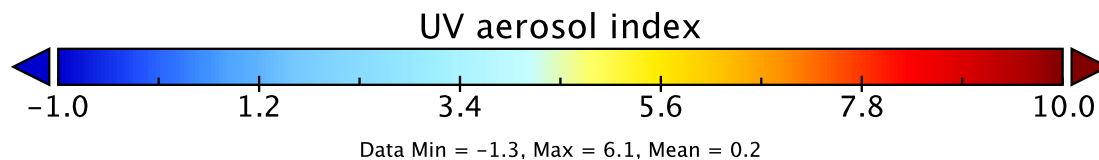



28 August 2017

## UV Aerosol Index

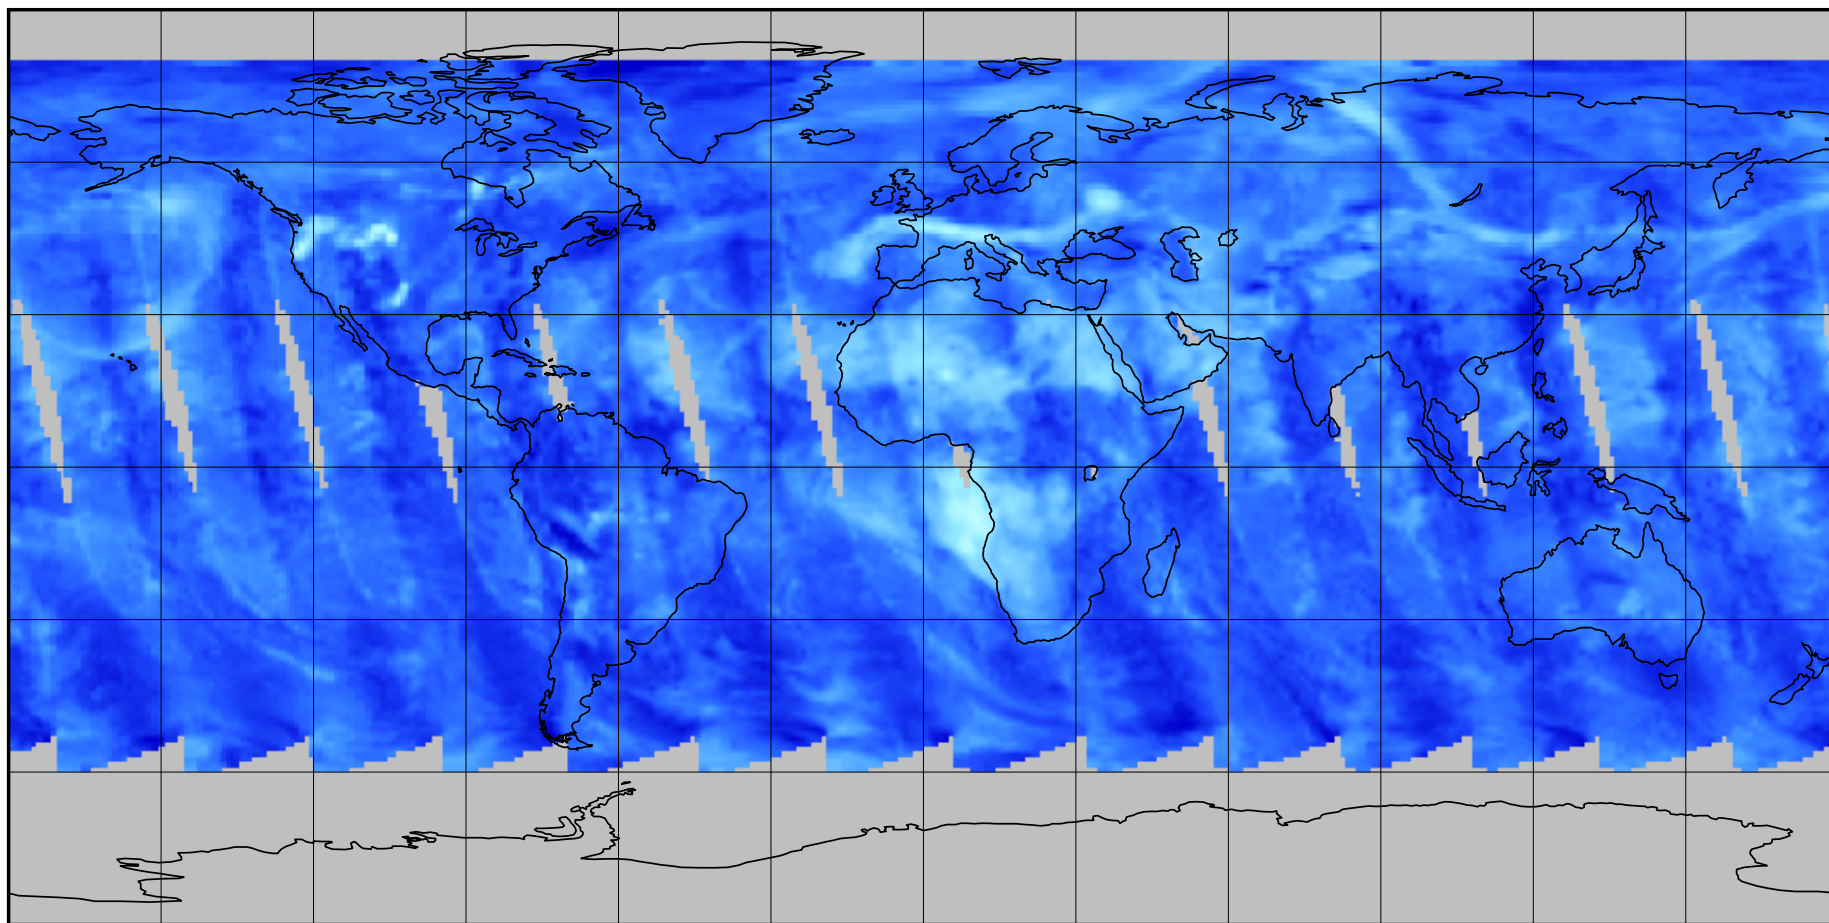

UV aerosol index



Data Min = -1.5, Max = 4.5, Mean = 0.2

29 August 2017

## UV Aerosol Index

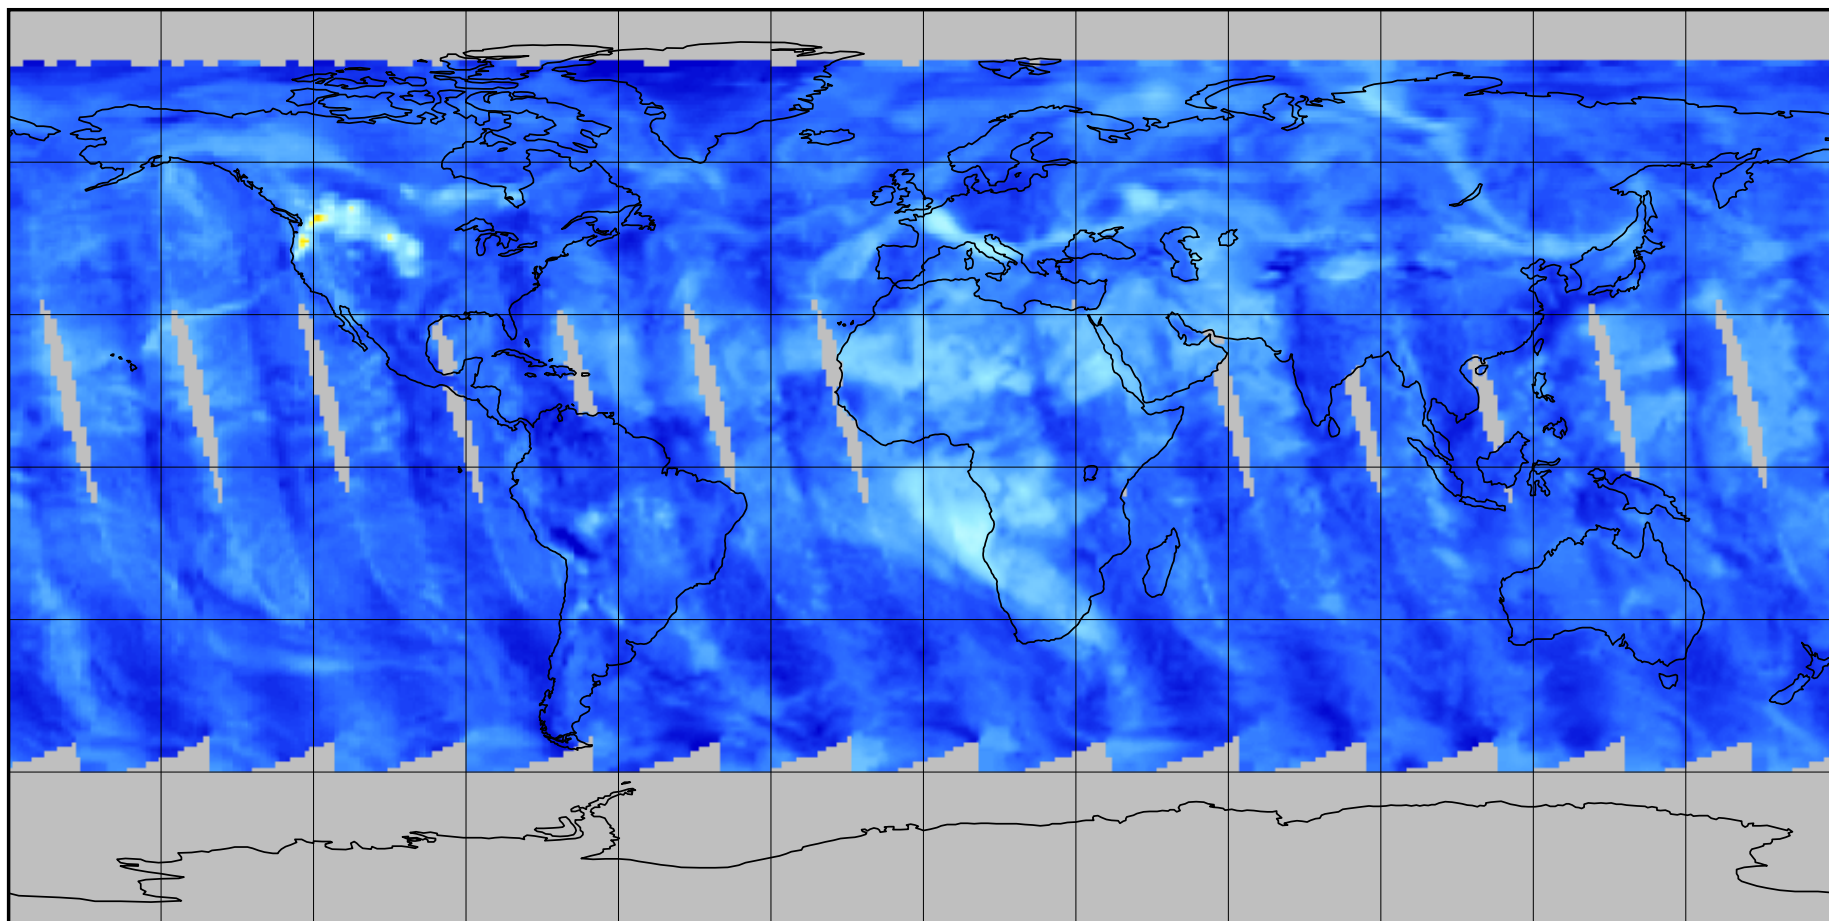

UV aerosol index



Data Min = -1.4, Max = 7.9, Mean = 0.2

30 August 2017

## UV Aerosol Index

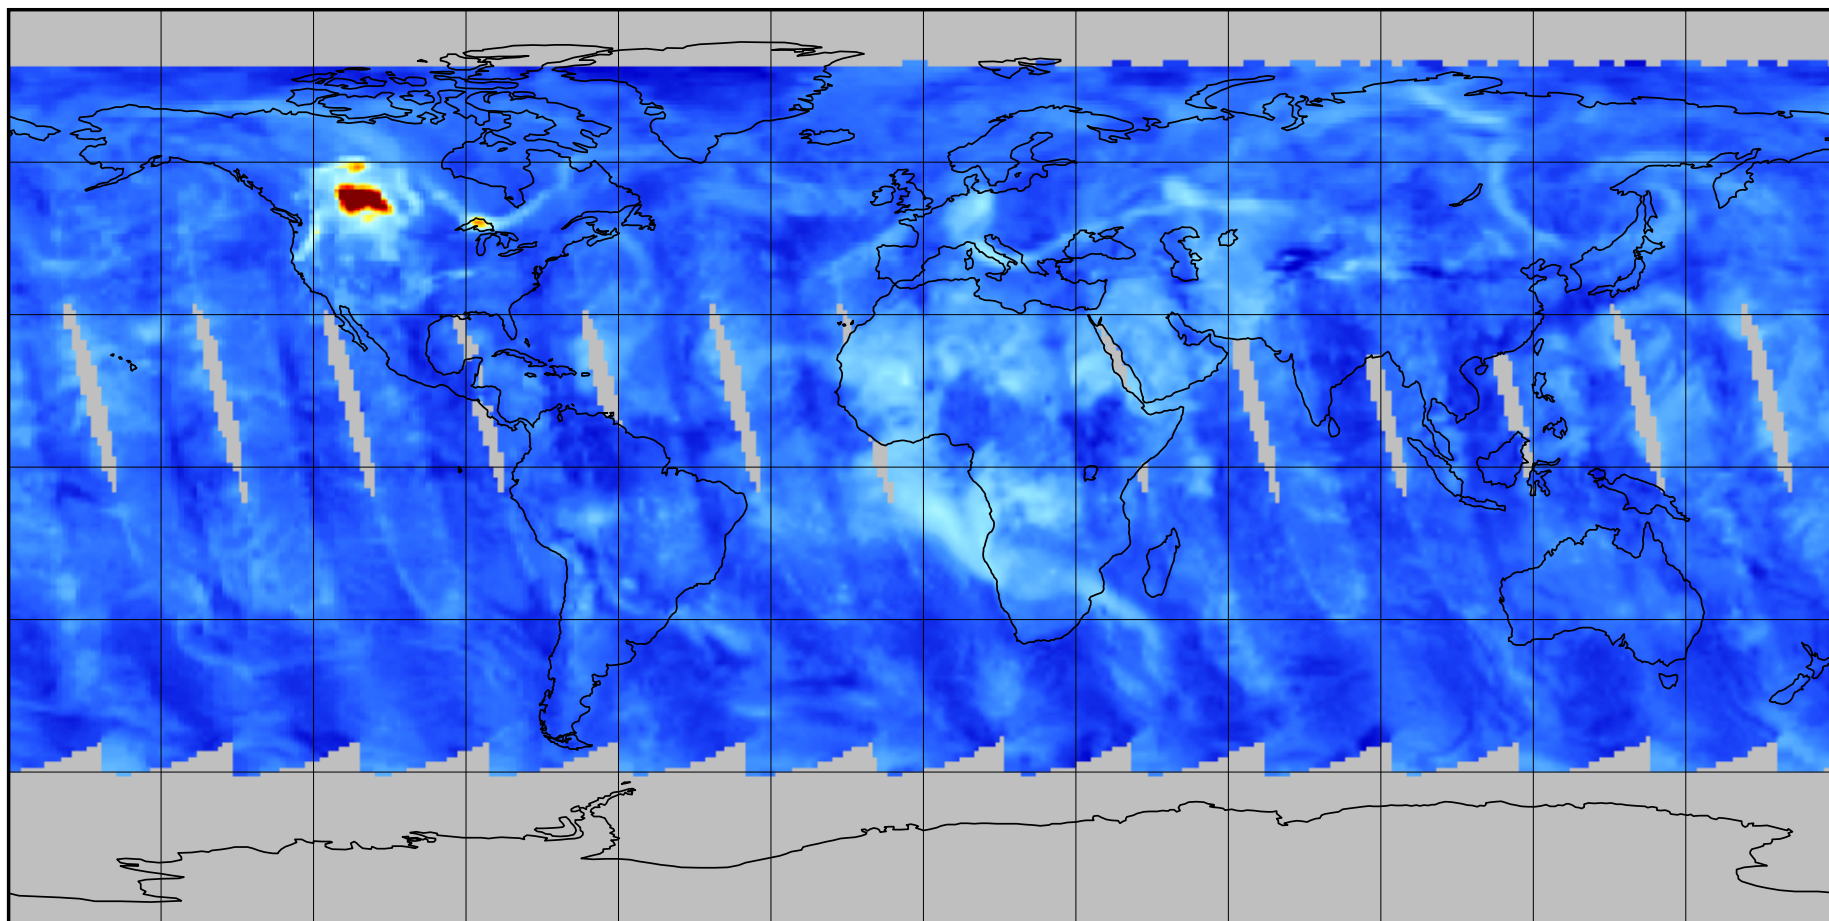

UV aerosol index



Data Min = -1.3, Max = 17.5, Mean = 0.2



31 August 2017

## UV Aerosol Index

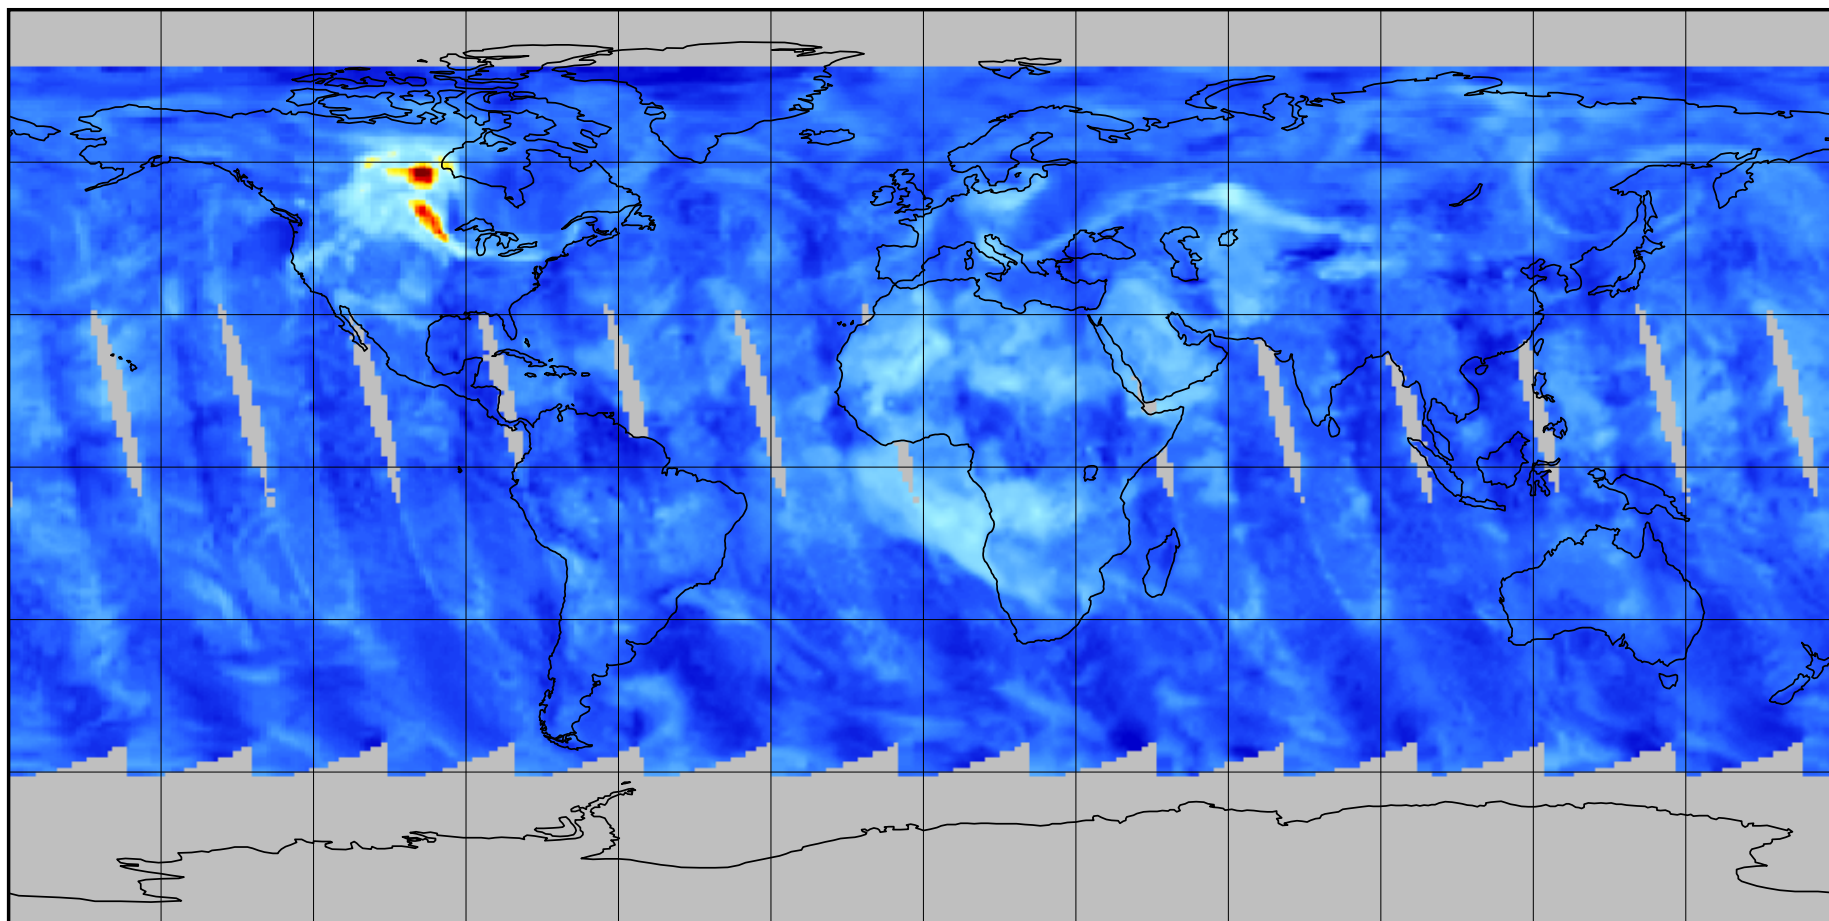

UV aerosol index



Data Min = -1.3, Max = 12.7, Mean = 0.3
