# Supplementary material for: A study of long-range transported smoke aerosols in the Upper Troposphere/Lower Stratosphere
Source: Copernicus journal article supplement (doi:10.5194/acp-2018-655), 2018-07-09
Supplement: Supplementary file [file acp-2018-655-AC1-supplement.zip]

# Long-range transported Canadian smoke plumes in the lower stratosphere observed over northern France

Qiaoyun Hu<sup>1</sup>, Philippe Goloub<sup>1</sup>, Igor Veselovskii<sup>2</sup>, Juan-Antonio Bravo Aranda<sup>3</sup>, Ioana Popovici<sup>1,4</sup>, Thierry Podvin<sup>1</sup>, Martial Haeffelin<sup>3</sup>, Anton Lopatin<sup>5</sup>, Christophe Pietras<sup>3</sup>, Xin Huang<sup>5</sup>, Benjamin Torres<sup>1</sup>, and Cheng Chen<sup>1</sup>

<sup>1</sup>Univ. Lille, CNRS, UMR8518 – LOA – Laboratoire d’Optique Atmosphérique, 59000 Lille, France

<sup>2</sup>Physics Instrumentation Center of GPI, Troitsk, Moscow, 142190, Russia

<sup>3</sup>Institut Pierre Simon Laplace, École Polytechnique, CNRS, Université Paris-Saclay, 91128 Palaiseau, France

<sup>4</sup>CIMEL Electronique, 75011 Paris, France

<sup>5</sup>GRASP-SAS, Remote sensing developments, 59650 Villeneuve d’Ascq, France

**Correspondence:** Qiaoyun Hu (qiaoyun.hu@univ-lille.fr)

**Abstract.** Long-range transported Canadian smoke layers in the stratosphere over northern France were detected by three Lidar systems in August 2017. The peaked optical depth of the stratospheric smoke, derived from our Lidar observations, exceeded 0.20 at 532 nm, which is comparable with the simultaneous tropospheric aerosol optical depth. The measurements of satellite sensors revealed that the observed stratospheric smoke plumes were transported from Canadian wildfires after being lofted by strong pyro-cumulonimbus. Case studies in two observation site Lille (50.612°N, 3.142°E, 60 m a.s.l) and Palaiseau (48.712°N, 2.215°E, 156 m a.s.l) are presented in detail. Smoke particle depolarization ratios are measured at three wavelengths: over 0.20 at 355 nm, 0.18–0.19 at 532 nm and 0.04–0.05 at 1064 nm. The high depolarization ratios and interesting spectral dependence are possibly caused by the irregular-shaped aged smoke particles or/and the mixing with dust particles. An explanation that can fully resolve this question is not yet found. Aerosol inversion based on Lidar  $2\alpha + 3\beta$  data derived smoke effective radius about 0.33  $\mu\text{m}$  for both cases. The retrieved single scattering albedo is in the range of 0.8 to 0.9, indicating that the smoke plumes are very absorbing. The absorption can cause perturbations to the temperature vertical profile, as observed by ground-based radiosonde. The ascent of the smoke plumes when exposed in sunlight is also related to the absorption of smoke particles. A direct radiative forcing calculation is performed using the obtained optical and microphysical properties. The calculation revealed that the smoke plumes in the stratosphere can significantly reduce the radiation arriving at the surface, and the heating rate of the plume is about 3.5 K per day.

## 1 Introduction

Stratospheric aerosols play an important role in the global radiative budget and chemistry-climate coupling (Deshler, 2008; Kremser et al., 2016; Shepherd, 2007). Volcanic eruption is a significant contributor of stratospheric aerosols because the explosive force could be sufficient enough to penetrate the tropopause, which is regarded as a barrier to the convection between the troposphere and stratosphere. Besides volcanic eruption, biomass burning has been reported to be one important constituent of the increasing stratospheric aerosols (Hofmann et al., 2009; Khaykin et al., 2017; Zuev et al., 2017). The pyro-cumulonimbus

clouds generated in intense fire activities have the potential to elevate fire emissions from the planetary boundary layer to the stratosphere (Luderer et al., 2006; Trentmann et al., 2006) and stratospheric smoke plumes have been reported in many previous studies (Fromm et al., 2000; Fromm and Servranckx, 2003; Fromm et al., 2005; Sugimoto et al., 2010)

In the summer of 2017, intense wildfires spread in the west and north of Canada. By mid-August, the burnt area had grown to almost 9000 km<sup>2</sup> in British Columbia, which broke the record set in 1958 (see [the link](#)). The severe wildfires generated very strong pyro-cumulonimbus clouds, which were recorded by the satellite imaginary MODIS (Moderate Resolution Imaging Spectrometer). The GOES-15 (Geostationary Operational Environmental Satellite) detected five pyro-cumulonimbus clouds in British Columbia on 12 August 2017 (see <https://pyrocb.ssec.wisc.edu>). The emitted smoke plumes were observed by several Lidar stations in Europe. Ansmann et al. (2018) and Haarig et al. (2018) observed stratospheric smoke layers originated from Canadian wildfires on 21–23 August 2017 in Leipzig, Germany. The maximum extinction coefficient of the smoke layers reached 0.5 km<sup>-1</sup>, about 20 times higher than the observation after the eruption of Pinatubo volcano in 1991. Khaykin et al. (2018) reported smoke layers with the same origin in the stratosphere over southern France in August 2017 and they found that the stratospheric smoke plumes can travel the whole globe (at middlelatitudes) in about three weeks.

Reoccurring aerosol layers in the troposphere and lower stratosphere were detected by the Lidar systems in northern France during 19 August and 12 September 2017. In this study, we present the stratospheric smoke observations from two French Lidar stations: Lille (50.612°N, 3.142°E, 60 m a.s.l) and Palaiseau (48.712°N, 2.215°E, 156 m a.s.l), and a mobile Lidar system. Satellite measurements from multiple sensors, including UVAI (Ultraviolet aerosol index) from the OMPS NM (Ozone Mapping and Profiler Suite, Nadir Mapper), CO (carbon monoxide) concentration from AIRS (Atmospheric Infrared Sounder), backscatter coefficient and depolarization profiles from CALIPSO (Cloud-Aerosol Lidar and Infrared Pathfinder Satellite Observations) help identify the source and the transport pathway of the smoke layers. We focus on the retrieval of the aerosol optical and microphysical properties from the Lidar measurements. Further, we study the radiative effect of the smoke layer.

## 2 Methodology

### 2.1 Lidar data processing

In this subsection, we present the method for the processing of Lidar measurements and the error estimation is presented in the Appendix. Raman Lidar technique (Ansmann et al., 1992) allows an independent calculation of extinction and backscatter coefficients. When the nitrogen Raman signal is not available, Klett method (Klett, 1985) is used to calculate the extinction and backscatter coefficient, based on an assumption of aerosol Lidar ratio. In this study, the stratospheric aerosol layers are at high altitudes where the signal-to-noise ratio of Raman channels is not sufficient to obtain high quality extinction profile of the stratospheric layer, therefore, we choose Klett method. To reduce the dependence of Klett inversion on the assumption of Lidar ratio, we use a pre-calculated optical depth of the stratospheric aerosol layer as an additional constraint. We test a series of Lidar ratios in the range of 10–120 sr, and apply independent Klett inversions with each assumed Lidar ratio at a step of 0.5 sr. The integral of the extinction coefficient over the stratospheric layer, expressed below, is compared with the pre-calculated

optical depth.

$$\tau^i(\lambda) = \int_{r_{base}}^{r_{top}} \alpha_a(\lambda, r) dr \quad (1)$$

where  $\tau^i$  is the integral of extinction coefficient  $\alpha_a$ , derived from Klett inversion.  $r$  is the distance, the subscripts *top* and *base* represent the top and base of the stratospheric aerosol layer.  $\lambda$  is the Lidar wavelength. This pre-calculated optical depth is derived from the elastic channel at 355 and 532 nm. The method is widely used in cirrus clouds studies (Platt, 1973; Young, 1995). By comparing the lidar signal with the molecular backscattered lidar signal, we found there is only molecular scattering below and above the smoke plumes. So we can calculate the optical depth of the smoke plumes as below:

$$\tau^u(\lambda) = \frac{1}{2} \ln \frac{\bar{P}_{base}(\lambda) r_{base}^2 \beta_m(\lambda, r_{top})}{\bar{P}_{top}(\lambda) r_{top}^2 \beta_m(\lambda, r_{base})} - \int_{r_{base}}^{r_{top}} \alpha_m(\lambda, r) dr \quad (2)$$

where  $\tau^u$  is the optical depth of the stratospheric smoke layers.  $\bar{P}_{top}$  and  $\bar{P}_{base}$  represent the mean Lidar signal at the top and the base of the stratospheric layer.  $\alpha_m$  and  $\beta_m$  are the molecular extinction and backscatter coefficient. We calculate the lidar signal mean within a window of 0.5 km at the top and the base of the aerosol layer, to get  $\bar{P}(r_{top}, \lambda)$  and  $\bar{P}(r_{base}, \lambda)$ . We use this method to estimate the optical depth of the stratospheric layer for LILAS and IPRAL measurements. The Lidar ratio leading to the best agreement of  $\tau^i$  and  $\tau^u$  is accepted as the retrieved Lidar ratio of the stratospheric aerosol layer. We apply Klett inversion only to the stratospheric aerosol layer, therefore, the impact of tropospheric aerosols is excluded. Compared to Raman method, the extinction and backscatter coefficients calculated from Klett inversion are not obtained from independent calculations. This is the reason that the extinction and backscatter profiles are similar in the shape.

The particle linear depolarization ratio,  $\delta_p$ , is written as:

$$\delta_p = \frac{R\delta_v(\delta_m + 1) - \delta_m(\delta_v + 1)}{R(\delta_m + 1) - (\delta_v + 1)} \quad (3)$$

where  $R$  is the backscatter ratio,  $\delta_v$  is the volume linear depolarization ratio and  $\delta_m$  is the molecular depolarization ratio.  $R$  is defined as the ratio of the total backscatter coefficient to the molecular backscatter coefficient.  $\delta_v$  is the ratio of the perpendicularly scattered signal to the parallel scattered signal, taking into account a calibration coefficient. The depolarization calibration is designed to calibrate the electro-optical ratio between the perpendicular and parallel channel and is performed following the procedure proposed by Freudenthaler et al. (2009). The particle linear depolarization ratio is a parameter related to the shape of aerosol particles, and it is usually used in the Lidar community for aerosol typing. The particle linear depolarization ratio of spherical particles is zero. For irregular-shaped particles, for example ice particles in cirrus clouds, the measurement particle linear depolarization is about 0.40 (Sassen et al., 1985; Veselovskii et al., 2017).

## 2.2 Aerosol inversion and radiative forcing estimation

The  $3\beta + 2\alpha$  from Lidar observations can be inverted to obtain particle microphysical parameters. The regularization algorithm is used to retrieve size distribution, wavelength-independent complex refractive indices, particle number, surface and

volume concentrations (Müller et al., 1999; Veselovskii et al., 2002). We apply the GRASP (Generalized Retrieval of Aerosol and Surface Properties) to calculate the DRF (Direct Radiative Forcing) effect of the stratospheric aerosol layer. GRASP is the first unified algorithm developed for characterizing atmospheric properties gathered from a variety of remote sensing observations. Depending on the input data, GRASP can retrieve columnar, vertical aerosol properties and surface reflectance (Dubovik et al., 2014). As a branch of GRASP algorithm, GARRLiC (Generalized Aerosol Retrieval from Radiometer and Lidar Combined data, called GARRLiC/GRASP hereafter) algorithm was developed for the inversion of coincident single or multi-wavelength Lidar and sun photometer measurements (Lopatín et al., 2013; Bovchaliuk et al., 2016). The two main modules of GARRLiC/GRASP are the forward model and numerical inversion module. The forward module simulates the atmospheric radiation by using radiative transfer and by accounting for the interaction between light and trace gases, aerosols and underlying surfaces. The columnar aerosol scattering properties in the atmosphere are represented by 1 or 2 aerosol components, whose optical properties are described using a mixture of spheres and spheroids. The vertically resolved optical properties, such as the extinction and backscatter coefficients measured by Lidar, are described by varying the aerosol vertical concentration. The numerical inversion module follows the multi-term least squares method strategy and derives several groups of unknown parameters that fit the observations.

In this study, we apply the forward model of GARRLiC/GRASP, which includes a radiative transfer model, to estimate the forcing effect of the observed stratospheric plume in contrast to a standard Rayleigh atmosphere. The input parameters for DRF are the retrieved aerosol microphysical properties from regularization algorithm, including the size distribution, the complex refractive indices as well as the assumed sphere fraction; the aerosol vertical distribution of the stratospheric plume and surface BRDF (Bidirectional Reflectance Distribution Function) parameters. The radiative transfer equation in GARRLiC/GRASP is solved using this parallel plane approximation. The atmosphere is divided into a series of parallel planes and the optical properties of each parallel plane can be represented by the input parameters. The radiative transfer model is based on the study of Lenoble et al. (2007). The forward model of GARRLiC/GRASP can produce downward and upward broadband flux, covering the 0.2–4.0  $\mu\text{m}$  spectrum, at vertical levels specified by the users. Hence, we can calculate the DRF and the heating rate specific to smoke plume.

## 3 Ground-based and satellite observations

### 3.1 Simultaneous Lidar and sun photometer observations

LILAS (Lille Lidar Atmospheric Study) is a multi-wavelength Raman Lidar (Bovchaliuk et al., 2016; Veselovskii et al., 2016) operated at LOA (Laboratoire d’Optique Atmosphérique, Lille, France). LILAS system is transportable and has three elastic channels (355, 532 and 1064 nm), with the capability of measuring the depolarization ratios at these wavelengths. Further it has three Raman channels at 387, 408 and 530 nm. IPRAL system (IPSL Hi-Performance multi-wavelength Raman Lidar for Cloud Aerosol Water Vapor Research, Bravo-Aranda et al. (2016); Haeffelin et al. (2005)) is a multi-wavelength Raman Lidar operated at SIRTa (Site Instrumental de Recherche par Télédétection Atmosphérique, Palaiseau, France). The distance between the two systems is around 300 km. Lidar IPRAL has the same elastic channels, but the three Raman channels are

387, 408 and 607 nm. In IPRAL system, the depolarization ratio is only measured at 355 nm. The two Lidar systems were operated independently and both observed reoccurring smoke layers in the lower stratosphere during the period of 19 August to 12 September 2017. In addition, sun photometer measurements are available at Lille and Palaiseau, which are both affiliated stations of AERONET (Aerosol Robotic Network). LILAS and IPRAL Lidar systems are affiliated to EARLINET (European  
5 Aerosol Research Lidar Network) (Bösenberg et al., 2003; Böckmann et al., 2004; Matthais et al., 2004; Papayannis et al., 2008; Pappalardo et al., 2014). Both systems perform regular measurements and follow the standard EARLINET data quality check and calibration procedures (Freudenthaler et al., 2018).

On 29 August, three Lidar systems in northern France simultaneously observed an stratospheric aerosol layer. The three Lidar systems are LILAS, IPRAL and a single wavelength (532 nm) CIMEL micro-pulse Lidar, which is set up in a light mobile  
10 system, MAMS (Mobile Aerosol Monitoring System, Popovici et al. (2018)) to explore aerosol spatial variability. MAMS was traveling between Palaiseau and Lille on 28 and 29 August. MAMS is equipped with a mobile sun photometer, PLASMA (Photomètre Léger Aéroporté pour la Surveillance des Masses d’Air, Karol et al. (2013)), capable to measure columnar aerosol optical depth (AOD) along the route. The configuration of the three Lidar systems is summarized in Table 1.

Figure 1 shows the normalized Lidar range-corrected signals and columnar AOD at 532 nm derived from sun photometer  
15 measurements on 29 August 2017. The aerosol layers in the lower stratosphere, stretching from 16 to 20 km, were detected by the three Lidars. The IPRAL Lidar system in Palaiseau detected the aerosol layer in the range of 16–20 km on 29 August. The columnar AOD showed no significant variations, staying between 0.30 and 0.40, from 1000 UTC to 1600 UTC and started decreasing from 1700 UTC. Along the route Palaiseau-Lille, MAMS Lidar observed a layer between 16 and 20 km consisting of two well-separated layers. The columnar AOD was very stable, around 0.40, all along the route from Palaiseau to Lille.  
20 Lidar LILAS in Lille observed a shallow layer between 18–20 km at about 0800 UTC on 29 August. The thickness of the layer increased to 4 km until 1600 UTC. The columnar AOD increased from 0.20 to 0.40 from 0800 UTC to 1400 UTC. The lidar quicklook indicates that the aerosol content in the lower troposphere does not show significant variations during 0800 UTC and 1200 UTC, the increased optical depth, 0.2, comes mainly from the contribution of the stratospheric aerosol layer.

Figure 2 shows the Lidar range corrected signal at 1064 nm on 24–25 August 2017. The plume between 17 and 18.5 km is the  
25 smoke layer. Due to cirrus clouds and low clouds in the troposphere, the lidar signals in the plume are interrupted. In nighttime, the plume base is stable at about 17 km. Just starting from the sunrise time at 04:51 UTC, a gradual and obvious ascent is observed. In 3–4 hours, the plume base ascended about 0.6 km. Between 10:00–16:00 UTC, the plume base stayed stable. The ascent of smoke plume was also presented in Ansmann et al. (2018) and Khaykin et al. (2018). Khaykin et al. (2018) mentioned that the plume can ascend 2–3 km per day during the first few days after being injected into the troposphere. Based  
30 on the observation in Figure 2, we derived the ascent rate of approximately 2.1–2.8 km per day, considering that the sunshine duration is 13 hours (according to the latitude of Lille site) and that the vertical speed of the plume is constant. Ansmann et al. (2018) explained that the ascent of the plume is related to the absorption of soot-containing aerosols and the wind velocity in the stratosphere. Figure 2 shows that the plume does not continuously ascend in the daytime. One possible explanation we infer here is the wind velocity. As presented by Ansmann et al. (2018), the wind speed decreases with altitude at above 16 km,

so it could potentially generate a downward force which may cancel out the ascending trend induced by self-heating effect and the plume's gravity.

### 3.2 Radiosonde measurements

Fromm et al. (2005, 2008) showed an increase of temperature in the stratospheric smoke layers. This "warming" effect has been observed in aged absorbing aerosols. We take the radiosonde measurements from two stations closest to the Lidar sites: Trappes (48.77°N, 1.99°E, France) and Beauvechain (50.78°N, 4.76°E, Belgium). Trappes is about 20 km to Palaiseau and Beauvechain is 120 km to Lille. Considering the large spatial distribution of the stratospheric aerosols, it is obvious that the radiosonde passed through this stratospheric layer. Figure 3 shows the temperature at 0000, 1200 UTC, 29 August for Trappes and 2100 UTC, 29 August for Beauvechain. To compare, we plot the temperature profile of Trappes at 1200 UTC, 21 August, when no stratospheric aerosol layer presented. The temperature profiles show clearly an enhancement between 16 and 20 km, which coincides with the region where the stratospheric plumes appear. The spatial-temporal occurrence of this temperature enhancement and the stratosphere plume in two independent stations indicate that they are directly correlated.

### 3.3 MODIS measurements

MODIS is a key instrument onboard the Terra and Aqua satellites. Terra MODIS and Aqua MODIS are viewing the entire Earth's surface every 1 to 2 days. Several episodes of Canadian wildfires have been observed by MODIS since early July 2017. On 12 August, MODIS observed a thick, grey plume arising from the British Columbia in the west of Canada (not shown but available on the webpage of [WorldView](#)). Figure 4 shows the Earth's true color image overlaid with the fires and thermal anomalies on 15 August 2017 when the plumes have spread over a large area. The region marked with the green dashed line is a huge visible smoke plume and in its southwest, MODIS detected a belt of fire spots. Additionally, during the week of 13–19 August, MODIS (see [WorldView](#)) observed a widespread cloud coverage over Canada and showed that clouds layers were overshadowed by the smoke plumes, meaning that the plumes were lofted above the cloud layers, as shown in Figure 4.

### 3.4 OMPS NM UVAI maps

UVAI is a widely used parameter in characterizing UV-absorbing aerosols, such as desert dust, carbonaceous aerosols coming from anthropogenic biomass burning, wildfires and volcanic ash. The UVAI is determined using the 340 and 380 nm wavelength channels and is defined as:

$$UVAI = -100 \times \left\{ \log_{10} \left[ \frac{I_{340}}{I_{380}} \right]_{meas} - \log_{10} \left[ \frac{I_{340}}{I_{380}} \right]_{calc} \right\} \quad (4)$$

where  $I_{340}$  and  $I_{380}$  are the backscattered radiance at 340 and 380 nm channel. The subscript *meas* represents the measurements and the *calc* represents the calculation using a radiative transfer model for pure Rayleigh atmosphere. The UVAI is defined so that positive values correspond to UV-absorbing aerosols and negative values correspond to non-absorbing aerosols (Hsu et al., 1999). The OMPS NM onboard the Suomi NPP (National Polar-orbiting Partnership) is designed to measure the total column ozone using backscattered UV radiation between 300–380 nm. A 110° field-of-view (FOV) telescope enables

full daily global coverage (McPeters et al., 2000; Seftor et al., 2014). Figure 5 shows the evolution of UVAI from OMPS NM (Jaross, 2017) every two days during 11 and 29 August 2017. The evolution of the UVAI during this event has also been shown in the study of Khaykin et al. (2018). A plume with relatively high UVAI first occurred over British Columbia on 11 August, and the intensity of the plume was moderate. An obvious increase of UVAI from 11 August to 13 August is observed over the north-west of Canada. It is an indication that the events on 12 August is responsible for the increase of UVAI. From 13 to 17 August, the plume spread in the northwest-southeast direction and the UVAI in the centre of the plume reached 10. On 19 August, the plume centre reached the Labrador Sea and the front of the plume reached Europe. From 21 to 29 August, the UVAI in the map is much lower than the previous week. During this period, we can still distinguish a plume propagating eastward from the Atlantic to Europe, with the UVAI damping during the transport. Figure 5(e)–(f) show that Europe was overshadowed by the high-UVAI plume during 19 and 29 August.

### 3.5 AIRS CO maps

AIRS is a continuously operating cross-track scanning sounder onboard NASA's Aqua satellite launched in May 2002. AIRS covers the 3.7 to 16  $\mu\text{m}$  spectral range with 2378 channels and a 13.5 km nadir FOV (Susskind et al., 2014; Kahn et al., 2014). The daily coverage of AIRS is about 70% of the globe. AIRS is designed to measure the water vapor and temperature profiles. It includes the spectral features of the key carbon trace gases,  $\text{CO}_2$ ,  $\text{CH}_4$  and CO (Haskins and Kaplan, 1992). The current CO product from AIRS is very mature because the spectral signature is strong and the interference of water vapour is relatively low (McMillan et al., 2005). The CO, as a product of the burning process, can be taken as a tracer of biomass burning aerosols (Andreae et al., 1988) due to its relatively long lifetime of 1/2 to 3 months. CO can also be originated from anthropogenic sources, for example engines of vehicles (Vallero, 2014). In August 2017, the wildfire activities were so intense that the CO plumes raise from the fire region were much more intense than the background. This strong contrast makes CO a good tracer for the transport of the smoke plumes.

Figure 6 shows the evolution of the total column CO concentration (Texeira, 2013) every two days during the period of 11 August to 29 August 2017. The front of the CO plume has appeared over the west and north of Europe since 19 August. We find that the spatial distribution and temporal evolution of CO are strongly co-related with the UVAI. This correlation is much evident before 21 August. After 21 August, the correlation became weaker, for the UVAI in North America was decreasing fast while the CO concentration remained almost unchanged or decreased much slower, possibly due to the longer lifetime of CO. Combining the MODIS image, UVAI and CO distribution and evolution, as well as other relevant information, we conclude the aerosol plumes observed in Europe were smoke transported from Canada.

### 3.6 CALIPSO measurements

CALIPSO measurements provide a good opportunity to investigate the vertical structure of the plumes and trace back the transport of the plumes. CALIPSO measures the backscattered signal at 532 and 1064 nm. One parallel channel and one perpendicular channel are coupled to derive particle linear depolarization ratio at 532 nm. Figure 7(a)–(f) present the profiles of the backscatter coefficient and particle linear depolarization ratio at 532 nm, corresponding to the six locations **a–f** in Figure 4.

These data were obtained from the NASA Langley Research Center Atmospheric Science Data Center. The six locations are intendedly selected, falling in the region with elevated UVAI and CO concentration and following the transport pathway of the plume (in Figure 5 and 6) from Canada to Europe. Figure 7 shows the enhancements of backscatter in the upper troposphere and lower stratosphere. Aerosol and cloud are both possible causes of the backscatter enhancements and can be distinguished by using the particle depolarization ratio. We have examined the temperature profiles over several sites in North America in August 2017 and found that, above 10 km, the temperature drops below  $-38^{\circ}\text{C}$ , at this temperature clouds consist mainly of ice crystals. The typical depolarization ratio is usually above 0.40 for ice cloud and from a few percent to about 0.40 for mixed-phase cloud.

Figure 7(a) and (b) show the aerosol layers observed on 14 and 15 August over the north of Canada, both locations lay in the area where MODIS observed a smoke plume on 15 August (Figure 4) and the area with high UVAI and CO concentration. The particle linear depolarization ratio is about 0.05 in Figure 7(a) and 0.10 in (b), meaning that it is an aerosol layer instead of ice or mixed-phase cloud. Figure 7(c) and (f) show stratospheric layers detected at 10–20 km height, with the depolarization varying from 0.10 to 0.18. The lower layer at about 9 km in Figure 7(d) has depolarization ratio between 0.20 and 0.45 (median 0.32), which falls into the category of ice or mixed-phase clouds. Profiles in Figure 7(f) were captured over Berlin at 0129 UTC on 23 August. About 150 km in the south-west, a Lidar in Leipzig measured stratospheric smoke layers (Haarig et al., 2018). The particle depolarization ratio of CALIPSO at 532 nm on 23 August is consistent with ground based Lidar measurements in Lille and Leipzig, which will be presented in Section 4. **It should be noted that aerosol types of the plumes in Figure 7 are quite uncertain in CALIPSO product. These layers are classified to scattered aerosol types, such as polluted dust, elevated smoke, dust and volcanic ash. This mis-classification could introduce some extent of errors to the backscatter profile and particle depolarization profiles.**

## 4 Results and analysis

### 4.1 Overview of retrieved optical parameters

We selected and averaged the Lidar measurement in 10 time intervals, among which five periods are from LILAS system in Lille: 2200 (24 August) – 0030 UTC (25 August), 1300 – 1600 UTC, 1600 – 1800 UTC (29 August), 2000 – 2300 (31 August) and 2300 (31 August) – 0200 UTC (01 September); two intervals from IPRAL system in Palaiseau: 1600 – 1800 UTC and 1920 – 2120 UTC (28 August) and three intervals from the mobile Lidar in MAMS system (29 August): 1400 – 1500 UTC (corresponding spatially to 100 km distance from Palaiseau to Compiègne), 1500 – 1545 UTC (100 km on the route from Compiègne to Arras) and 1615 – 1630 UTC at Lille.

Figure 8 shows the optical depth of the stratospheric layer varying from 0.05 to 0.23 (at 532 nm). The spectral dependence of the optical depth of 355 nm and 532 nm is very weak. The maximal optical depth of the stratospheric layer was observed in the afternoon of 29 August, between 1600 and 1800 UTC. LILAS system observed aerosol optical depth of  $0.20 \pm 0.04$  at 355 nm and  $0.21 \pm 0.04$  at 532 nm. As discussed in Section 3.1, the columnar AOD at 532 nm from AERONET increased by about

0.20 after the presence of the stratospheric layer, which agrees well with the derived optical depth of the stratospheric layer. The minimum of the optical depth appeared in the night of 31 August 2017, giving  $0.04 \pm 0.02$  at 355 nm and  $0.05 \pm 0.02$  at 532 nm. The optical depth of the stratospheric layer along the route, observed by MAMS, are as follows: 0.19 over a distance of 100 km North from Palaiseau, 0.23 along 100 km of the middle of the transect from Compiègne to Arras and 0.22 when arriving at Lille.

Due to the insufficient signal-to-noise ratio above the stratospheric plume, the MAMS Lidar measurements are processed using Klett method, constraint by the columnar AOD measured by PLASMA sun photometer. Klett inversion is performed to the Lidar profile from the surface to the top of the stratospheric layer, assuming a vertically independent Lidar ratio. The optical depth of the stratospheric smoke layer is then calculated from the integral of the extinction profile. As a result, the error of the estimated smoke optical depth from MAMS measurements is difficult to quantify. Here we present the optical depth from MAMS Lidar for a comparison.

Table 2 summarizes the Lidar ratio and particle depolarization ratio in the stratospheric aerosol layer. Lidar ratios vary between  $54 \pm 9$  sr and  $58 \pm 23$  sr at 532 nm and between  $31 \pm 15$  sr and  $45 \pm 9$  sr at 355 nm. The results from two different Lidar systems and with different observation time agree well, indicating that the properties of the stratospheric layer are spatially and temporally stable. We derived higher Lidar ratio at 532 nm than at 355 nm which is a characteristic feature of aged smoke and has been observed in previous studies (Wandinger et al., 2002; Murayama et al., 2004; Müller et al., 2005; Sugimoto et al., 2010). In the night of 31 August, the error of Lidar ratio is about 30 – 35%, relatively higher than the other days because of the low optical depth. Although the error varies, the mean values of derived Lidar ratio are relatively stable. The particle depolarization ratio decreases as wavelength increases. At 1064 nm channel, the particle linear depolarization ratio is very stable, varying from  $0.040 \pm 0.006$  from  $0.05 \pm 0.008$ . At 532 nm channel, the depolarization is also stable, varying from  $0.18 \pm 0.03$  to  $0.20 \pm 0.03$ . The particle linear depolarization ratio at 355 nm increased from  $0.23 \pm 0.03$  on 24 August to  $0.28 \pm 0.08$  on 31 August. However, the increase is merely within the range of the uncertainties, thus making it difficult to conclude. The particle depolarization ratio at 532 nm is in good agreement with CALIPSO observations shown in Figure 7(c)–(f). The particle depolarization ratio at 355 nm measured by LILAS and IPRAL system is also consistent, meaning that the stratospheric aerosol layer observed in Lille and Palaiseau are likely originated from the same source. A Leipzig Lidar also observed stratospheric aerosol layers on 22 August 2017. They measured 0.23 at 355 nm, 0.18 at 532 nm and 0.04 at 1064 nm (Haarig et al., 2018), which are in good agreements with our observations.

The errors of particle depolarization ratio are calculated with the method in the Appendix. The estimated errors of the particle depolarization ratio are generally below 15%, except the 355 nm channel in the night of 31 August when the optical depth was the lowest in all the investigated observations. On 31 August, the backscatter ratio, volume depolarization ratio and molecular depolarization ratio at 355 nm are approximately: 3.5 (50%), 0.15 (10%) and 0.004 (200%). The values in the parentheses are the relative errors of the quantity on the left. The resulting error of particle depolarization is about 28%. At 532 nm channel, we derive 12% of error for the particle depolarization ratio when the backscatter ratio, volume depolarization ratio and molecular depolarization ratio are: 10 (50%), 0.15 (10%) and 0.004 (200%). In the same way, we derive less than 11% of error for the particle depolarization ratio at 1064 nm. The error at 355 nm is estimated to be higher than 532 and 1064 nm as the interferences

of molecular scattering is stronger at this channel. When the layer is optically thicker, for example, 24 August, the error of 355 nm is estimated to be less than 13%. Conservatively, we use 28% for the error of particle linear depolarization ratio at 355 nm on 31 August and 15% for the error of the rest particle depolarization ratio at three wavelengths.

## 4.2 Case study

### 5 4.2.1 Optical properties

We selected the night measurements of 24 August in Lille and 28 August in Palaiseau as two examples. The two systems were operating independently, so that the results from two different systems that measured at different time can be regarded as verifications for each other.

#### 24 August 2017, Lille

- 10 Figure 9 shows the retrieved optical properties of the stratospheric layer observed by LILAS system in the night of 24 August in Lille. The stratospheric aerosol layer is between 17 and 18 km, and we retrieved the extinction and backscatter profiles by assuming that the Lidar ratios are 36 sr at 355 nm and 54 sr at 532 nm. The Lidar ratio at 1064 nm channel is assumed to be 60 sr. The extinction coefficient within the layer is about  $0.14 - 0.22 \text{ km}^{-1}$  at 355 nm and 532 nm. [It should be noted that the profile of the extinction coefficient is similar to the backscatter coefficient profile, because we assume the aerosol lidar ratio](#)  
15 [is vertically constant within the smoke layer. Using Klett method avoids the effect of vertical smoothing which is required in calculation of Raman extinction. A comparison of backscatter coefficient profile has been made \(not shown\) using Klett and Raman method. We found that the difference of the backscatter coefficient profiles from the two methods are very close, indicating that our results are reliable.](#) The extinction-related Ångström exponent for 355 and 532 nm is around  $0.0 \pm 0.5$ , the backscatter-related Ångström exponent at corresponding wavelengths is about  $1.0 \pm 0.5$ . The particle depolarization ratios  
20 decrease as wavelength increases. The vertical variations of the extinction and backscatter-related Ångström exponent and particle depolarization is weak, indicating that the observed aerosol layer is homogenous.

#### 28 August 2017, Palaiseau

- Figure 10 shows the retrieved optical parameters from IPRAL observations at 1920 – 2120 UTC, 28 August 2017 in Palaiseau. The thickness of the stratospheric layer is about 2.5 km, spreading from 17 km to 19.5 km. Klett inversion was applied with  
25 estimated Lidar ratio of 36 sr at 355 nm and 58 sr at 532 nm. At 1064 nm the Lidar ratio was assumed to be 60 sr. The maximum extinction coefficient in the layer reached  $0.12 \text{ km}^{-1}$  at 532 nm. The extinction-related Ångström exponent between 355 nm and 532 nm is about  $-0.06 \pm 0.5$ . The corresponding backscatter Ångström exponent is about  $1.2 \pm 0.5$ . The particle linear depolarization ratio at 355 nm is about  $0.27 \pm 0.04$ . The particle linear depolarization ratio at 355 nm, extinction and backscatter-related Ångström exponent between 355 nm and 532 nm do not show evident vertical variations.

30

### 4.2.2 Microphysical properties

Regularization algorithm is applied to the vertically averaged extinction coefficients (at 355 and 532 nm) and backscatter coefficients (at 355, 532 and 1064 nm) in Figure 9 and Figure 10. Treating non-spherical particles is a challenging task. Many studies have been done to model the light scattering of non-spherical particles. The spheroid model was used to retrieved dust properties (Dubovik et al., 2006; Mishchenko et al., 1997; Veselovskii et al., 2010). But it is not clear if this model is applicable to soot particles with complicated morphology. The size of smoke particles is expected not too big so that we choose to apply regularization algorithm with sphere model. The particle linear depolarization ratio is not used in the retrieval, and the spectral dependence of complex refractive indices is also ignored in the retrieval. The derived effective radius ( $R_{eff}$ ), volume concentration ( $V_c$ ), the real ( $m_R$ ) and imaginary ( $m_I$ ) part of the refractive indices are summarized in Table 3. The errors of the retrieved parameters have been discussed in the relevant papers (Müller et al., 1999; Veselovskii et al., 2002; Pérez-Ramírez et al., 2013).

The retrieved particle size distributes in the range of 0.1 to 1.0  $\mu\text{m}$ , with effective radius (volume-weighted sphere radius) of  $0.33 \pm 0.10$  for both Palaiseau data and Lille data. The volume concentration is  $15 \pm 5 \mu\text{m}^3\text{cm}^{-3}$  for Palaiseau data and  $22 \pm 7 \mu\text{m}^3\text{cm}^{-3}$  for Lille data. The real part of the complex refractive indices retrieved from Lille and Palaiseau data are also in good agreement, giving  $1.55 \pm 0.05$  and  $1.52 \pm 0.05$  for the real part, and  $0.028 \pm 0.014$  and  $0.021 \pm 0.010$  for the imaginary part. The single scattering albedos are estimated to be 0.82–0.89 for Lille data and 0.86–0.90 for Palaiseau data. The derived aerosol microphysical properties from Palaiseau and Lille data are consistent.

### 4.2.3 Direct radiative forcing effect

The stratospheric plumes observed on 24 and 28 August in Lille and Palaiseau are optically thick, with extinction coefficient about 10 times higher than in the volcanic ash observed by Ansmann et al. (1997) in April 1992, 10 months after the eruption of Mount Pinatubo. The radiative forcing imposed by the observed layers is a curious question. We input the retrieved microphysical properties into GARRLiC/GRASP to estimate the DRF effect of the stratospheric plumes in Lille and Palaiseau. We assume the vertical volume concentration of aerosols follows the extinction profile in Figure 9 and 10. The surface BRDF parameters for Lille and Palaiseau are taken from AERONET. The upward and downward flux/efficiencies, as well as the net DRF ( $\Delta F$ , with respect to a pure Rayleigh atmosphere) of the stratospheric aerosol layers are calculated and Table 4 shows the daily averaged net DRF ( $\text{W/m}^2$ ) at four levels: at the bottom of the atmosphere (BOA), below the stratospheric layer, above the stratospheric layer and at the top of the atmosphere (TOA). For the layer observed in Lille on 24 August, the top and base of the stratosphere are selected as: 18.4 km and 16.7 km and for Palaiseau observations, they are 20 km and 17.0 km.

At the top of the atmosphere, the net DRF flux is estimated to be  $-1.2 \text{ Wm}^{-2}$  and  $-3.5 \text{ Wm}^{-2}$  for Lille and Palaiseau data, respectively. The corresponding forcing efficiencies are  $-7.9 \text{ Wm}^{-2}\tau^{-1}$  and  $-21.5 \text{ Wm}^{-2}\tau^{-1}$ . At the bottom of the atmosphere, the net DRF flux is estimated to  $-12.3 \text{ Wm}^{-2}$  for Lille data and  $-14.5 \text{ Wm}^{-2}$  for Palaiseau data. The corresponding forcing efficiencies are  $-79.6 \text{ Wm}^{-2}\tau^{-1}$  and  $-89.6 \text{ Wm}^{-2}\tau^{-1}$ . We noticed that the difference in net DRF flux between the layer top and layer base is significant. For Lille data, we obtained  $9.9 \text{ W/m}^2$  of difference between the top and the base of

the stratospheric layer and for Palaiseau, we obtained  $11.1 \text{ W/m}^{-2}$ . Because of the high imaginary part of refractive indices, the stratospheric aerosols have the capacity of absorbing the incoming radiation, thus reducing the upward radiation at the top of the stratospheric layer and the downward radiation at the base of the stratospheric aerosol layer. The heating rate of the stratospheric layer is estimated to be  $3.3 \text{ K/day}$  for Palaiseau data and  $3.7 \text{ K/day}$  for Lille data. This qualitatively explains the increase of temperature within the stratospheric layer, as observed by the radiosonde measurements shown in Figure 3.

## 5 Discussion

The measurements revealed high particle depolarization ratios in the stratospheric smoke at 355 and 532 nm. In particular, the particle depolarization ratio at 355 nm is  $0.23 \pm 0.03$  to  $0.28 \pm 0.08$ , while at 532 nm it is about  $0.19 \pm 0.03$ . The depolarization ratio at 1064 nm is significantly lower, about  $0.05 \pm 0.01$ . Similar spectral dependence of depolarization ratio: 0.20, 0.09 and 0.02 at 355, 532 and 1064 nm, respectively, was observed by Burton et al. (2015) in a smoke plume at 7–8 km altitude (on 17 July 2014) in North American wildfires. Particle depolarization ratio of 0.07 and 0.02 at 532 and 1064 nm, respectively, were observed in a Canadian smoke plume at 6 km (on 02 August 2007) over the US (Burton et al., 2012). In Burton et al. (2012), the smoke traveled approximately 3 days and the smoke travel time is about 6 days in Burton et al. (2015). The travel time in both cases are shorter than in our study. The processes of the light scattering, leading to high particle depolarization ratio of smoke particles are not well understood. In previous studies, smoke mixed with soil particles was suggested to be the explanation (Fiebig et al., 2002; Murayama et al., 2004; Müller et al., 2007a; Sugimoto et al., 2010; Burton et al., 2012, 2015; Haarig et al., 2018). Strong convections occurred in fire activities, in principle are capable to lift soil particles into the smoke plume (Sugimoto et al., 2010).

High depolarization ratio with similar spectral dependence has been observed in fine dust particles. Miffre et al. (2016) measured the particle depolarization ratio of two Arizona Test Dust samples at backscattering angle. The radii of the dust samples distributed within  $1 \mu\text{m}$ . They obtained higher depolarization ratio at 355 nm than at 532 nm and the depolarization ratio at both wavelengths are over 0.30. The sharp edges and corners in the artificial dust samples are also a possible reason for the measured high particle depolarization ratio. In the study of Järvinen et al. (2016), over 200 dust samples were used to measure the near-backscattering ( $178^\circ$ ) properties and it is found that, for fine-mode dust, the depolarization has a strong size dependence. Järvinen et al. (2016) obtained about 0.12–0.20 and 0.25–0.30 depolarization ratio for corresponding particle size parameters at 355 and 532 nm in this study. Sakai et al. (2010) measured the depolarization of Asian and Saharan dust in the backscattering direction and obtained 0.14–0.17 at 532 nm for the samples with only sub-micrometer particles and 0.39 for the samples with high concentration of super-micrometer particles. Mamouri and Ansmann (2017) concluded that the depolarization spectrum of fine dust is:  $0.21 \pm 0.02$  at 355 nm,  $0.16 \pm 0.02$  at 532 nm and  $0.09 \pm 0.02$  at 1064 nm. This spectrum is very similar with the Canadian stratospheric plume presented in this study and Haarig et al. (2018). However, Murayama et al. (2004) suggested that the coagulation of smoke particles to the clusters with complicated morphology is a more reasonable explanation because they found no signature of mineral dust after analyzing the chemical compositions of the smoke samples. The impact of smoke aging process on the morphology has been presented by Müller et al. (2007b) that concluded that the size of tropospheric

smoke particles from boreal fires grows with travel time. Mishchenko et al. (2016) modeled the spectral depolarization ratios observed by Burton et al. (2015) and found that such behavior is resulted from complicated morphology of smoke particles. Kahnert et al. (2012) modeled the optical properties of light absorbing carbon aggregates (LAC) embedded in a sulfate shell. It was found that the particle depolarization ratio increases with the aggregate radius (volume-equivalent sphere radius). For the case of  $0.4\ \mu\text{m}$  aggregate radius and 20% LAC volume fraction, the computed depolarization ratios are 0.12–0.20 at 304.0 nm, 0.08–0.18 at 533.1 nm and about 0.015 at 1010.1 nm, which are comparable with the results in this study and Haarig et al. (2018). In this study, we are not able to assess which is the dominant factor for the high depolarization ratios, possibly both soil particles and smoke aging process are partially responsible.

The derived Lidar ratios are in the range of  $31 \pm 15$  sr to  $45 \pm 9$  sr for 355 nm and  $54 \pm 12$  sr to  $58 \pm 9$  sr for 532 nm. Considering the uncertainties of the Lidar ratio, the derived values and the spectral dependence agree well with previous publications (Müller et al., 2005; Sugimoto et al., 2010; Haarig et al., 2018) for aged smoke observations. The retrieved effective radius is about  $0.33 \pm 0.10\ \mu\text{m}$ , consistent with the particle size obtained by Haarig et al. (2018). The particle size is larger than the values of fresh smoke observed near the fire source (O'Neill et al., 2002; Nicolae et al., 2013). In particular, the retrieved particle size agrees well with the observed smoke aerosol transported from Canada to Europe (Wandinger et al., 2002; Müller et al., 2005). Müller et al. (2007b) found that the effective radius increased from  $0.15 - 0.25\ \mu\text{m}$  (2–4 days after the emission) to  $0.3 - 0.4\ \mu\text{m}$  after 10–20 days of transport time, which is consistent with our results. But it is worthy to be noted that Müller et al. (2007b) investigated only tropospheric smoke.

The real part of the refractive indices obtained in this study is  $1.52 \pm 0.05$  for Palaiseau data and  $1.55 \pm 0.05$  for Lille data, without considering the spectral dependence. The values are consistent with the results for smoke aerosol in the troposphere (Dubovik et al., 2002; Wandinger et al., 2002; Taubman et al., 2004; Müller et al., 2005). As to the imaginary part, we derived  $0.021 \pm 0.010$  from Palaiseau data and  $0.028 \pm 0.014$  from Lille data. The imaginary part of the refractive indices in previous studies is diverse. Müller et al. (2005) reported the imaginary part varying around 0.003 for non-absorbing tropospheric smoke originated from aged Siberian and Canadian forest fire. Wandinger et al. (2002) obtained 0.05–0.07 for the imaginary part of Canadian smoke in the troposphere over Europe. Dubovik et al. (2002) derived about 0.01 to 0.03 for the imaginary part of biomass burning using photometer observation. The retrieved imaginary part in our study falls into the range of previously reported values. Using sphere model in the inversion is potentially an important error source, as spheres cannot fully represent the scattering of irregular smoke particles. The application on dust particles (Veselovskii et al., 2010) demonstrated that retrieved volume concentration and effective radius are still reliable and the main error is attributed to the imaginary part of refractive index.

The relative humidity in the smoke layer is one factor that impacts the refractive index of smoke particles, the depolarization ratio and Lidar ratio as well, while in some studies, the relative humidity is not mentioned. The contamination of other aerosol types during the transport is also a potential cause of the modification of aerosol properties, and its impact is not limited to the refractive indices. In this study, the smoke layers we observed were lofted to the lower stratosphere in the source region and then transported to the observation sites by advection. It is isolated from other tropospheric aerosol sources and not likely to

mix with them during the transport. The relative humidity in the stratospheric layer is below 10%, according to the radiosonde measurements. Our study provides a reference for aged smoke aerosols in a dry condition.

The retrieved particle parameters allow an estimation of direct aerosol radiative forcing. We derived  $-79.6 \text{ Wm}^{-2}\tau^{-1}$  and  $-7.9 \text{ Wm}^{-2}\tau^{-1}$  for the DRF efficiencies at the bottom and the top of the atmosphere for Lille data. And for Palaiseau data, we derived  $-89.6 \text{ Wm}^{-2}\tau^{-1}$  and  $-21.5 \text{ Wm}^{-2}\tau^{-1}$ . It indicates that the observed stratospheric aerosol layers reduce strongly the radiation reaching the terrestrial surface mainly by absorbing the solar radiation. Derimian et al. (2016) evaluated the radiative effect of several aerosol models, among which the daily net DRF efficiency of biomass burning aerosols is estimated to be  $-74 \text{ Wm}^{-2}\tau^{-1}$  to  $-54 \text{ Wm}^{-2}\tau^{-1}$  at the bottom of the atmosphere. Mallet et al. (2008) studied the radiative forcing of smoke and dust mixture over Djougou and derived  $-68 \text{ Wm}^{-2}\tau^{-1}$  to  $-50 \text{ Wm}^{-2}\tau^{-1}$  for the DRF efficiency at the bottom of the atmosphere. The uncertainties of the DRF estimation could be large, because the high uncertainty in the retrieved microphysical properties, especially the imaginary part of the refractive index. Our results show stronger forcing efficiencies, but are comparable with the values in the publications. Additionally, the mean heating rate of the stratospheric aerosol layer is estimated to be 3.7 K/day for Lille data and 3.3 K/day for Palaiseau data, which qualitatively supports the temperature increase within the stratospheric smoke layer. The warming effect in the layer is potentially responsible for the upward movements of soot-containing aerosol plumes (Laat et al., 2012; Ansmann et al., 2018).

## 6 Conclusion

In the summer of 2017, large-scale wildfires spread in the west and north of Canada. In the mid-August, severe fire activities generated strong convections that lofted smoke plumes up to the upper troposphere lower stratosphere. After long-range transport, the smoke plumes spread over large areas. Three lidar systems in norther France observed aged smoke plumes in the stratosphere, about 10–15 days after intense smoke emission. Unlike fresh smoke particles, the aged smoke particles show surprisingly high particle depolarization ratios, indicating the presence of irregular smoke particles. Lidar data inversion revealed that the smoke particles are relatively bigger and very absorbing. The self-heating resulted from the strong absorption of the observed smoke plumes is related to the perturbation of the temperature profile and the ascent of the plume when exposed to sunlight. In addition, the DRF estimation indicated that the stratospheric aerosols strongly reduce the radiation reaching the bottom of the atmosphere.

This study shows the capability of multi-wavelength Raman Lidar in aerosol profiling and characterization. We reported important optical and microphysical properties derived from Lidar observations, these results help to improve our knowledge about smoke particles and aerosol classification with is an important topic in the Lidar community. Moreover, this event is also a good opportunity for the study of atmospheric model. The injection of smoke into upper troposphere and lower stratosphere by strong convection needs to be considered in atmospheric models. The self-lifting of absorbing smoke is not yet considered in any aerosol transport model. Additionally, this event provides a favorable chance for the studying smoke aging process, the smoke plumes stayed more than one month in the stratosphere and were observed by ground-based Lidars and CALIPSO. However, much more efforts are needed in investigating these measurements.

*Data availability.* The satellite data from OMPS and AIRS can be found in NASA's GES DIS service center. CALIPSO data are obtained from the Langley Atmospheric Science Data Center. The radiosonde data are taken from the website of University of Wyoming (<http://weather.uwyo.edu/upperair/sounding.html>). All the lidar data used in this paper and data processing code or softwares are available upon request to the corresponding author.

- 5 *Author contributions.* QH carried the experiments in Lille station, processed the data and wrote the manuscript. PG supervised the project and did the manuscript correction. IV helped in the data analysis and manuscript correction. JBA contributed in providing IPRAL measurements and manuscript correction. IP performed experiments using MAMS system, analyzed the data and did manuscript corrections. TP contributed in LILAS measurements and calibration (with QH). MH and CP helped in manuscript correction and IPRAL operation, respectively. The work of AL and XH contributed in developing and implementing GARRLiC/GRASP algorithm and radiative transfer code, respectively, for
- 10 data analysis. CC helped in obtaining and interpreting satellite products. BT helped in the manuscript correction.

- Acknowledgements.* We wish to thank ESA/IDEAS program who supported this work. FEDER/Region Hauts-de-France and CaPPA Labex are acknowledged for their support for LILAS multi-wavelength Raman LiDAR and MAMS system. H2020-ACTRIS-2/LiCAL Calibration center, EARLiNET, ACTRIS-France, ANRT France, CIMEL Electronique and Service National Observation PHOTONS/AERONET from CNRS-INSU are acknowledged for their support. The development of Lidar retrieval algorithms was supported by Russian Science Founda-
- 15 tion (project 16-17-10241). The authors would like to acknowledge the use of GRASP inversion algorithm (<http://www.grasp-open.com>) in this work. NASA and the Langley Atmospheric Science Data Center are acknowledged for providing satellite products. The SIRTa observatory and supporting institutes are acknowledged for providing IPRAL data. Finally we thank all the co-authors for their kind cooperation and professional help.

## Appendix A: Error estimation

### A1 Errors of optical depth

The errors in the Lidar signal at the top and the base of the stratospheric layers are considered as the major error sources in the error estimation of the optical depth. We estimate the error of the Lidar signal  $\bar{P}(\lambda, r_{top})$  and  $\bar{P}(\lambda, r_{base})$  to be 3–5%, based on the statistical error of photon distributions. According to Equation 2, the error of the optical depth,  $\frac{\Delta\tau^u}{\tau^u}$ , is written as:

$$\left(\frac{\Delta\tau^u}{\tau^u}\right)^2 = F_{\bar{P}_{top}} \left(\frac{\Delta\bar{P}(\lambda, r_{top})}{\bar{P}(\lambda, r_{top})}\right)^2 + F_{\bar{P}_{base}} \left(\frac{\Delta\bar{P}(\lambda, r_{base})}{\bar{P}(\lambda, r_{base})}\right)^2 \quad (A1)$$

$$F_{\bar{P}_{top, base}} = \left(\frac{\bar{P}(\lambda, r_{top, base})}{\tau^u} \frac{\partial\tau^u}{\partial\bar{P}(\lambda, r_{top, base})}\right)^2 \quad (A2)$$

where  $\Delta$  represents the absolute error of the quantity behind it. The calculation of molecular extinction and backscattering coefficient is based on the study of (Bucholtz, 1995). The temperature and pressure profiles are taken from the closest radiosonde stations, Trappes and Beauvechain, so we expect the errors of molecular scattering are negligible.

The error of optical depth propagates into the error of Lidar ratio and vertically integrated backscatter coefficient. Additionally, the error of the Lidar ratio also relies on the step length of Lidar ratio between two consecutive iterations and the fitting error of the optical depth of the stratospheric aerosol layer, which can be limited by narrowing the step of the iteration. In our calculation, we use a step of 0.5 sr and achieve the fitting error of optical depth less than 1% which is negligible compared to the contribution of the error of optical depth to the error estimation of the Lidar ratio. However, we can basically estimate the error of the integral of the backscatter coefficient within the stratospheric aerosol layer, not the error of the backscatter coefficient profile.

### A2 Errors of Ångström exponent

Ångström exponent  $\mathring{A}$  is defined as follows:

$$\frac{x_{\lambda_1}}{x_{\lambda_2}} = \left(\frac{\lambda_1}{\lambda_2}\right)^{-\mathring{A}} \quad (A3)$$

where  $x$  is usually the optical quantities such as optical depth  $\tau$ , extinction coefficient  $\alpha$  and backscatter coefficient  $\beta$ . The error of the Ångström exponent is resulted from the error of the optical quantities of the two involved wavelengths:

$$(\Delta\mathring{A})^2 = \left(\log\left(\frac{\lambda_1}{\lambda_2}\right)\right)^{-2} \left[\left(\frac{\Delta x_{\lambda_1}}{x_{\lambda_1}}\right)^2 + \left(\frac{\Delta x_{\lambda_2}}{x_{\lambda_2}}\right)^2\right] \quad (A4)$$

where  $\Delta x$  is the error of the quantity  $x$  in absolute values. In our study, when the error is 15% in the optical depth at 355 and 532 nm. The resulting error in the Ångström exponent is about 0.5.

### A3 Errors of particle depolarization ratio

According to Equation 3, the error of particle depolarization ratio lies in three terms: the backscatter ratio  $R$ , volume depolarization  $\delta_v$  ratio and molecular depolarization ratio  $\delta_m$ .

$$\left(\frac{\Delta\delta_p}{\delta_p}\right)^2 = F_R\left(\frac{\Delta R}{R}\right)^2 + F_{\delta_v}\left(\frac{\Delta\delta_v}{\delta_v}\right)^2 + F_{\delta_m}\left(\frac{\Delta\delta_m}{\delta_m}\right)^2 \quad (\text{A5})$$

$$F_X = \left(\frac{X}{\delta_p} \frac{\partial\delta_p}{\partial X}\right)^2, X = R, \delta_v, \delta_m \quad (\text{A6})$$

- 5 As the backscatter ratio and the volume depolarization increase, the dependence of particle depolarization ratio on the backscatter ratio gets much weaker. In the stratospheric smoke layer, the measured volume depolarization ratio is higher in the shorter wavelength and the backscatter ratio is higher in the longer wavelength, the increased volume depolarization ratio or the backscatter ratio allow us to conservatively assume a preliminary error level for the backscatter ratio  $R$ . The potential error sources of the volume depolarization come from the optics and the polarization calibration. The optics have been carefully
- 10 maintained and adjusted to minimize the errors originated from misalignments. After long-term Lidar operation and monitoring of the depolarization calibration, we conservatively expect 10% relative errors in the volume depolarization ratio. The theoretical molecular depolarization ratio is calculated to be 0.0036 with negligible wavelength dependence. In the historical record since 2013, LILAS measured molecular depolarization ratios approximately 0.008–0.013 at 532 nm channel, 0.012–0.018 at 355 nm channel and 0.007–0.010 at 1064 nm channel. IPRAL measured molecular depolarization ratio about 0.020
- 15 at 355 nm in this study. Molecular depolarization ratios measured by both LILAS and IPRAL system exceed the theoretical value. Regardless of the error in the polarization calibration, the error of molecular depolarization ratio rises mainly from the optics, precisely, the cross-talks between the two polarization channels. The imperfections of the optics cannot be avoided, but a careful characterization is helpful to eliminate the cross-talks as much as possible (Freudenthaler, 2016). In our study, we simply assume 200% and 300% for the error of molecular depolarization ratio measured by LILAS and IPRAL system,
- 20 respectively. In the following section, the total error of particle depolarization ratio is calculated according to Equation A5.

## References

- Andreae, M. O., Browell, E. V., Garstang, M., Gregory, G., Harriss, R., Hill, G., Jacob, D. J., Pereira, M., Sachse, G., Setzer, A., et al.: Biomass-burning emissions and associated haze layers over Amazonia, *Journal of Geophysical Research: Atmospheres*, 93, 1509–1527, 1988.
- 5 Ansmann, A., Riebesell, M., Wandinger, U., Weitkamp, C., Voss, E., Lahmann, W., and Michaelis, W.: Combined Raman elastic-backscatter lidar for vertical profiling of moisture, aerosol extinction, backscatter, and lidar ratio, *Applied Physics B: Lasers and Optics*, 55, 18–28, 1992.
- Ansmann, A., Mattis, I., Wandinger, U., Wagner, F., Reichardt, J., and Deshler, T.: Evolution of the Pinatubo aerosol: Raman lidar observations of particle optical depth, effective radius, mass, and surface area over Central Europe at 53.4 N, *Journal of the atmospheric sciences*, 54, 2630–2641, 1997.
- 10 Ansmann, A., Baars, H., Chudnovsky, A., Mattis, I., Veselovskii, I., Haarig, M., Seifert, P., Engelmann, R., and Wandinger, U.: Extreme levels of Canadian wildfire smoke in the stratosphere over central Europe on 21–22 August 2017, *Atmospheric Chemistry and Physics*, 18, 11 831–11 845, 2018.
- Böckmann, C., Wandinger, U., Ansmann, A., Bösenberg, J., Amiridis, V., Boselli, A., Delaval, A., De Tomasi, F., Frioud, M., Grigorov, I. V., et al.: Aerosol lidar intercomparison in the framework of the EARLINET project. 2. Aerosol backscatter algorithms, *Applied Optics*, 43, 977–989, 2004.
- 15 Bösenberg, J., Matthias, V., Linné, H., Comerón Tejero, A., Rocadenbosch Burillo, F., Pérez López, C., and Baldasano Recio, J. M.: EARLINET: A European Aerosol Research Lidar Network to establish an aerosol climatology, Report. Max-Planck-Institut für Meteorologie, pp. 1–191, 2003.
- 20 Bovchaliuk, V., Goloub, P., Podvin, T., Veselovskii, I., Tanre, D., Chaikovsky, A., Dubovik, O., Mortier, A., Lopatin, A., Korenskiy, M., et al.: Comparison of aerosol properties retrieved using GARRLiC, LIRIC, and Raman algorithms applied to multi-wavelength lidar and sun/sky-photometer data, *Atmospheric Measurement Techniques*, 9, 3391–3405, 2016.
- Bravo-Aranda, J. A., Belegante, L., Freudenthaler, V., Alados-Arboledas, L., Nicolae, D., Granados-Muñoz, M. J., Guerrero-Rascado, J. L., Amodeo, A., D’Amico, G., Engelmann, R., et al.: Assessment of lidar depolarization uncertainty by means of a polarimetric lidar simulator, *Atmospheric Measurement Techniques*, 9, 4935, 2016.
- 25 Bucholtz, A.: Rayleigh-scattering calculations for the terrestrial atmosphere, *Applied Optics*, 34, 2765–2773, 1995.
- Burton, S., Ferrare, R., Hostetler, C., Hair, J., Rogers, R., Obland, M., Butler, C., Cook, A., Harper, D., and Froyd, K.: Aerosol classification using airborne High Spectral Resolution Lidar measurements-methodology and examples, *Atmospheric Measurement Techniques*, 5, 73, 2012.
- 30 Burton, S., Hair, J., Kahnert, M., Ferrare, R., Hostetler, C., Cook, A., Harper, D., Berkoff, T., Seaman, S., Collins, J., et al.: Observations of the spectral dependence of linear particle depolarization ratio of aerosols using NASA Langley airborne High Spectral Resolution Lidar, *Atmospheric Chemistry and Physics*, 15, 13 453–13 473, 2015.
- Derimian, Y., Dubovik, O., Huang, X., Lapyonok, T., Litvinov, P., Kostinski, A. B., Dubuisson, P., and Ducos, F.: Comprehensive tool for calculation of radiative fluxes: illustration of shortwave aerosol radiative effect sensitivities to the details in aerosol and underlying surface characteristics, *Atmospheric Chemistry and Physics*, 16, 5763–5780, 2016.
- 35 Deshler, T.: A review of global stratospheric aerosol: Measurements, importance, life cycle, and local stratospheric aerosol, *Atmospheric Research*, 90, 223–232, 2008.

- Dubovik, O., Holben, B., Eck, T. F., Smirnov, A., Kaufman, Y. J., King, M. D., Tanré, D., and Slutsker, I.: Variability of absorption and optical properties of key aerosol types observed in worldwide locations, *Journal of the atmospheric sciences*, 59, 590–608, 2002.
- Dubovik, O., Sinyuk, A., Lapyonok, T., Holben, B. N., Mishchenko, M., Yang, P., Eck, T. F., Volten, H., Munoz, O., Veiðelmann, B., et al.: Application of spheroid models to account for aerosol particle nonsphericity in remote sensing of desert dust, *Journal of Geophysical Research: Atmospheres*, 111, 2006.
- Dubovik, O., Lapyonok, T., Litvinov, P., Herman, M., Fuertes, D., Ducos, F., Lopatin, A., Chaikovsky, A., Torres, B., Derimian, Y., et al.: GRASP: a versatile algorithm for characterizing the atmosphere, *SPIE Newsroom*, 25, 2014.
- Fiebig, M., Petzold, A., Wandinger, U., Wendisch, M., Kiemle, C., Stifter, A., Ebert, M., Rother, T., and Leiterer, U.: Optical closure for an aerosol column: Method, accuracy, and inferable properties applied to a biomass-burning aerosol and its radiative forcing, *Journal of Geophysical Research: Atmospheres*, 107, 2002.
- Freudenthaler, V.: About the effects of polarising optics on lidar signals and the Delta 90 calibration, *Atmospheric Measurement Techniques*, pp. 4181–4255, 2016.
- Freudenthaler, V., Esselborn, M., Wiegner, M., Heese, B., Tesche, M., Ansmann, A., Müller, D., Althausen, D., Wirth, M., Fix, A., et al.: Depolarization ratio profiling at several wavelengths in pure Saharan dust during SAMUM 2006, *Tellus B*, 61, 165–179, 2009.
- Freudenthaler, V., Linné, H., Chaikovski, A., Rabus, D., and Groß, S.: EARLINET lidar quality assurance tools, 2018.
- Fromm, M., Alfred, J., Hoppel, K., Hornstein, J., Bevilacqua, R., Shettle, E., Servranckx, R., Li, Z., and Stocks, B.: Observations of boreal forest fire smoke in the stratosphere by POAM III, SAGE II, and lidar in 1998, *Geophysical Research Letters*, 27, 1407–1410, 2000.
- Fromm, M., Bevilacqua, R., Servranckx, R., Rosen, J., Thayer, J. P., Herman, J., and Larko, D.: Pyro-cumulonimbus injection of smoke to the stratosphere: Observations and impact of a super blowup in northwestern Canada on 3–4 August 1998, *Journal of Geophysical Research: Atmospheres*, 110, 2005.
- Fromm, M., Shettle, E., Fricke, K., Ritter, C., Trickl, T., Giehl, H., Gerding, M., Barnes, J., O’Neill, M., Massie, S., et al.: Stratospheric impact of the Chisholm pyrocumulonimbus eruption: 2. Vertical profile perspective, *Journal of Geophysical Research: Atmospheres*, 113, 2008.
- Fromm, M. D. and Servranckx, R.: Transport of forest fire smoke above the tropopause by supercell convection, *Geophysical Research Letters*, 30, 2003.
- Haarig, M., Ansmann, A., Baars, H., Jimenez, C., Veselovskii, I., Engelmann, R., and Althausen, D.: Depolarization and lidar ratios at 355, 532, and 1064 nm and microphysical properties of aged tropospheric and stratospheric Canadian wildfire smoke, *Atmospheric Chemistry and Physics*, 18, 11 847–11 861, 2018.
- Haeffelin, M., Barthès, L., Bock, O., Boitel, C., Bony, S., Bouniol, D., Chepfer, H., Chiriaco, M., Cuesta, J., Delanoë, J., et al.: SIRTa, a ground-based atmospheric observatory for cloud and aerosol research, in: *Annales Geophysicae*, vol. 23, pp. 253–275, 2005.
- Haskins, R. and Kaplan, L.: Remote sensing of trace gases using the Atmospheric InfraRed Sounder, in: *IRS*, vol. 92, pp. 278–281, 1992.
- Hofmann, D., Barnes, J., O’Neill, M., Trudeau, M., and Neely, R.: Increase in background stratospheric aerosol observed with lidar at Mauna Loa Observatory and Boulder, Colorado, *Geophysical Research Letters*, 36, 2009.
- Hsu, N. C., Herman, J., Torres, O., Holben, B., Tanre, D., Eck, T., Smirnov, A., Chatenet, B., and Lavenue, F.: Comparisons of the TOMS aerosol index with Sun-photometer aerosol optical thickness: Results and applications, *Journal of Geophysical Research: Atmospheres*, 104, 6269–6279, 1999.
- Jaross, G.: OMPS-NPP L3 NM Ozone (O3) Total Column 1.0 deg grid daily V2, Greenbelt, MD, USA, Goddard Earth Sciences Data and Information Services Center (GES DISC), <https://doi.org/10.5067/7Y7KSA1QNQP8>, accessed: 2018-04-28, 2017.

- Järvinen, E., Kemppinen, O., Nousiainen, T., Kociok, T., Möhler, O., Leisner, T., and Schnaiter, M.: Laboratory investigations of mineral dust near-backscattering depolarization ratios, *Journal of Quantitative Spectroscopy and Radiative Transfer*, 178, 192–208, 2016.
- Kahn, B., Irion, F., Dang, V., Manning, E., Nasiri, S., Naud, C., Blaisdell, J., Schreier, M., Yue, Q., Bowman, K., et al.: The atmospheric infrared sounder version 6 cloud products, *Atmospheric Chemistry and Physics*, 14, 399, 2014.
- 5 Kahnert, M., Nousiainen, T., Lindqvist, H., and Ebert, M.: Optical properties of light absorbing carbon aggregates mixed with sulfate: assessment of different model geometries for climate forcing calculations, *Optics express*, 20, 10 042–10 058, 2012.
- Karol, Y., Tanré, D., Goloub, P., Vervaeke, C., Balois, J., Blarel, L., Podvin, T., Mortier, A., and Chaikovsky, A.: Airborne sun photometer PLASMA: concept, measurements, comparison of aerosol extinction vertical profile with lidar, *Atmospheric Measurement Techniques*, 6, 2383, 2013.
- 10 Khaykin, S., Godin-Beekmann, S., Hauchecorne, A., Pelon, J., Ravetta, F., and Keckhut, P.: Stratospheric smoke with unprecedentedly high backscatter observed by lidars above southern France, *Geophysical Research Letters*, 45, 1639–1646, 2018.
- Khaykin, S. M., Godin-Beekmann, S., Keckhut, P., Hauchecorne, A., Jumelet, J., Vernier, J.-P., Bourassa, A., Degenstein, D. A., Rieger, L. A., Bingen, C., et al.: Variability and evolution of the midlatitude stratospheric aerosol budget from 22 years of ground-based lidar and satellite observations, *Atmospheric Chemistry and Physics*, 17, 1829–1845, 2017.
- 15 Klett, J. D.: Lidar inversion with variable backscatter/extinction ratios, *Applied Optics*, 24, 1638–1643, 1985.
- Kremser, S., Thomason, L. W., Hobe, M., Hermann, M., Deshler, T., Timmreck, C., Toohey, M., Stenke, A., Schwarz, J. P., Weigel, R., et al.: Stratospheric aerosol? Observations, processes, and impact on climate, *Reviews of Geophysics*, 54, 278–335, 2016.
- Laat, A., Stein Zweers, D. C., and Boers, R.: A solar escalator: Observational evidence of the self-lifting of smoke and aerosols by absorption of solar radiation in the February 2009 Australian Black Saturday plume, *Journal of Geophysical Research: Atmospheres*, 117, 2012.
- 20 Lenoble, J., Herman, M., Deuzé, J., Lafrance, B., Santer, R., and Tanré, D.: A successive order of scattering code for solving the vector equation of transfer in the earth's atmosphere with aerosols, *Journal of Quantitative Spectroscopy and Radiative Transfer*, 107, 479–507, 2007.
- Lopatin, A., Dubovik, O., Chaikovsky, A., Goloub, P., Lapyonok, T., Tanré, D., and Litvinov, P.: Enhancement of aerosol characterization using synergy of lidar and sun-photometer coincident observations: the GARRLiC algorithm, *Atmospheric Measurement Techniques*, 6, 2065, 2013.
- 25 Luderer, G., Trentmann, J., Winterrath, T., Textor, C., Herzog, M., Graf, H., and Andreae, M.: Modeling of biomass smoke injection into the lower stratosphere by a large forest fire (Part II): sensitivity studies, *Atmospheric Chemistry and Physics*, 6, 5261–5277, 2006.
- Mallet, M., Pont, V., Lioussé, C., Gomes, L., Pelon, J., Osborne, S., Haywood, J., Roger, J.-C., Dubuisson, P., Mariscal, A., et al.: Aerosol direct radiative forcing over Djougou (northern Benin) during the African Monsoon Multidisciplinary Analysis dry season experiment (Special Observation Period-0), *Journal of Geophysical Research: Atmospheres*, 113, 2008.
- 30 Mamouri, R. and Ansmann, A.: Potential of polarization/Raman lidar to separate fine dust, coarse dust, maritime, and anthropogenic aerosol profiles, *Atmos. Meas. Tech*, 10, 3403–3427, 2017.
- Matthais, V., Freudenthaler, V., Amodeo, A., Balin, I., Balis, D., Bösenberg, J., Chaikovsky, A., Chourdakis, G., Comeron, A., Delaval, A., et al.: Aerosol lidar intercomparison in the framework of the EARLINET project. 1. Instruments, *Applied Optics*, 43, 961–976, 2004.
- 35 McMillan, W., Barnet, C., Strow, L., Chahine, M., McCourt, M., Warner, J., Novelli, P., Korontzi, S., Maddy, E., and Datta, S.: Daily global maps of carbon monoxide from NASA's Atmospheric Infrared Sounder, *Geophysical Research Letters*, 32, 2005.
- McPeters, R. D., Bhartia, P., Krueger, A. J., Herman, J. R., Wellemeyer, C. G., Seftor, C. J., Byerly, W., and Celarier, E. A.: Total Ozone Mapping Spectrometer (TOMS) Level-3 data products user's guide, 2000.

- Miffre, A., Mehri, T., Francis, M., and Rairoux, P.: UV–VIS depolarization from Arizona Test Dust particles at exact backscattering angle, *Journal of Quantitative Spectroscopy and Radiative Transfer*, 169, 79–90, 2016.
- Mishchenko, M. I., Travis, L. D., Kahn, R. A., and West, R. A.: Modeling phase functions for dustlike tropospheric aerosols using a shape mixture of randomly oriented polydisperse spheroids, *Journal of Geophysical Research: Atmospheres*, 102, 16 831–16 847, 1997.
- 5 Mishchenko, M. I., Dlugach, J. M., and Liu, L.: Linear depolarization of lidar returns by aged smoke particles, *Applied optics*, 55, 9968–9973, 2016.
- Müller, D., Wandinger, U., and Ansmann, A.: Microphysical particle parameters from extinction and backscatter lidar data by inversion with regularization: theory, *Applied Optics*, 38, 2346–2357, 1999.
- Müller, D., Mattis, I., Wandinger, U., Ansmann, A., Althausen, D., and Stohl, A.: Raman lidar observations of aged Siberian and Canadian  
10 forest fire smoke in the free troposphere over Germany in 2003: Microphysical particle characterization, *Journal of Geophysical Research: Atmospheres*, 110, 2005.
- Müller, D., Ansmann, A., Mattis, I., Tesche, M., Wandinger, U., Althausen, D., and Pisani, G.: Aerosol-type-dependent lidar ratios observed with Raman lidar, *Journal of Geophysical Research: Atmospheres*, 112, 2007a.
- Müller, D., Mattis, I., Ansmann, A., Wandinger, U., Ritter, C., and Kaiser, D.: Multiwavelength Raman lidar observations of particle growth  
15 during long-range transport of forest-fire smoke in the free troposphere, *Geophysical Research Letters*, 34, 2007b.
- Murayama, T., Müller, D., Wada, K., Shimizu, A., Sekiguchi, M., and Tsukamoto, T.: Characterization of Asian dust and Siberian smoke with multi-wavelength Raman lidar over Tokyo, Japan in spring 2003, *Geophysical Research Letters*, 31, 2004.
- Nicolae, D., Nemuc, A., Müller, D., Talianu, C., Vasilescu, J., Belegante, L., and Kolgotin, A.: Characterization of fresh and aged biomass burning events using multiwavelength Raman lidar and mass spectrometry, *Journal of Geophysical Research: Atmospheres*, 118, 2956–  
20 2965, 2013.
- O’Neill, N., Eck, T., Holben, B., Smirnov, A., Royer, A., and Li, Z.: Optical properties of boreal forest fire smoke derived from Sun photometry, *Journal of Geophysical Research: Atmospheres*, 107, 2002.
- Papayannis, A., Amiridis, V., Mona, L., Tsaknakis, G., Balis, D., Bösenberg, J., Chaikovski, A., De Tomasi, F., Grigorov, I., Mattis, I., et al.: Systematic lidar observations of Saharan dust over Europe in the frame of EARLINET (2000–2002), *Journal of Geophysical Research: Atmospheres*, 113, 2008.  
25
- Pappalardo, G., Amodeo, A., Apituley, A., Comeron, A., Freudenthaler, V., Linné, H., Ansmann, A., Bösenberg, J., D’Amico, G., Mattis, I., et al.: EARLINET: towards an advanced sustainable European aerosol lidar network, *Atmospheric Measurement Techniques*, pp. 2389–2409, 2014.
- Pérez-Ramírez, D., Whiteman, D., Veselovskii, I., Kolgotin, A., Korenskiy, M., and Alados-Arboledas, L.: Effects of systematic and random  
30 errors on the retrieval of particle microphysical properties from multiwavelength lidar measurements using inversion with regularization, *Atmospheric Measurement Techniques*, 6, 3039–3054, 2013.
- Platt, C.: Lidar and radiometric observations of cirrus clouds, *Journal of the atmospheric sciences*, 30, 1191–1204, 1973.
- Popovici, I. E., Goloub, P., Podvin, T., Blarel, L., Loisil, R., Unga, F., Mortier, A., Deroo, C., Victori, S., Ducos, F., et al.: Description and applications of a mobile system performing on-road aerosol remote sensing and in situ measurements, *Atmospheric Measurement  
35 Techniques Discussions*, 2018.
- Sakai, T., Nagai, T., Zaizen, Y., and Mano, Y.: Backscattering linear depolarization ratio measurements of mineral, sea-salt, and ammonium sulfate particles simulated in a laboratory chamber, *Applied optics*, 49, 4441–4449, 2010.

- Sassen, K., Liou, K. N., Kinne, S., and Griffin, M.: Highly supercooled cirrus cloud water: Confirmation and climatic implications, *Science*, 227, 411–413, 1985.
- Seftor, C., Jaross, G., Kowitt, M., Haken, M., Li, J., and Flynn, L.: Postlaunch performance of the Suomi National Polar-orbiting Partnership Ozone Mapping and Profiler Suite (OMPS) nadir sensors, *Journal of Geophysical Research: Atmospheres*, 119, 4413–4428, 2014.
- 5 Shepherd, T. G.: Transport in the middle atmosphere, *Journal of the Meteorological Society of Japan. Ser. II*, 85, 165–191, 2007.
- Sugimoto, N., Tatarov, B., Shimizu, A., Matsui, I., and Nishizawa, T.: Optical characteristics of forest-fire smoke observed with two-wavelength Mie-scattering lidars and a high-spectral-resolution lidar over Japan, *SOLA*, 6, 93–96, 2010.
- Susskind, J., Blaisdell, J. M., and Iredell, L.: Improved methodology for surface and atmospheric soundings, error estimates, and quality control procedures: the atmospheric infrared sounder science team version-6 retrieval algorithm, *Journal of Applied Remote Sensing*, 8, 084 994, 2014.
- 10 Taubman, B. F., Marufu, L. T., Vant-Hull, B. L., Piety, C. A., Doddridge, B. G., Dickerson, R. R., and Li, Z.: Smoke over haze: Aircraft observations of chemical and optical properties and the effects on heating rates and stability, *Journal of Geophysical Research: Atmospheres*, 109, 2004.
- Texeira, A. S. T.: AIRS/Aqua L3 Daily Standard Physical Retrieval (AIRS-only) 1 degree x 1 degree V006, Greenbelt, MD, USA, Goddard Earth Sciences Data and Information Services Center (GES DISC), <https://doi.org/10.5067/Aqua/AIRS/DATA303>, accessed: 2018-04-28, 2013.
- 15 Trentmann, J., Luderer, G., Winterrath, T., Fromm, M., Servranckx, R., Textor, C., Herzog, M., Graf, H.-F., and Andreae, M.: Modeling of biomass smoke injection into the lower stratosphere by a large forest fire (Part I): reference simulation, *Atmospheric Chemistry and Physics*, 6, 5247–5260, 2006.
- 20 Vallero, D.: *Fundamentals of air pollution*, Academic press, 2014.
- Veselovskii, I., Kolgotin, A., Griaznov, V., Müller, D., Wandinger, U., and Whiteman, D. N.: Inversion with regularization for the retrieval of tropospheric aerosol parameters from multiwavelength lidar sounding, *Applied optics*, 41, 3685–3699, 2002.
- Veselovskii, I., Dubovik, O., Kolgotin, A., Lapyonok, T., Di Girolamo, P., Summa, D., Whiteman, D. N., Mishchenko, M., and Tanré, D.: Application of randomly oriented spheroids for retrieval of dust particle parameters from multiwavelength lidar measurements, *Journal of Geophysical Research: Atmospheres*, 115, 2010.
- 25 Veselovskii, I., Goloub, P., Podvin, T., Bovchaliuk, V., Derimian, Y., Augustin, P., Fourmentin, M., Tanre, D., Korenskiy, M., Whiteman, D., et al.: Retrieval of optical and physical properties of African dust from multiwavelength Raman lidar measurements during the SHADOW campaign in Senegal, *Atmos. Chem. Phys*, 16, 7013–7028, 2016.
- Veselovskii, I., Goloub, P., Podvin, T., Tanre, D., Ansmann, A., Korenskiy, M., Borovoi, A., Hu, Q., and Whiteman, D.: Spectral dependence of backscattering coefficient of mixed phase clouds over West Africa measured with two-wavelength Raman polarization lidar: Features attributed to ice-crystals corner reflection, *Journal of Quantitative Spectroscopy and Radiative Transfer*, 202, 74–80, 2017.
- 30 Wandinger, U., Müller, D., Böckmann, C., Althausen, D., Matthias, V., Bösenberg, J., Weiß, V., Fiebig, M., Wendisch, M., Stohl, A., et al.: Optical and microphysical characterization of biomass-burning and industrial-pollution aerosols from-multiwavelength lidar and aircraft measurements, *Journal of Geophysical Research: Atmospheres*, 107, 2002.
- 35 Young, S. A.: Analysis of lidar backscatter profiles in optically thin clouds, *Applied optics*, 34, 7019–7031, 1995.
- Zuev, V. V., Burlakov, V. D., Nevzorov, A. V., Pravdin, V. L., Savelieva, E. S., and Gerasimov, V. V.: 30-year lidar observations of the stratospheric aerosol layer state over Tomsk (Western Siberia, Russia), *Atmospheric Chemistry and Physics*, 17, 3067–3081, 2017.

**Table 1.** Three involved lidar systems in this study

| Name       | Configuration                                                                        | Comment                                             |
|------------|--------------------------------------------------------------------------------------|-----------------------------------------------------|
| LILAS      | Elastic + depolarization: 355, 532, 1064 nm<br>Raman: 387, 408 (water vapor), 530 nm | in Lille                                            |
| IPRAL      | Elastic: 355 (depolarization), 532, 1064 nm<br>Raman: 387, 408 (water vapor), 608 nm | in Palaiseau                                        |
| MAMS Lidar | Elastic: 532 nm                                                                      | travel from Palaiseau<br>to Lille on 29 August 2017 |

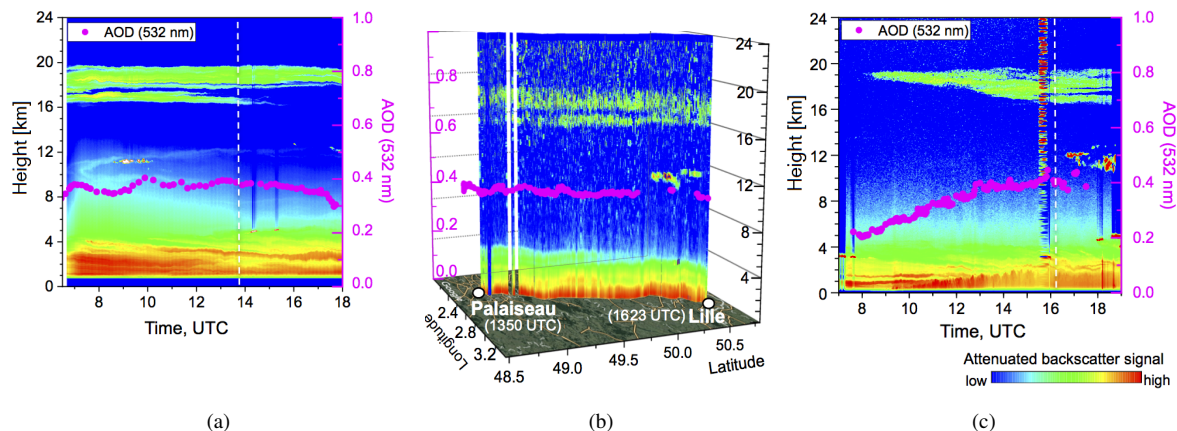

**Figure 1.** Lidar range-corrected signal and columnar AOD from sun photometer at 532 nm, 29 August 2017. (a) IPRAL system in Palaiseau. (b) MAMS Lidar on-route from Palaiseau to Lille. (c) LILAS in Lille. Columnar AOD measurements are interpolated from AERONET (Lille and Palaiseau) and PLASMA (mobile system) measurements. MAMS started from Palaiseau at 1353 UTC and arrived in Lille at 1623 UTC. The departure and arriving time are indicated in (a) and (c) with the white dashed lines.

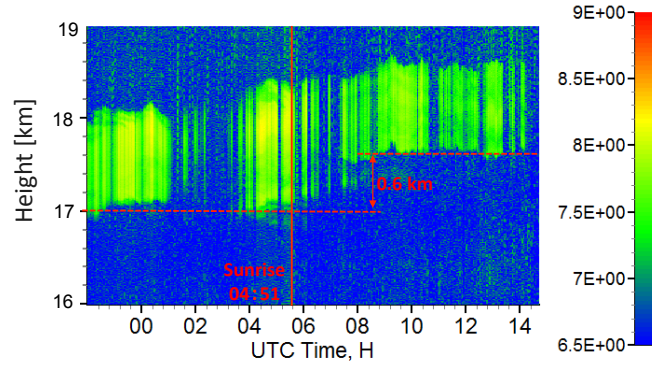

**Figure 2.** Lidar range-corrected signal at 1064 nm on 24–25 August 2017 measured by LILAS. The red solid line indicates the sunrise time. The two red dashed lines point out the approximate layer base before and after the sunrise. The sunrise and sunset time are 04:51 UTC and 20:47 UTC, respectively. The corresponding daytime duration is about 14 hours.

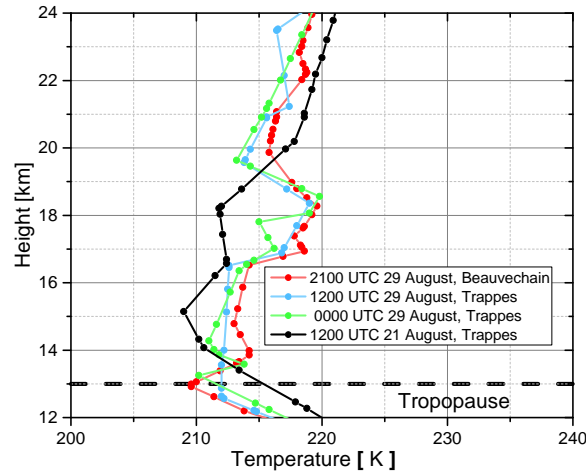

**Figure 3.** Temperature profiles from the radiosonde measurements. The green and cerulean lines are the temperature profiles of Trappes at 0000 and 1200 UTC, 29 August 2017. The red line shows the Beauvechain data at 2100 UTC 29 August 2017. The black line is for 1200 UTC, 21 August, Trappes. The horizontal black dashed line at 13 km represents the approximate position of the tropopause.

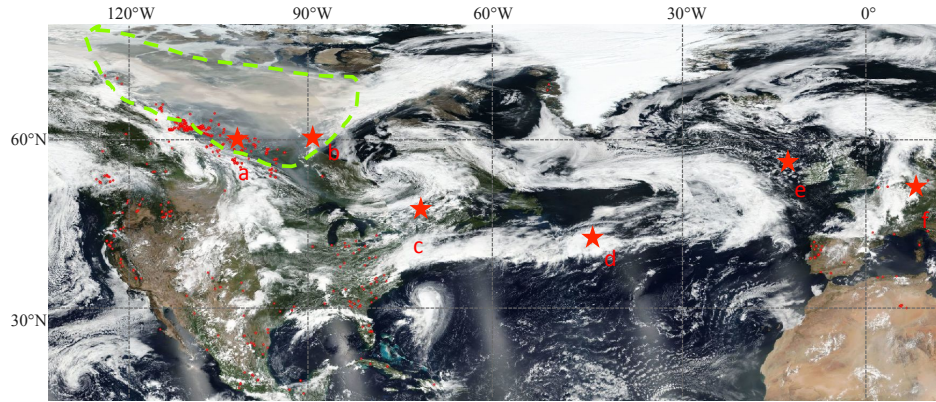

**Figure 4.** The corrected surface reflectance overlaid with fire and thermal anomalies from MODIS (15 August 2017). The region marked with green dashed line in the northwest indicated a plume generated by fire activities. Six locations (labeled as red stars) on the tracks of CALIPSO are selected: **a** (61.47°N, 106.44°W), **b** (62.79°N, 91.54°W), **c** (46.97°N, 72.22°W), **d** (42.27°N, 42.08°W), **e** (55.97°N, 12.54°W) and **f** (52.37°N, 13.47°E). The corresponding overpass date is 14, 15, 17, 19, 21 and 23 August 2017.

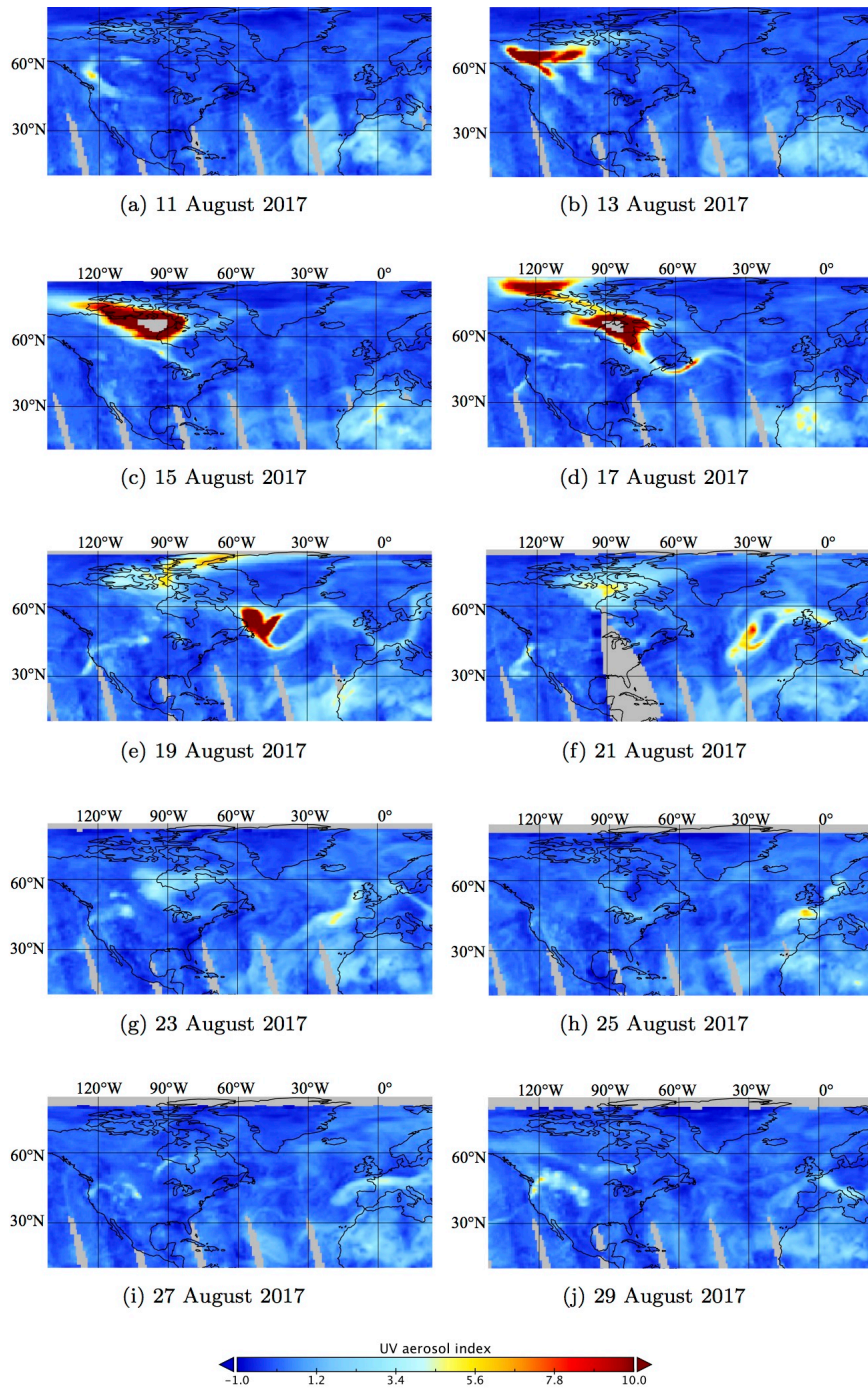

**Figure 5.** OMPS NM daily UVAI products during 11 to 29 August 2017. The results are plotted every two days. Grey colour indicates areas with no retrievals.

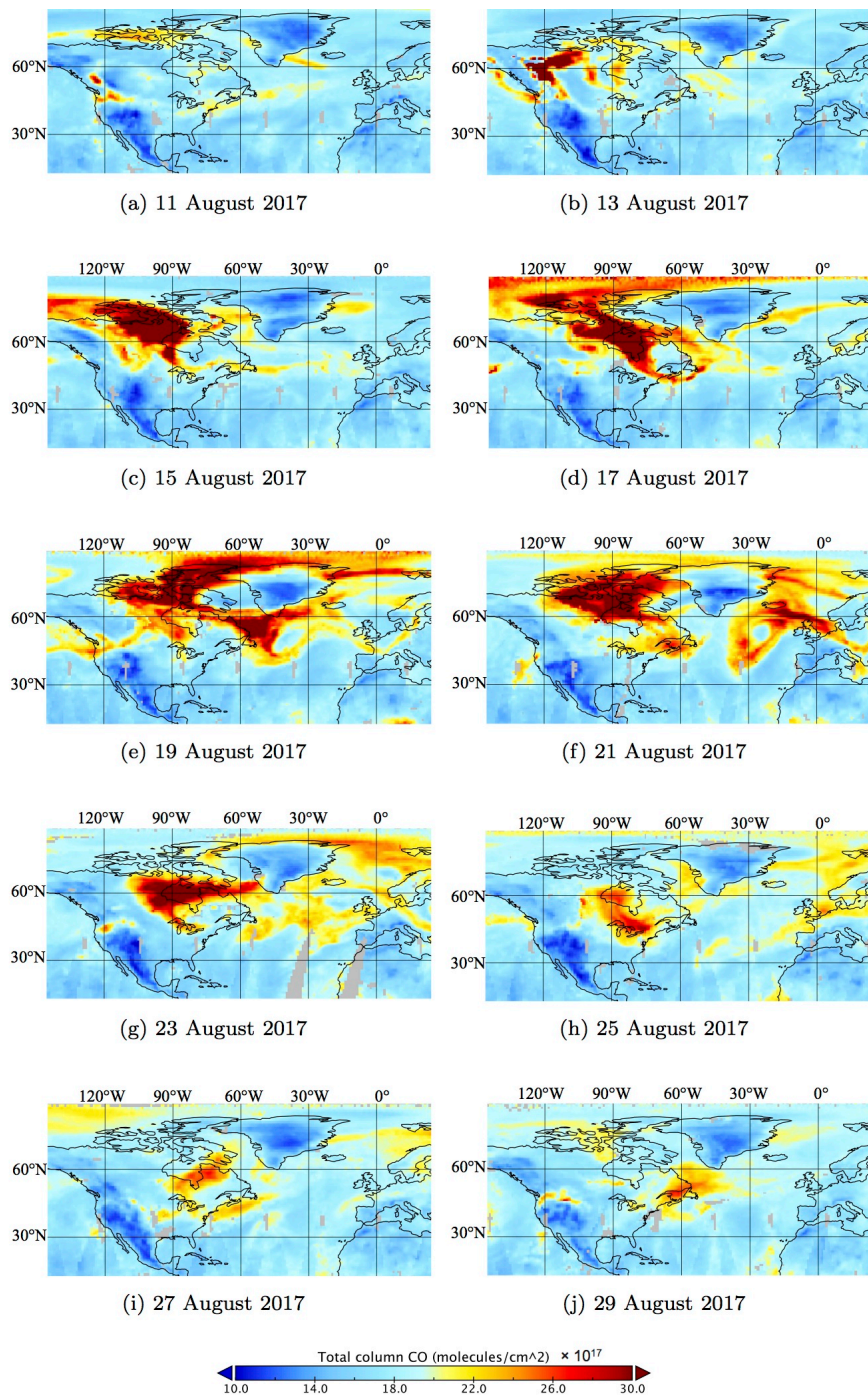

**Figure 6.** Total CO concentration (molecules/cm<sup>2</sup>) retrieved from AIRS. The maps are plotted every two days during 11 and 29 August 2017.

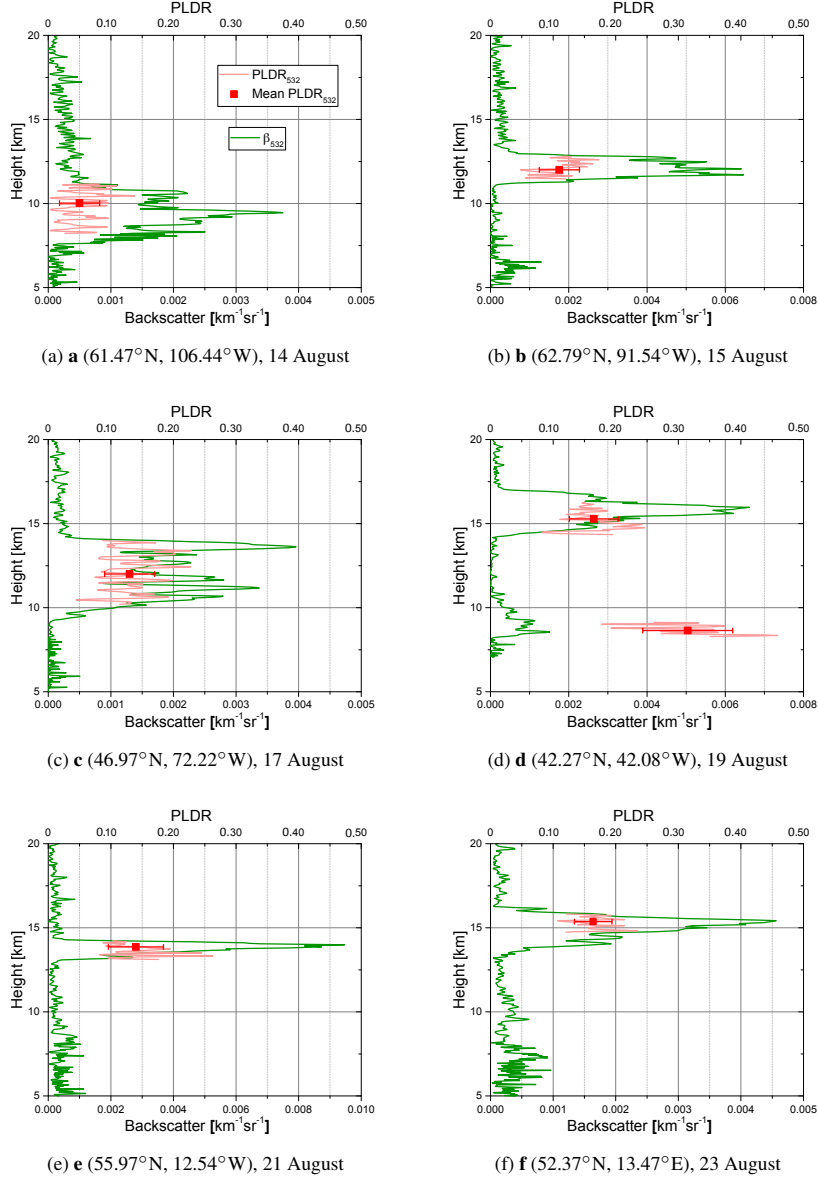

**Figure 7.** The profiles of backscatter coefficient and particle linear depolarization ratio (PLDR) at 532 nm from CALIPSO. Figure (a)-(f) correspond to the six locations **a** – **f** in Figure 4. The corresponding CALIPSO tracks are (a) 09:50:19, 14 August 2017; (b) 08:54:37, 15 August 2017; (c) 07:03:13, 17 August 2017; (d) 06:50:44, 19 August 2017; (e) 03:20:25, 21 August 2017 and (f) 01:29:01, 23 August 2017. 20 profiles are averaged over these six locations. The green and pink solid lines represent backscatter coefficient and particle linear depolarization ratio, respectively. The red squares with error bars represent the mean particle linear depolarization ratio and the standard deviation within each layer.

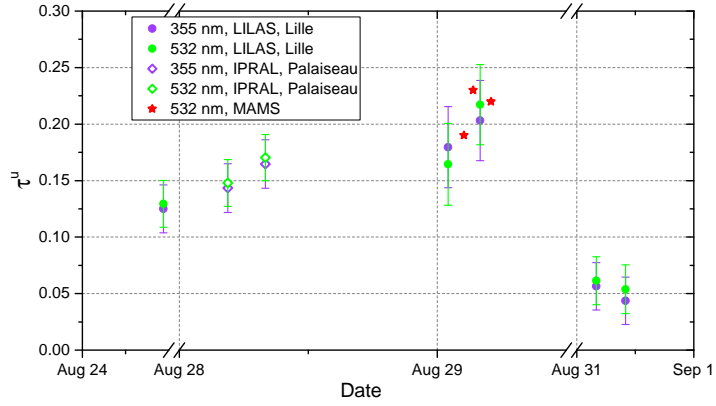

**Figure 8.** Optical depth of the stratospheric smoke layer at 355 and 532 nm estimated from Lidar signals. The optical depth estimated from LILAS (in Lille) is plotted with green (532 nm) and violet solid circles (355 nm). Optical depth calculated from IPRAL (in Palaiseau) is plotted with green (532 nm) and violet (355 nm) open diamonds. The red stars represent the optical depth calculated from the MAMS Lidar.

**Table 2.** Retrieved Lidar ratios (LR) and particle linear depolarization ratios (PLDR) from multi-wavelength Lidar systems LILAS in Lille and IPRAL in Palaiseau.  $\bar{\alpha}$  is the mean extinction coefficient in the stratospheric smoke layer.

| Lidar system           | LILAS, Lille    |                 |                 |                 |                 | IPRAL, Palaiseau |
|------------------------|-----------------|-----------------|-----------------|-----------------|-----------------|------------------|
| Date                   | 24 August       | 29 August       |                 |                 | 31 August       | 28 August        |
| Time (UTC)             | 2200 – 0030     | 1300 – 1600     | 1600 – 1800     | 2000 – 2300     | 2300 – 0200     | 1920 – 2120      |
| $\bar{\alpha}_{355}$   | $0.09 \pm 0.02$ | $0.05 \pm 0.01$ | $0.05 \pm 0.01$ | $0.04 \pm 0.01$ | $0.03 \pm 0.01$ | $0.09 \pm 0.02$  |
| $\bar{\alpha}_{532}$   | $0.10 \pm 0.02$ | $0.04 \pm 0.01$ | $0.06 \pm 0.01$ | $0.04 \pm 0.01$ | $0.03 \pm 0.01$ | $0.09 \pm 0.02$  |
| LR <sub>355</sub> (sr) | $35 \pm 6$      | $45 \pm 9$      | $41 \pm 7$      | $34 \pm 12$     | $31 \pm 15$     | $36 \pm 6$       |
| LR <sub>532</sub> (sr) | $54 \pm 9$      | $56 \pm 12$     | $54 \pm 9$      | $58 \pm 20$     | $58 \pm 23$     | $58 \pm 7$       |
| PLDR <sub>355</sub>    | $0.23 \pm 0.03$ | $0.24 \pm 0.04$ | $0.24 \pm 0.04$ | $0.28 \pm 0.08$ | $0.28 \pm 0.08$ | $0.27 \pm 0.04$  |
| PLDR <sub>532</sub>    | $0.20 \pm 0.03$ | $0.18 \pm 0.03$ | $0.19 \pm 0.03$ | $0.18 \pm 0.03$ | $0.18 \pm 0.03$ | –                |
| PLDR <sub>1064</sub>   | $0.05 \pm 0.01$ | $0.04 \pm 0.01$ | $0.05 \pm 0.01$ | $0.05 \pm 0.01$ | $0.05 \pm 0.01$ | –                |

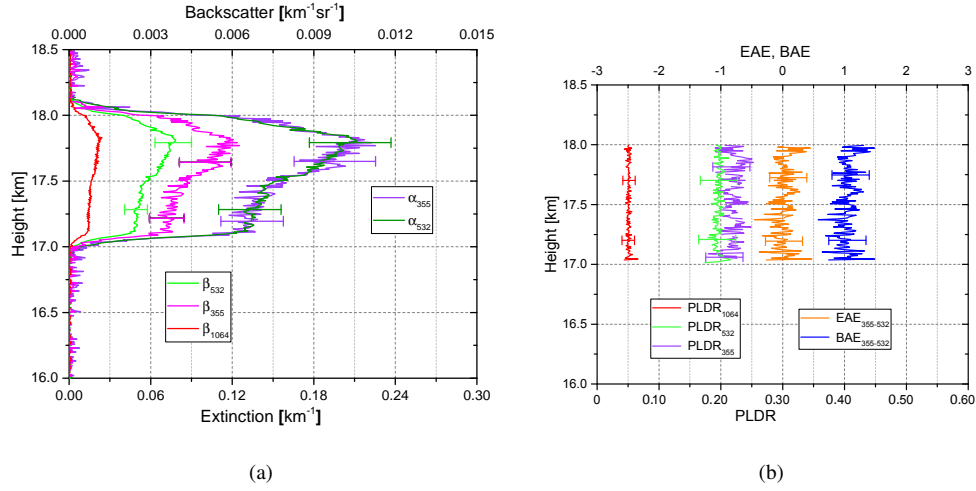

**Figure 9.** (a) Extinction and backscatter coefficient, (b) particle linear depolarization ratio (PLDR), the extinction-related Ångström exponent (EAE) and backscatter-related Ångström exponent (BAE) retrieved from LILAS observations between 2200 UTC, 24 August 2017 and 0030 UTC, 25 August 2017, Lille. The errors of extinction, backscatter coefficient and corresponding Ångström exponent at 355 and 532 nm are attributed to the error of the optical depth.

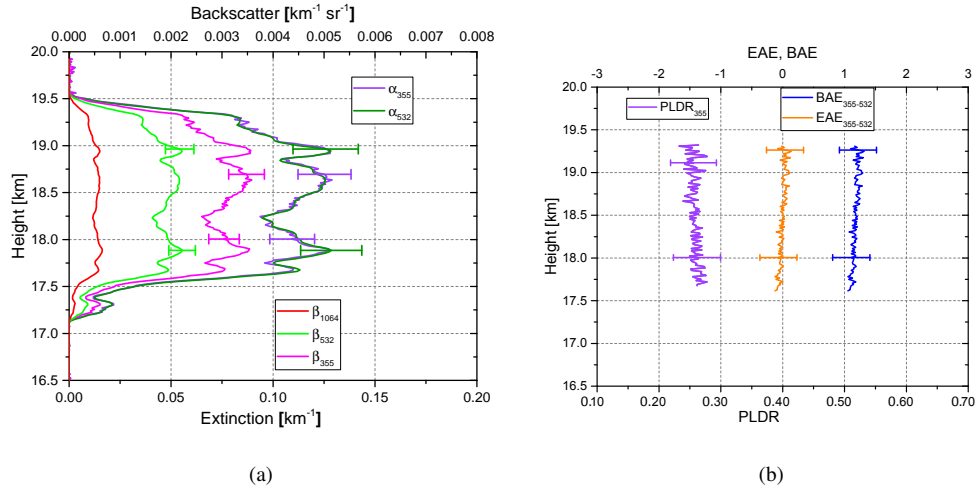

**Figure 10.** (a) Extinction and backscatter coefficient, (b) the particle linear depolarization ratio (PLDR) at 355 nm, the extinction-related Ångström exponent (EAE) and backscatter-related Ångström exponent (BAE) (between 355 nm and 532 nm) retrieved from IPRAL observations between 1920 and 2120 UTC, 28 August 2017, Palaiseau.

**Table 3.** Retrieved microphysical properties using the Lidar data in Lille and Palaiseau. Extinction and backscatter coefficients shown in Figure 9(a) and 10(a) are averaged in the range of 17–18.0 km and 17.5–19.5 km, respectively. The averaged extinction and backscatter coefficients are used as the input of regularization algorithm to retrieve particle microphysical properties.

|                      | $R_{eff}, \mu\text{m}$ | $V_c, \mu\text{m}^3\text{cm}^{-3}$ | $m_R$           | $m_I$             |
|----------------------|------------------------|------------------------------------|-----------------|-------------------|
| Lille, 24 August     | $0.33 \pm 0.10$        | $22 \pm 8$                         | $1.55 \pm 0.05$ | $0.028 \pm 0.014$ |
| Palaiseau, 28 August | $0.33 \pm 0.10$        | $15 \pm 5$                         | $1.52 \pm 0.05$ | $0.021 \pm 0.011$ |

**Table 4.** Daily averaged net DRF flux calculated by GARRLiC/GRASP. Aerosol microphysical properties in Table 3 and aerosol vertical distributions in Figure 9(a) and 10(a) are used to calculate the DRF effect at the following four vertical levels.

| $\Delta F$ (W/m <sup>2</sup> ) | TOA  | BOA   | layer top | layer base |
|--------------------------------|------|-------|-----------|------------|
| Lille, 24 August               | -1.2 | -12.3 | -2.1      | -12.0      |
| Palaiseau, 28 August           | -3.5 | -14.5 | -2.5      | -13.6      |
